# Supplementary material for: Understanding the competition between hydrodechlorination and Friedel–Crafts alkylation in PVC dechlorination with silylium ions
Source: Royal Society of Chemistry journal article supplement (doi:10.1039/d5py00242g), 2025-01-01
Supplement: d5py00242g1.pdf [file d5py00242g1.pdf]

**Electronic Supplementary Information for**  
**Understanding the Competition Between Hydrodechlorination and Friedel-Crafts Alkylation in**  
**PVC Dechlorination with Silylium Ions**

Nicholas J. Roubineau,<sup>a†</sup> Eunice C. Castro,<sup>a†</sup> Kaustubh Rane,<sup>b</sup> Zachary A. Wood,<sup>a</sup> Angelyn N. Nguyen,<sup>a</sup>  
Nancy G. Bush,<sup>a</sup> Ayon Das,<sup>a</sup> Shaama Mallikarjun Sharada,<sup>a,b\*</sup> Megan E. Fieser<sup>a,c\*</sup>

<sup>a</sup>Department of Chemistry, University of Southern California, Los Angeles, CA 90089

<sup>b</sup>Mork Family Department of Chemical Engineering and Materials Science, University of Southern  
California, Los Angeles, CA 90089

<sup>c</sup>Wrigley Institute for Environment and Sustainability, University of Southern California, Los Angeles,  
CA 90089

<sup>†</sup>N.J.R. and E.C.C. contributed equally

Email: fieser@usc.edu

|            |                                                                                                                                                                   |            |
|------------|-------------------------------------------------------------------------------------------------------------------------------------------------------------------|------------|
| <b>1.</b>  | <b>General Considerations</b>                                                                                                                                     | <b>S9</b>  |
| <b>1.1</b> | <b>Methods</b>                                                                                                                                                    | <b>S10</b> |
| <b>2.</b>  | <b>General Procedures for Hydrodechlorination and Friedel Crafts Alkylation of PVC</b>                                                                            | <b>S11</b> |
| <b>2.1</b> | <b>Optimized benchtop synthesis of Poly(ethylene-co-toluene) (Table 1, Entry 1, 4-6. Table S1)</b>                                                                | <b>S11</b> |
| <b>2.2</b> | <b>Studying the stability of [Ph<sub>3</sub>C][B(C<sub>6</sub>F<sub>5</sub>)<sub>4</sub>] (Table S2)</b>                                                          | <b>S11</b> |
| <b>2.3</b> | <b>Benchtop Synthesis of poly(ethylene-co-toluene) – Studying the effects of the slow addition of Et<sub>3</sub>SiH (Table 1, Entry 2. Table S3, Entry 5a-5b)</b> | <b>S12</b> |
| <b>2.4</b> | <b>Benchtop Synthesis of poly(ethylene-co-toluene) – Studying the effects of increasing toluene equivalents (Table 1, Entry 3. Table S3, Entry 6a-6b)</b>         | <b>S12</b> |
| <b>2.5</b> | <b>Synthesis of Poly(ethylene-co-toluene) Using TMDS (Table 2. Table S4)</b>                                                                                      | <b>S13</b> |
| <b>2.6</b> | <b>Synthesis of Poly(ethylene-co-o-xylene) (Table S5)</b>                                                                                                         | <b>S13</b> |
| <b>2.7</b> | <b>Synthesis of Poly(ethylene-co-m-xylene) (Table S6)</b>                                                                                                         | <b>S13</b> |
| <b>2.8</b> | <b>Synthesis of Poly(ethylene-co-p-xylene) (Table S7)</b>                                                                                                         | <b>S13</b> |
| <b>2.9</b> | <b>Synthesis of Poly(ethylene-co-benzene) (Table S8)</b>                                                                                                          | <b>S14</b> |

|      |                                                                                                                                                             |            |
|------|-------------------------------------------------------------------------------------------------------------------------------------------------------------|------------|
| 2.10 | Synthesis of Poly(ethylene-co-benzene) – prepared air-free with higher catalyst loading (Table S8, Entry 1a-1b)                                             | S14        |
| 2.11 | Synthesis of Poly(ethylene-co-mesitylene) (Table S9)                                                                                                        | S14        |
| 2.12 | Synthesis of Poly(ethylene-co-mesitylene) – higher catalyst loading (Table S9, Entry 3a-3b)                                                                 | S15        |
| 2.13 | Synthesis of Poly(ethylene-co-toluene) from 35 kg/mol PVC (Table S10, Entry 1a-3b)                                                                          | S15        |
| 2.14 | Synthesis of Poly(ethylene-co-toluene) from 99 kg/mol PVC (Table S10, Entry 4a-5b)                                                                          | S15        |
| 2.15 | Synthesis of Poly(ethylene-co-toluene) from 99 kg/mol PVC – higher catalyst and silane loading (Table S10, Entry 6a-6b)                                     | S15        |
| 3.   | <b>Tabulated Reaction Data</b>                                                                                                                              | <b>S16</b> |
|      | Table S1 Optimization of silylium catalyzed dechlorination of PVC on the benchtop                                                                           | S16        |
|      | Table S2 Probing the benchtop stability of the catalyst                                                                                                     | S17        |
|      | Table S3 Additional replicate runs of PVC to poly(ethylene-co-toluene)                                                                                      | S18        |
|      | Table S4 Additional replicate runs using TMDS as silane source                                                                                              | S19        |
|      | Table S5 Conversion of PVC to poly(ethylene-co-o-xylene)                                                                                                    | S20        |
|      | Table S6 Conversion of PVC to poly(ethylene-co-m-xylene)                                                                                                    | S21        |
|      | Table S7 Conversion of PVC to poly(ethylene-co-p-xylene)                                                                                                    | S22        |
|      | Table S8 Conversion of PVC to poly(ethylene-co-benzene)                                                                                                     | S23        |
|      | Table S9 Conversion of PVC to poly(ethylene-co-mesitylene)                                                                                                  | S23        |
|      | Table S10 Conversion of PVC to poly(ethylene-co-toluene) from different MW PVC substrates                                                                   | S24        |
| 4.   | <b><sup>1</sup>H NMR Data</b>                                                                                                                               | <b>S25</b> |
|      | Fig. S1 <sup>1</sup> H NMR spectrum in CDCl <sub>3</sub> of poly(vinyl chloride-co-ethylene-co-toluene) product in Table S1, Entry 1                        | S25        |
|      | Fig. S2 <sup>1</sup> H NMR spectrum in CDCl <sub>3</sub> of poly(vinyl chloride-co-ethylene-co-toluene) product in Table S1, Entry 2                        | S25        |
|      | Fig. S3 <sup>1</sup> H NMR spectrum in CDCl <sub>3</sub> of poly(vinyl chloride-co-ethylene-co-toluene) product in Table S1, Entry 3                        | S25        |
|      | Fig. S4 <sup>1</sup> H NMR spectrum in CDCl <sub>3</sub> of poly(vinyl chloride-co-ethylene-co-toluene) product in Table S1, Entry 4 and Table S3, Entry 1a | S26        |

|                                                                                                                                                                 |            |
|-----------------------------------------------------------------------------------------------------------------------------------------------------------------|------------|
| <b>Fig. S5</b> $^1\text{H}$ NMR spectrum in $\text{CDCl}_3$ of poly(vinyl chloride-co-ethylene-co-toluene) product in Table S1, Entry 5                         | <b>S26</b> |
| <b>Fig. S6</b> $^1\text{H}$ NMR spectrum in $\text{CDCl}_3$ of poly(ethylene-co-toluene) product in Table S1, Entry 6                                           | <b>S26</b> |
| <b>Fig. S7</b> $^1\text{H}$ NMR spectrum in $\text{CDCl}_3$ of poly(ethylene-co-toluene) product in Table S1, Entry 7                                           | <b>S27</b> |
| <b>Fig. S8</b> $^1\text{H}$ NMR spectrum in $\text{CDCl}_3$ of poly(ethylene-co-toluene) product in Table S2, Entry 1                                           | <b>S27</b> |
| <b>Fig. S9</b> $^1\text{H}$ NMR spectrum in $\text{CDCl}_3$ of poly(ethylene-co-toluene) product in Table S2, Entry 2                                           | <b>S27</b> |
| <b>Fig. S10</b> $^1\text{H}$ NMR spectrum in $\text{CDCl}_3$ of poly(ethylene-co-toluene) product in Table S2, Entry 3                                          | <b>S28</b> |
| <b>Fig. S11</b> $^1\text{H}$ NMR spectrum in $\text{CDCl}_3$ of poly(ethylene-co-toluene) product in Table S2, Entry 4                                          | <b>S28</b> |
| <b>Fig. S12</b> $^1\text{H}$ NMR spectrum in $\text{CDCl}_3$ of poly(ethylene-co-toluene) product in Table S2, Entry 5                                          | <b>S28</b> |
| <b>Fig. S13</b> $^1\text{H}$ NMR spectrum in $\text{CDCl}_3$ of poly(ethylene-co-toluene) product in Table S2, Entry 6                                          | <b>S29</b> |
| <b>Fig. S14</b> $^1\text{H}$ NMR spectrum in $\text{CDCl}_3$ of poly(ethylene-co-toluene) product in Table S2, Entry 7                                          | <b>S29</b> |
| <b>Fig. S15</b> $^1\text{H}$ NMR spectrum in $\text{CDCl}_3$ of poly(ethylene-co-toluene) product in Table S3, Entry 1b                                         | <b>S29</b> |
| <b>Fig. S16</b> $^1\text{H}$ NMR spectrum in $\text{CDCl}_3$ of poly(ethylene-co-toluene) product in Table S3, Entry 2a (left) and 2b (right)                   | <b>S30</b> |
| <b>Fig. S17</b> $^1\text{H}$ NMR spectrum in $\text{CDCl}_3$ of poly(ethylene-co-toluene) product in Table S3, Entry 2c                                         | <b>S30</b> |
| <b>Fig. S18</b> $^1\text{H}$ NMR spectrum in $\text{CDCl}_3$ of poly(ethylene-co-toluene) product in Table S3, Entry 3a (left) and 3b (right)                   | <b>S30</b> |
| <b>Fig. S19</b> $^1\text{H}$ NMR spectrum in $\text{CDCl}_3$ of poly(ethylene-co-toluene) product in Table S3, Entry 3c                                         | <b>S31</b> |
| <b>Fig. S20</b> $^1\text{H}$ NMR spectrum in $\text{CDCl}_3$ of poly(ethylene-co-toluene) product in Table S3, Entry 4a (left) and 4b (right)                   | <b>S31</b> |
| <b>Fig. S21</b> $^1\text{H}$ NMR spectrum in $\text{CDCl}_3$ of poly(ethylene-co-toluene) product in Table S3, Entry 4c                                         | <b>S31</b> |
| <b>Fig. S22</b> $^1\text{H}$ NMR spectrum in $\text{CDCl}_3$ of poly(vinyl chloride-co-ethylene-co-toluene) product in Table S3, Entry 5a (left) and 5b (right) | <b>S32</b> |

|                                                                                                                                                                 |            |
|-----------------------------------------------------------------------------------------------------------------------------------------------------------------|------------|
| <b>Fig. S23</b> $^1\text{H}$ NMR spectrum in $\text{CDCl}_3$ of poly(ethylene-co-toluene) product in Table S3, Entry 6a (left) and 6b (right)                   | <b>S32</b> |
| <b>Fig. S24</b> $^1\text{H}$ NMR spectrum in $\text{CDCl}_3$ of poly(vinyl chloride-co-ethylene-co-toluene) product in Table S4, Entry 1a (left) and 1b (right) | <b>S32</b> |
| <b>Fig. S25</b> $^1\text{H}$ NMR spectrum in $\text{CDCl}_3$ of poly(vinyl chloride-co-ethylene-co-toluene) product in Table S4, Entry 2a (left) and 2b (right) | <b>S33</b> |
| <b>Fig. S26</b> $^1\text{H}$ NMR spectrum in $\text{CDCl}_3$ of poly(ethylene-co-toluene) product in Table S4, Entry 3a (left) and 3b (right)                   | <b>S33</b> |
| <b>Fig. S27</b> $^1\text{H}$ NMR spectrum in $\text{CDCl}_3$ of poly(ethylene-co-toluene) product in Table S4, Entry 4a (left) and 4b (right)                   | <b>S33</b> |
| <b>Fig. S28</b> $^1\text{H}$ NMR spectrum in $\text{CDCl}_3$ of poly(ethylene-co-toluene) product in Table S4, Entry 4c                                         | <b>S34</b> |
| <b>Fig. S29</b> $^1\text{H}$ NMR spectrum in $\text{CDCl}_3$ of poly(ethylene-co-toluene) product in Table S4, Entry 5                                          | <b>S34</b> |
| <b>Fig. S30</b> $^1\text{H}$ NMR spectrum in $\text{CDCl}_3$ of poly(ethylene-co-toluene) product in Table S4, Entry 6                                          | <b>S34</b> |
| <b>Fig. S31</b> $^1\text{H}$ NMR spectrum in $\text{CDCl}_3$ of poly(vinyl chloride-co-ethylene-co-toluene) product in Table S4, Entry 7 and Table 2, Entry 1   | <b>S35</b> |
| <b>Fig. S32</b> $^1\text{H}$ NMR spectrum in $\text{CDCl}_3$ of poly(vinyl chloride-co-ethylene-co-toluene) product in Table S4, Entry 8 and Table 2, Entry 2   | <b>S35</b> |
| <b>Fig. S33</b> $^1\text{H}$ NMR spectrum in $\text{CDCl}_3$ of poly(vinyl chloride-co-ethylene-co-toluene) product in Table S4, Entry 9 and Table 2, Entry 7   | <b>S35</b> |
| <b>Fig. S34</b> $^1\text{H}$ NMR spectrum in $\text{CDCl}_3$ of poly(vinyl chloride-co-ethylene-co-toluene) product in Table S4, Entry 10 and Table 2, Entry 8  | <b>S36</b> |
| <b>Fig. S35</b> $^1\text{H}$ NMR spectrum in $\text{CDCl}_3$ of poly(vinyl chloride-co-ethylene-co-toluene) product in Table S4, Entry 11 and Table 2, Entry 9  | <b>S36</b> |
| <b>Fig. S36</b> $^1\text{H}$ NMR spectrum in $\text{CDCl}_3$ of poly(vinyl chloride-co-ethylene-co-toluene) product in Table S4, Entry 12 and Table 2, Entry 10 | <b>S36</b> |
| <b>Fig. S37</b> $^1\text{H}$ NMR spectrum in $\text{CDCl}_3$ of poly(ethylene-co-o-xylene) product in Table S5, Entry 1a (left) and 1b (right)                  | <b>S37</b> |
| <b>Fig. S38</b> $^1\text{H}$ NMR spectrum in $\text{CDCl}_3$ of poly(ethylene-co-o-xylene) product in Table S5, Entry 1c                                        | <b>S37</b> |
| <b>Fig. S39</b> $^1\text{H}$ NMR spectrum in $\text{CDCl}_3$ of poly(ethylene-co-o-xylene) product in Table S5, Entry 2a (left) and 2b (right)                  | <b>S37</b> |
| <b>Fig. S40</b> $^1\text{H}$ NMR spectrum in $\text{CDCl}_3$ of poly(ethylene-co-o-xylene) product in Table S5, Entry 2c                                        | <b>S38</b> |

|                                                                                                                                                      |            |
|------------------------------------------------------------------------------------------------------------------------------------------------------|------------|
| <b>Fig. S41</b> <sup>1</sup> H NMR spectrum in CDCl <sub>3</sub> of poly(ethylene-co-o-xylene) product in Table S5, Entry 3a (left) and 3b (right)   | <b>S38</b> |
| <b>Fig. S42</b> <sup>1</sup> H NMR spectrum in CDCl <sub>3</sub> of poly(ethylene-co-o-xylene) product in Table S5, Entry 3c                         | <b>S38</b> |
| <b>Fig. S43</b> <sup>1</sup> H NMR spectrum in CDCl <sub>3</sub> of poly(ethylene-co-m-xylene) product in Table S6, Entry 1a (left) and 1b (right)   | <b>S39</b> |
| <b>Fig. S44</b> <sup>1</sup> H NMR spectrum in CDCl <sub>3</sub> of poly(ethylene-co-m-xylene) product in Table S6, Entry 1c                         | <b>S39</b> |
| <b>Fig. S45</b> <sup>1</sup> H NMR spectrum in CDCl <sub>3</sub> of poly(ethylene-co-m-xylene) product in Table S6, Entry 2a (left) and 2b (right)   | <b>S39</b> |
| <b>Fig. S46</b> <sup>1</sup> H NMR spectrum in CDCl <sub>3</sub> of poly(ethylene-co-m-xylene) product in Table S6, Entry 2c                         | <b>S40</b> |
| <b>Fig. S47</b> <sup>1</sup> H NMR spectrum in CDCl <sub>3</sub> of poly(ethylene-co-m-xylene) product in Table S6, Entry 3a (left) and 3b (right)   | <b>S40</b> |
| <b>Fig. S48</b> <sup>1</sup> H NMR spectrum in CDCl <sub>3</sub> of poly(ethylene-co-m-xylene) product in Table S6, Entry 3c                         | <b>S40</b> |
| <b>Fig. S49</b> <sup>1</sup> H NMR spectrum in CDCl <sub>3</sub> of poly(ethylene-co-p-xylene) product in Table S7, Entry 1a (left) and 1b (right)   | <b>S41</b> |
| <b>Fig. S50</b> <sup>1</sup> H NMR spectrum in CDCl <sub>3</sub> of poly(ethylene-co-p-xylene) product in Table S7, Entry 2a (left) and 2b (right)   | <b>S41</b> |
| <b>Fig. S51</b> <sup>1</sup> H NMR spectrum in CDCl <sub>3</sub> of poly(ethylene-co-p-xylene) product in Table S7, Entry 2c                         | <b>S41</b> |
| <b>Fig. S52</b> <sup>1</sup> H NMR spectrum in CDCl <sub>3</sub> of poly(ethylene-co-p-xylene) product in Table S7, Entry 3a (left) and 3b (right)   | <b>S42</b> |
| <b>Fig. S53</b> <sup>1</sup> H NMR spectrum in CDCl <sub>3</sub> of poly(ethylene-co-benzene) product in Table S8, Entry 1a (left) and 1b (right)    | <b>S42</b> |
| <b>Fig. S54</b> <sup>1</sup> H NMR spectrum in CDCl <sub>3</sub> of poly(ethylene-co-benzene) product in Table S8, Entry 2a (left) and 2b (right)    | <b>S42</b> |
| <b>Fig. S55</b> <sup>1</sup> H NMR spectrum in CDCl <sub>3</sub> of poly(ethylene-co-benzene) product in Table S8, Entry 3a (left) and 3b (right)    | <b>S43</b> |
| <b>Fig. S56</b> <sup>1</sup> H NMR spectrum in CDCl <sub>3</sub> of poly(ethylene-co-mesitylene) product in Table S9, Entry 1a (left) and 1b (right) | <b>S43</b> |
| <b>Fig. S57</b> <sup>1</sup> H NMR spectrum in CDCl <sub>3</sub> of poly(ethylene-co-mesitylene) product in Table S9, Entry 2a (left) and 2b (right) | <b>S43</b> |
| <b>Fig. S58</b> <sup>1</sup> H NMR spectrum in CDCl <sub>3</sub> of poly(ethylene-co-mesitylene) product in Table S9, Entry 3a (left) and 3b (right) | <b>S44</b> |

|                                                                                                                                                    |            |
|----------------------------------------------------------------------------------------------------------------------------------------------------|------------|
| <b>Fig. S59</b> <sup>1</sup> H NMR spectrum in CDCl <sub>3</sub> of poly(ethylene-co-toluene) product in Table S10, Entry 1a (left) and 1b (right) | <b>S44</b> |
| <b>Fig. S60</b> <sup>1</sup> H NMR spectrum in CDCl <sub>3</sub> of poly(ethylene-co-toluene) product in Table S10, Entry 2a (left) and 2b (right) | <b>S44</b> |
| <b>Fig. S61</b> <sup>1</sup> H NMR spectrum in CDCl <sub>3</sub> of poly(ethylene-co-toluene) product in Table S10, Entry 3a (left) and 3b (right) | <b>S45</b> |
| <b>Fig. S62</b> <sup>1</sup> H NMR spectrum in CDCl <sub>3</sub> of poly(ethylene-co-toluene) product in Table S10, Entry 4a (left) and 4b (right) | <b>S45</b> |
| <b>Fig. S63</b> <sup>1</sup> H NMR spectrum in CDCl <sub>3</sub> of poly(ethylene-co-toluene) product in Table S10, Entry 5a (left) and 5b (right) | <b>S45</b> |
| <b>Fig. S64</b> <sup>1</sup> H NMR spectrum in CDCl <sub>3</sub> of poly(ethylene-co-toluene) product in Table S10, Entry 6a (left) and 6b (right) | <b>S46</b> |
| <b>5. FT-IR Spectroscopy</b>                                                                                                                       | <b>S46</b> |
| <b>Fig. S65</b> FT-IR spectrum of Table S1, Entry 1                                                                                                | <b>S46</b> |
| <b>Fig. S66</b> FT-IR spectrum of Table S1, Entry 2                                                                                                | <b>S46</b> |
| <b>Fig. S67</b> FT-IR spectrum of Table S1, Entry 3                                                                                                | <b>S47</b> |
| <b>Fig. S68</b> FT-IR spectrum of Table S1, Entry 4                                                                                                | <b>S47</b> |
| <b>Fig. S69</b> FT-IR spectrum of Table S1, Entry 7                                                                                                | <b>S47</b> |
| <b>Fig. S70</b> FT-IR spectrum of Table S2, Entry 1                                                                                                | <b>S47</b> |
| <b>Fig. S71</b> FT-IR spectrum of Table S2, Entry 2                                                                                                | <b>S48</b> |
| <b>Fig. S72</b> FT-IR spectrum of Table S2, Entry 3                                                                                                | <b>S48</b> |
| <b>Fig. S73</b> FT-IR spectrum of Table S2, Entry 4                                                                                                | <b>S48</b> |
| <b>Fig. S74</b> FT-IR spectrum of Table S2, Entry 5                                                                                                | <b>S48</b> |
| <b>Fig. S75</b> FT-IR spectrum of Table S2, Entry 6                                                                                                | <b>S49</b> |
| <b>Fig. S76</b> FT-IR spectrum of Table S3, Entry 1b                                                                                               | <b>S49</b> |
| <b>Fig. S77</b> FT-IR spectrum of Table S3, Entry 2a (left) and 2c (right)                                                                         | <b>S49</b> |
| <b>Fig. S78</b> FT-IR spectrum of Table S3, Entry 3a (left) and 3c (right)                                                                         | <b>S49</b> |
| <b>Fig. S79</b> FT-IR spectrum of Table S3, Entry 4a (left) and 4c (right)                                                                         | <b>S50</b> |
| <b>Fig. S80</b> FT-IR spectrum of Table 2, Entry 9                                                                                                 | <b>S50</b> |
| <b>Fig. S81</b> FT-IR spectrum of Table S5, Entry 1b (left) and 1c (right)                                                                         | <b>S50</b> |
| <b>Fig. S82</b> FT-IR spectrum of Table S5, Entry 2b (left) and 2c (right)                                                                         | <b>S50</b> |
| <b>Fig. S83</b> FT-IR spectrum of Table S5, Entry 3b (left) and 3c (right)                                                                         | <b>S51</b> |

|                                                                                                  |            |
|--------------------------------------------------------------------------------------------------|------------|
| <b>Fig. S84</b> FT-IR spectrum of Table S6, Entry 1b (left) and 1c (right)                       | <b>S51</b> |
| <b>Fig. S85</b> FT-IR spectrum of Table S6, Entry 2b (left) and 2c (right)                       | <b>S51</b> |
| <b>Fig. S86</b> FT-IR spectrum of Table S7, Entry 1b                                             | <b>S51</b> |
| <b>Fig. S87</b> FT-IR spectrum of Table S7, Entry 2b                                             | <b>S52</b> |
| <b>Fig. S88</b> FT-IR spectrum of Table S8, Entry 1b                                             | <b>S52</b> |
| <b>Fig. S89</b> FT-IR spectrum of Table S8, Entry 2a                                             | <b>S52</b> |
| <b>Fig. S90</b> FT-IR spectrum of Table S9, Entry 1a                                             | <b>S52</b> |
| <b>Fig. S91</b> FT-IR spectrum of Table S10, Entry 2b                                            | <b>S53</b> |
| <b>Fig. S92</b> FT-IR spectrum of Table S10, Entry 5a                                            | <b>S53</b> |
| <b>6. Differential Scanning Calorimetry (DSC)</b>                                                | <b>S53</b> |
| <b>Fig. S93</b> DSC (2 <sup>nd</sup> heating curve) of Table S3, Entry 1a (left) and 1b (right)  | <b>S53</b> |
| <b>Fig. S94</b> DSC (2 <sup>nd</sup> heating curve) of Table S3, Entry 2a (left) and 2c (right)  | <b>S54</b> |
| <b>Fig. S95</b> DSC (2 <sup>nd</sup> heating curve) of Table S3, Entry 3a (left) and 3c (right)  | <b>S54</b> |
| <b>Fig. S96</b> DSC (2 <sup>nd</sup> heating curve) of Table S3, Entry 4a (left) and 4c (right)  | <b>S54</b> |
| <b>Fig. S97</b> DSC (2 <sup>nd</sup> heating curve) of Table S3, Entry 6a                        | <b>S54</b> |
| <b>Fig. S98</b> DSC (2 <sup>nd</sup> heating curve) of Table S4, Entry 2b                        | <b>S55</b> |
| <b>Fig. S99</b> DSC (2 <sup>nd</sup> heating curve) of Table S4, Entry 4a                        | <b>S55</b> |
| <b>Fig. S100</b> DSC (2 <sup>nd</sup> heating curve) of Table S4, Entry 5                        | <b>S55</b> |
| <b>Fig. S101</b> DSC (2 <sup>nd</sup> heating curve) of Table S4, Entry 6                        | <b>S55</b> |
| <b>Fig. S102</b> DSC (2 <sup>nd</sup> heating curve) of Table S5, Entry 1a (left) and 1c (right) | <b>S56</b> |
| <b>Fig. S103</b> DSC (2 <sup>nd</sup> heating curve) of Table S5, Entry 2a (left) and 2b (right) | <b>S56</b> |
| <b>Fig. S104</b> DSC (2 <sup>nd</sup> heating curve) of Table S5, Entry 3a (left) and 3c (right) | <b>S56</b> |
| <b>Fig. S105</b> DSC (2 <sup>nd</sup> heating curve) of Table S6, Entry 1a (left) and 1c (right) | <b>S56</b> |
| <b>Fig. S106</b> DSC (2 <sup>nd</sup> heating curve) of Table S6, Entry 2a (left) and 2c (right) | <b>S57</b> |
| <b>Fig. S107</b> DSC (2 <sup>nd</sup> heating curve) of Table S6, Entry 3a (left) and 3c (right) | <b>S57</b> |
| <b>Fig. S108</b> DSC (2 <sup>nd</sup> heating curve) of Table S7, Entry 1a (left) and 1b (right) | <b>S57</b> |
| <b>Fig. S109</b> DSC (2 <sup>nd</sup> heating curve) of Table S7, Entry 2a (left) and 2b (right) | <b>S57</b> |
| <b>Fig. S110</b> DSC (2 <sup>nd</sup> heating curve) of Table S7, Entry 3a (left) and 3b (right) | <b>S58</b> |
| <b>Fig. S111</b> DSC (2 <sup>nd</sup> heating curve) of Table S8, Entry 1a (left) and 1b (right) | <b>S58</b> |

|                  |                                                                                                                                                                                                                                                                                                   |            |
|------------------|---------------------------------------------------------------------------------------------------------------------------------------------------------------------------------------------------------------------------------------------------------------------------------------------------|------------|
| <b>Fig. S112</b> | DSC (2 <sup>nd</sup> heating curve) of Table S8, Entry 2a (left) and 2b (right)                                                                                                                                                                                                                   | <b>S58</b> |
| <b>Fig. S113</b> | DSC (2 <sup>nd</sup> heating curve) of Table S8, Entry 3a (left) and 3b (right)                                                                                                                                                                                                                   | <b>S58</b> |
| <b>Fig. S114</b> | DSC (2 <sup>nd</sup> heating curve) of Table S9, Entry 1a (left) and 1b (right)                                                                                                                                                                                                                   | <b>S59</b> |
| <b>Fig. S115</b> | DSC (2 <sup>nd</sup> heating curve) of Table S9, Entry 2a (left) and 2b (right)                                                                                                                                                                                                                   | <b>S59</b> |
| <b>Fig. S116</b> | DSC (2 <sup>nd</sup> heating curve) of Table S9, Entry 3a (left) and 3b (right)                                                                                                                                                                                                                   | <b>S59</b> |
| <b>Fig. S117</b> | DSC (2 <sup>nd</sup> heating curve) of Table S10, Entry 1a (left) and 1b (right)                                                                                                                                                                                                                  | <b>S59</b> |
| <b>Fig. S118</b> | DSC (2 <sup>nd</sup> heating curve) of Table S10, Entry 2a (left) and 2b (right)                                                                                                                                                                                                                  | <b>S60</b> |
| <b>Fig. S119</b> | DSC (2 <sup>nd</sup> heating curve) of Table S10, Entry 3a (left) and 3b (right)                                                                                                                                                                                                                  | <b>S60</b> |
| <b>Fig. S120</b> | DSC (2 <sup>nd</sup> heating curve) of Table S10, Entry 4a (left) and 4b (right)                                                                                                                                                                                                                  | <b>S60</b> |
| <b>Fig. S121</b> | DSC (2 <sup>nd</sup> heating curve) of Table S10, Entry 5a (left) and 5b (right)                                                                                                                                                                                                                  | <b>S60</b> |
| <b>Fig. S122</b> | DSC (2 <sup>nd</sup> heating curve) of Table S10, Entry 6a (left) and 6b (right)                                                                                                                                                                                                                  | <b>S61</b> |
| <b>7.</b>        | <b>Thermogravimetric Analysis (TGA)</b>                                                                                                                                                                                                                                                           | <b>S61</b> |
| <b>Fig. S123</b> | TGA heating curve of Table S3, Entry 1b (left) and 2c (right)                                                                                                                                                                                                                                     | <b>S61</b> |
| <b>Fig. S124</b> | TGA heating curve of Table S5, Entry 1b (left) and 2b (right)                                                                                                                                                                                                                                     | <b>S61</b> |
| <b>Fig. S125</b> | TGA heating curve of Table S6, Entry 1b (left) and 2c (right)                                                                                                                                                                                                                                     | <b>S62</b> |
| <b>Fig. S126</b> | TGA heating curve of Table S8, Entry 3a                                                                                                                                                                                                                                                           | <b>S62</b> |
| <b>8.</b>        | <b>Computational Details</b>                                                                                                                                                                                                                                                                      | <b>S63</b> |
| <b>Table S11</b> | Relative free energies of states representing hydride transfer from TMDS to the model propyl cation/2-chloropropane (2CP) and their diagrammatic representations. TMDS_x_x is TMDS where x represents the bond to Si either H or Cl, TMDS_cation represents a Si <sup>+</sup> formed in the TMDS. | <b>S64</b> |
| <b>Table S12</b> | Free energy changes associated with hydride addition, FC alkylation, and polyindene formation upon dechlorination of model PVC compounds.                                                                                                                                                         | <b>S64</b> |
| <b>Fig. S127</b> | Structures constituting states described on Fig. 4 of the paper and Table S12 of the SI.                                                                                                                                                                                                          | <b>S65</b> |
| <b>9.</b>        | <b>References</b>                                                                                                                                                                                                                                                                                 | <b>S65</b> |

## 1. General Considerations

Most polymerization reactions were performed on the benchtop once conditions were optimized, unless noted otherwise. Any air-free polymerization reaction was set up in a nitrogen-containing glovebox before the reaction vessel is closed and the polymerization reaction is brought out of the glovebox and conducted closed in a fume hood.  $[\text{Ph}_3\text{C}][\text{B}(\text{C}_6\text{F}_5)_4]$  was purchased from Fisher Chemical (Fisher, Product #: T28635G), anhydrous grade triethylsilane ( $\text{Et}_3\text{SiH}$ ) (Aldrich, Product #: 230197) was purchased from Aldrich, and 1,1,3,3-tetramethyldisiloxane (TMDS) was purchased from Fischer Chemical and used as received.  $[\text{Ph}_3\text{C}][\text{B}(\text{C}_6\text{F}_5)_4]$ , anhydrous grade triethyl silane, benzene, toluene, ortho-, meta- and para-xylene were all stored and transferred out of the glovebox in a 20 mL scintillation vial to be properly used under benchtop conditions. All reagents were used within the same week of being brought out of the glovebox with the exception of the trityl borate lifetime studies in which the dried toluene, dried poly(vinyl chloride) (PVC), and  $\text{Et}_3\text{SiH}$  were all brought out on the same day of the reaction. “Low  $M_n$ ” PVC ( $M_n = 43 \text{ kg/mol}$ ),  $M_n = 35 \text{ kg/mol}$  PVC, and  $M_n = 99 \text{ kg/mol}$  PVC purchased from Aldrich were readily available on benchtop and used as received. Mesitylene and TMDS were readily available on benchtop and used as received. NMR solvent  $\text{CDCl}_3$  was purchased from Cambridge Isotope Laboratories and used as received. Product yields for the synthesized vinyl aromatic copolymers were estimated using the following theoretical yield formula:  $\text{mmolPVC} \times \{(\text{mol}\%_{\text{PVC}} \times \text{MW}_{\text{PVC}}) + (\text{mol}\%_{\text{PE}} \times \text{MW}_{\text{PE}}) + \text{mol}\%_{\text{P}'\text{A}''} \times \text{MW}_{\text{P}'\text{A}''}\}$ .

To calculate:

$\text{mol}\%_{\text{P}'\text{A}''}$  -

$$\text{PE}_{\text{relative amount}} = \frac{(\text{PE}_{\text{int}} - (\text{PVC}_{\text{int}} \times 2)) - (\# \text{ of H unaccounted for in PA unit})}{4}$$

$$\text{mol \% P'A'} = \frac{1}{1 + \text{PVC}_{\text{int}} + \text{PE}_{\text{relative amount}}} \times 100$$

$\text{mol}\%_{\text{PE}}$  -

$$\text{PE}_{\text{relative amount}} = \frac{(\text{PE}_{\text{int}} - (\text{PVC}_{\text{int}} \times 2)) - (\# \text{ of H unaccounted for in PA unit})}{4}$$

$$\text{mol \% PE} = \frac{\text{PE}_{\text{relative amount}}}{1 + \text{PVC}_{\text{int}} + \text{PE}_{\text{relative amount}}} \times 100$$

$$\text{mol \% P''VC} = 100 - (\text{mol\% PE} + \text{mol\% P'A'})$$

Where “A” is the aromatic solvent being used.

## 1.1. Methods

<sup>1</sup>H nuclear magnetic resonance (NMR) spectra were recorded on a Varian Mercury 400 Magnetic Resonance Spectrometer and referenced to residual solvent resonances. Thermogravimetric analysis (TGA) data were collected using a Mettler-Toledo STARE System TGA/DSC3+ with a heating rate of 10 °C/min. Fourier Transform Infrared Spectroscopy (FT-IR) data was collected using an Agilent Cary 630 FTIR spectrometer equipped with a single reflection diamond (Di) attenuated total reflectance (ATR) module. DSC traces were recorded using a TA Instruments Discovery DSC 250 Auto, equipped with a Discovery LN<sub>2</sub> Pump, and processed with TRIOS software. The DSC measurements were made at a heating rate of 10 °C/min and N<sub>2</sub> flow rate of 20 ml/min, and *T<sub>g</sub>* values were obtained from the peak of the glass transition in the second heating curve. No *T<sub>m</sub>* values were observed.

DFT calculations are performed using the quantum chemistry software Q-Chem<sup>1</sup> at ωB97X-D/def2-SVP<sup>2,3</sup> level of theory. These calculations employ the conductor-like polarizable continuum model (C-PCM) for implicit solvation to capture the effect of the solvent THF (dielectric constant = 7.58).<sup>4-6</sup> The minima are verified using the vibrational analysis and the free energies computed using the rigid rotor harmonic oscillator approximation at 298K.<sup>7</sup> 1,3,5,7-tetrachloroheptane is chosen as the model PVC system which is dechlorinated by triethylsilane (TES). This computational study investigates the relative thermodynamic feasibilities of competing hydrodechlorination, Friedel-Crafts (FC) alkylation, and polyindene formation reactions.

## 2. General Procedures for Hydrodechlorination and Friedel Crafts Alkylation of PVC

### 2.1. Optimized benchtop synthesis of Poly(ethylene-co-toluene) (Table 1, Entry 1, 4-6. Table S1)

[Ph<sub>3</sub>C][B(C<sub>6</sub>F<sub>5</sub>)<sub>4</sub>] (5.0 mg, 0.005 mmol, 0.25 mol%), Et<sub>3</sub>SiH (0.52 mL, 3.26 mmol, 1.5 equiv), dry toluene (2.53 mL, 23.9 mmol, 11 equiv) (all previously stored under N<sub>2</sub> atmosphere in a glovebox) and a stir bar were transferred into a 2 dram vial equipped with an aluminum lined cap. The mixture was allowed to stir for 5 minutes at room temperature before being pipetted into another 2-dram vial, equipped with a Teflon coated cap, that contained pre-weighed low molecular weight PVC (136.0 mg, 2.18 mmol, 1 equiv). The vial was then sealed with electrical tape and, immediately after, placed inside a Chemglass high-throughput tray that was preheated at 110 °C. After stirring at 600 rpm for 30 minutes, the reaction mixture was transferred into a 20 mL scintillation vial and then quenched with isopropanol (~15 mL), which resulted in the precipitation of white solids. The solids were left to settle overnight before decanting the supernatant and drying under vacuum at 80 °C overnight.

### 2.2. Studying the stability of [Ph<sub>3</sub>C][B(C<sub>6</sub>F<sub>5</sub>)<sub>4</sub>] (Table S2)

[Ph<sub>3</sub>C][B(C<sub>6</sub>F<sub>5</sub>)<sub>4</sub>] was first stored outside the desiccator for up to 71 days. On each dedicated day of the reaction, Et<sub>3</sub>SiH, dried toluene, and dried low molecular weight PVC were all transferred outside of the glovebox before being weighed and prepared on the benchtop. [Ph<sub>3</sub>C][B(C<sub>6</sub>F<sub>5</sub>)<sub>4</sub>] (5.0 mg, 0.005 mmol, 0.25 mol%), Et<sub>3</sub>SiH (0.52 mL, 3.26 mmol 1.5 equiv), toluene (2.53 mL, 23.9 mmol 11 equiv), and a stir bar were first transferred into a 2-dram vial equipped with an aluminum lined cap. The mixture was then allowed to stir for approximately 5 minutes before being pipetted into another 2-dram vial with a Teflon-coated cap that contained the dried low molecular weight PVC (136.0 mg, 2.18 mmol, 1 equiv). Note that the dried PVC was also weighed on the benchtop. The vial was then sealed with electrical tape and, immediately after, placed on a Chemglass high-throughput tray preheated at 110°C. After stirring at 600 rpm for 30 minutes, the reaction mixture was transferred into a 20 mL scintillation vial and quenched with isopropanol (15 mL), which resulted in the precipitation of white solids. The solids were left to settle overnight before the supernatant was decanted. An alternative and quicker process is to centrifuge the solution before decanting

the supernatant. Prior to characterization, the polymer was also dried at approximately 80 °C over 14 hours under dynamic vacuum.

### **2.3 Benchtop Synthesis of poly(ethylene-co-toluene) – Studying the effects of the slow addition of Et<sub>3</sub>SiH (Table 1, Entry 2. Table S3, Entry 5a-5b)**

An addition funnel was first prepared with a mixture of Et<sub>3</sub>SiH (0.42 mL, 2.63 mmol, 1.2 equiv) and toluene (2.00 mL, 18.9 mmol, 8.7 equiv). [Ph<sub>3</sub>C][B(C<sub>6</sub>F<sub>5</sub>)<sub>4</sub>] (5.0 mg, 0.005 mmol, 0.25 mol%), toluene (2.53 mL, 23.9 mmol, 11 equiv), Et<sub>3</sub>SiH (0.05 mL, 0.313 mmol, 0.15 equiv), and a stir bar were first transferred into a 2 dram vial equipped with an aluminum lined cap. The mixture was then allowed to stir for 5 minutes before pipetted into a 50 mL round bottom flask containing pre-weighed low molecular weight PVC (136.0 mg, 2.18 mmol, 1 equiv). The round bottom flask was then secured onto the addition funnel and, immediately after, lowered into an oil bath that was preheated at 60 °C. The Et<sub>3</sub>SiH in the separatory funnel was then added in a slow and constant stream over 10 minutes. After adding all of the Et<sub>3</sub>SiH, the reaction mixture was left to stir for 2 hours before being quenched with isopropanol (15 mL). This resulted in the precipitation of white solids. The solids were left to settle for several hours before decanting the supernatant. Prior to characterization, the polymer was also dried at approximately 80 °C over 14 hours under dynamic vacuum.

### **2.4 Benchtop Synthesis of poly(ethylene-co-toluene) – Studying the effects of increasing toluene equivalents (Table 1, Entry 3. Table S3, Entry 6a-6b)**

[Ph<sub>3</sub>C][B(C<sub>6</sub>F<sub>5</sub>)<sub>4</sub>] (5.0 mg, 0.005 mmol, 0.25 mol%), Et<sub>3</sub>SiH (0.52 mL, 3.26 mmol, 1.5 equiv), toluene (5.06 mL, 47.9 mmol, 22 equiv), and a stir bar were transferred into a 2 dram vial equipped with an aluminum lined cap. The mixture was then allowed to stir for approximately 5 minutes before being pipetted into another 2-dram vial, equipped with a Teflon-coated cap, that contained low molecular weight PVC (136.0 mg, 2.18 mmol, 1 equiv). The vial was then sealed with electrical tape and, immediately after, placed on a Chemglass high-throughput tray preheated at 110°C. After stirring at 600 rpm for 18 hours, the reaction mixture was transferred into a 20 mL scintillation vial and then quenched with isopropanol (15 mL), which resulted in the precipitation of white solids. The solids were left to settle overnight before decanting the

supernatant. An alternative and quicker process is to centrifuge the solution before decanting the supernatant. Prior to characterization, the polymer was also dried at approximately 80 °C over 14 hours under dynamic vacuum.

### **2.5. Synthesis of Poly(ethylene-co-toluene) Using TMDS (Table 2. Table S4)**

[Ph<sub>3</sub>C][B(C<sub>6</sub>F<sub>5</sub>)<sub>4</sub>] (5.0 mg, 0.005 mmol, 0.25 mol%), TMDS (0.21-0.58 mL, 1.20-3.26 mmol, 0.55-1.5 equiv), toluene stored on the benchtop (2.53 mL, 23.9 mmol, 11 equiv) and a stir bar were transferred into a 2 dram vial equipped with an aluminum lined cap. The mixture was allowed to stir for 5 minutes at room temperature before being pipetted into another 2-dram vial, equipped with a Teflon coated cap, that contained pre-weighed low molecular weight PVC (136.0 mg, 2.18 mmol, 1 equiv). The vial was then sealed with electrical tape and, immediately after, placed inside a Chemglass high-throughput tray that was preheated at 110 °C. After stirring at 600 rpm for 30 minutes, the reaction mixture was transferred into a 20 mL scintillation vial and then quenched with isopropanol (~15 mL), which resulted in the precipitation of white solids. The solids were left to settle overnight before decanting the supernatant and drying under vacuum at 80 °C overnight.

### **2.6 Synthesis of Poly(ethylene-co-o-xylene) (Table S5)**

Reaction was performed following similar procedure as that for poly(ethylene-co-toluene), in which the volume of ortho-xylene was kept constant, thus the equivalents were lower (2.53 mL, 20.9 mmol, 9.6 equiv).

### **2.7 Synthesis of Poly(ethylene-co-m-xylene) (Table S6)**

Reaction was performed following similar procedure as that for poly(ethylene-co-toluene), in which the volume of meta-xylene was kept constant, thus the equivalents were lower (2.53 mL, 20.7 mmol, 9.5 equiv).

### **2.8 Synthesis of Poly(ethylene-co-p-xylene) (Table S7)**

Reaction was performed following similar procedure as that for poly(ethylene-co-toluene), in which the volume of para-xylene was kept constant, thus the equivalents were lower (2.53 mL, 20.5 mmol, 9.4 equiv).

## 2.9 Synthesis of Poly(ethylene-co-benzene) (Table S8)

Reaction was performed following similar procedure as that for poly(ethylene-co-toluene), in which the volume of benzene was kept constant, thus the equivalents were higher (2.53 mL, 28.3 mmol, 13 equiv).

## 2.10 Synthesis of Poly(ethylene-co-benzene) – prepared airfree with higher catalyst loading (Table S8, Entry 1a-1b)

[Ph<sub>3</sub>C][B(C<sub>6</sub>F<sub>5</sub>)<sub>4</sub>] (10.0 mg, 0.011 mmol, 0.5 mol%), Et<sub>3</sub>SiH (0.52 mL, 3.26 mmol, 1.5 equiv), dry benzene (2.53 mL, 28.3 mmol, 13 equiv) and a stir bar were transferred into a 2 dram vial equipped with an aluminum lined cap. The mixture was allowed to stir for 5 minutes at room temperature before being pipetted into another 2-dram vial, equipped with a Teflon coated cap, that contained pre-weighed low molecular weight PVC (136.0 mg, 2.18 mmol, 1 equiv). Previous steps performed under N<sub>2</sub> atmosphere in a glovebox. The vial was then sealed with electrical tape and, immediately after, placed inside a Chemglass high-throughput tray that was preheated at 110 °C. After stirring at 600 rpm for 30 minutes, the reaction mixture was transferred into a 20 mL scintillation vial and then quenched with isopropanol (~15 mL), which resulted in the precipitation of white solids. The solids were left to settle overnight before decanting the supernatant and drying under vacuum at 80 °C overnight.

## 2.11 Synthesis of Poly(ethylene-co-mesitylene) (Table S9)

[Ph<sub>3</sub>C][B(C<sub>6</sub>F<sub>5</sub>)<sub>4</sub>] (5.0 mg, 0.005 mmol, 0.25 mol%) (previously stored under N<sub>2</sub> atmosphere in a glovebox), Et<sub>3</sub>SiH (0.52 mL, 3.26 mmol, 1.5 equiv) and mesitylene (2.53 mL, 18.2 mmol, 8.4 equiv) (both from the benchtop) and a stir bar were transferred into a 2 dram vial equipped with an aluminum lined cap. The mixture was allowed to stir for 5 minutes at room temperature before being pipetted into another 2-dram vial, equipped with a Teflon coated cap, that contained pre-weighed low molecular weight PVC (136.0 mg, 2.18 mmol, 1 equiv). The vial was then sealed with electrical tape and, immediately after, placed inside a Chemglass high-throughput tray that was preheated at 110 °C. After stirring at 600 rpm for 30 minutes, the reaction mixture was transferred into a 20 mL scintillation vial and then quenched with isopropanol (~15

mL), which resulted in the precipitation of white solids. The reaction mixture was then cooled to 0°C, centrifuged, and the supernatant was decanted. The were dried under vacuum at 80 °C overnight.

### **2.12 Synthesis of Poly(ethylene-co-mesitylene) – higher catalyst loading (Table S9, Entry 3a-3b)**

[Ph<sub>3</sub>C][B(C<sub>6</sub>F<sub>5</sub>)<sub>4</sub>] (10.0 mg, 0.011 mmol, 0.5 mol%) (previously stored under N<sub>2</sub> atmosphere in a glovebox), Et<sub>3</sub>SiH (0.52 mL, 3.26 mmol, 1.5 equiv) and mesitylene (2.53 mL, 18.2 mmol, 8.4 equiv) (both from the benchtop) and a stir bar were transferred into a 2 dram vial equipped with an aluminum lined cap. The mixture was allowed to stir for 5 minutes at room temperature before being pipetted into another 2-dram vial, equipped with a Teflon coated cap, that contained pre-weighed low molecular weight PVC (136.0 mg, 2.18 mmol, 1 equiv). The vial was then sealed with electrical tape and, immediately after, placed inside a Chemglass high-throughput tray that was preheated at 110 °C. After stirring at 600 rpm for 30 minutes, the reaction mixture was transferred into a 20 mL scintillation vial and then quenched with isopropanol (~15 mL), which resulted in the precipitation of white solids. The reaction mixture was then cooled to 0°C, centrifuged, and the supernatant was decanted. The were dried under vacuum at 80 °C overnight.

### **2.13 Synthesis of Poly(ethylene-co-toluene) from 35 kg/mol PVC (Table S10, Entry 1a-3b)**

Reaction was performed following similar procedure as that for poly(ethylene-co-toluene) using 43 kg/mol PVC.

### **2.14 Synthesis of Poly(ethylene-co-toluene) from 99 kg/mol PVC (Table S10, Entry 4a-5b)**

Reaction was performed following similar procedure as that for poly(ethylene-co-toluene) using 99 kg/mol PVC.

### **2.15 Synthesis of Poly(ethylene-co-toluene) from 99 kg/mol PVC – higher catalyst and silane loading (Table S10, Entry 6a-6b)**

[Ph<sub>3</sub>C][B(C<sub>6</sub>F<sub>5</sub>)<sub>4</sub>] (10.0 mg, 0.011 mmol, 0.5 mol%), Et<sub>3</sub>SiH (0.69 mL, 4.4 mmol, 2.0 equiv), dry toluene (2.53 mL, 23.9 mmol, 11 equiv) (all previously stored under N<sub>2</sub> atmosphere in a glovebox) and a stir bar were transferred into a 2 dram vial equipped with an aluminum lined cap. The mixture was allowed to stir for 5 minutes at room temperature before being pipetted into another 2-dram vial, equipped with a Teflon coated cap, that contained pre-weighed 99 kg/mol PVC (136.0 mg, 2.18 mmol, 1 equiv). The vial was then

sealed with electrical tape and, immediately after, placed inside a Chemglass high-throughput tray that was preheated at 110 °C. After stirring at 600 rpm for 30 minutes, the reaction mixture was transferred into a 20 mL scintillation vial and then quenched with isopropanol (~15 mL), which resulted in the precipitation of white solids. The solids were left to settle overnight before decanting the supernatant and drying under vacuum at 80 °C overnight.

### 3. Tabulated Reaction Data

**Table S1** Optimization of silylium catalyzed dechlorination of PVC on the benchtop

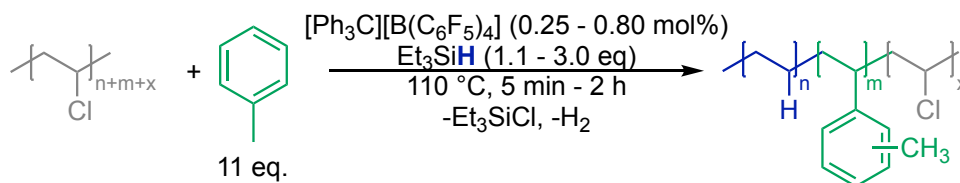

| Entry | $[\text{Ph}_3\text{C}][\text{B}(\text{C}_6\text{F}_5)_4]$ loading (mol %) <sup>a</sup> | $\text{Et}_3\text{SiH}$ (eq) <sup>b</sup> | Time (min) | PE mol% <sup>c</sup> | Aryl mol% <sup>c</sup> | PVC mol% <sup>c</sup> | Variation from Standard                                                          |
|-------|----------------------------------------------------------------------------------------|-------------------------------------------|------------|----------------------|------------------------|-----------------------|----------------------------------------------------------------------------------|
| 1     | 0.25                                                                                   | 1.1                                       | 5          | 70                   | 18                     | 12                    | None                                                                             |
| 2     | 0.25                                                                                   | 1.1                                       | 5          | 58                   | 17                     | 25                    | Air-exposed                                                                      |
| 3     | 0.25                                                                                   | 1.1                                       | 120        | 75                   | 19                     | 6                     | Air-exposed, longer time (2 h)                                                   |
| 4     | 0.80                                                                                   | 1.1                                       | 120        | 76                   | 14                     | 10                    | Air-exposed, higher initiator loading (0.8 mol%), longer time (2 h)              |
| 5     | 0.25                                                                                   | 1.1                                       | 5          | 77                   | 22                     | 1                     | Air-exposed, dried toluene                                                       |
| 6     | 0.25                                                                                   | 3.0                                       | 120        | 82                   | 18                     | 0                     | Air-exposed, higher silane amount (3 eq.), longer time (2 h)                     |
| 7     | 0.25                                                                                   | 1.5                                       | 30         | 79                   | 21                     | 0                     | Air-exposed, dried toluene, longer time (30 min), higher silane amount (1.5 eq.) |

<sup>a</sup>Initiator mol% relative to moles of PVC. <sup>b</sup> $\text{Et}_3\text{SiH}$  equivalence relative to PVC. <sup>c</sup>Calculated from  $^1\text{H}$  NMR spectra taken in  $\text{CDCl}_3$ .

**Table S2** Probing the benchtop stability of the catalyst

| Entry <sup>a</sup> | # of days<br>[Ph <sub>3</sub> C][B(C <sub>6</sub> F <sub>5</sub> ) <sub>4</sub> ] is<br>stored on benchtop | Aryl mol % <sup>b</sup> | PE mol % <sup>b</sup> |
|--------------------|------------------------------------------------------------------------------------------------------------|-------------------------|-----------------------|
| 1                  | 0                                                                                                          | 20                      | 80                    |
| 2                  | 1                                                                                                          | 20                      | 80                    |
| 3                  | 3                                                                                                          | 19                      | 81                    |
| 4                  | 7                                                                                                          | 19                      | 81                    |
| 5                  | 14                                                                                                         | 18                      | 82                    |
| 6                  | 30                                                                                                         | 13                      | 87                    |
| 7                  | 71                                                                                                         | 20                      | 80                    |

<sup>a</sup>30-minute reactions were performed with 0.25 mol% of the catalyst and 1.5eq of Et<sub>3</sub>SiH at 110°C using dried toluene as the aromatic solvent. Initiator mol% relative to moles of PVC. Et<sub>3</sub>SiH equivalence relative to PVC. <sup>b</sup>Calculated from <sup>1</sup>H NMR spectra taken in CDCl<sub>3</sub>.

**Table S3** Additional replicate runs of PVC to poly(ethylene-co-toluene)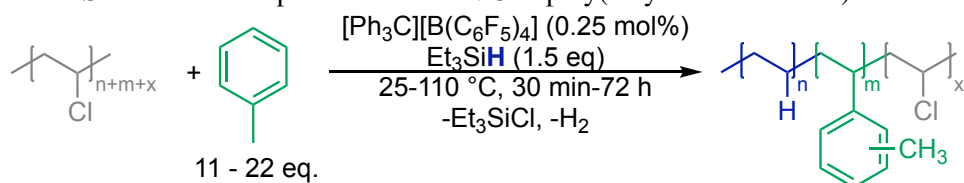

| Entry <sup>a</sup> | Reaction time (h) | Temp (°C) | PE mol % <sup>b</sup> | Aryl mol % <sup>b</sup> | PVC mol % <sup>b</sup> | T <sub>g</sub> (°C) <sup>c</sup> |
|--------------------|-------------------|-----------|-----------------------|-------------------------|------------------------|----------------------------------|
| 1a                 | 0.5               | 110       | 79                    | 21                      | 0                      | 69                               |
| 1b                 | 0.5               | 110       | 81                    | 19                      | 0                      | 79                               |
| 2a                 | 1                 | 80        | 79                    | 21                      | 0                      | 83                               |
| 2b                 | 1                 | 80        | 83                    | 17                      | 0                      | -                                |
| 2c                 | 1                 | 80        | 80                    | 20                      | 0                      | 79                               |
| 3a                 | 1                 | 60        | 79                    | 21                      | 0                      | 91                               |
| 3b                 | 1                 | 60        | 78                    | 22                      | 0                      | -                                |
| 3c                 | 1                 | 60        | 81                    | 19                      | 0                      | 81                               |
| 4a                 | 72                | 25        | 85                    | 16                      | 0                      | 112                              |
| 4b                 | 72                | 25        | 86                    | 14                      | 0                      | -                                |
| 4c                 | 72                | 25        | 80                    | 20                      | 0                      | 106                              |
| 5a <sup>d</sup>    | 2                 | 110       | 42                    | 13                      | 45                     | -                                |
| 5b <sup>d</sup>    | 2                 | 110       | 54                    | 10                      | 36                     | -                                |
| 6a <sup>c</sup>    | 18                | 110       | 78                    | 22                      | 0                      | 80                               |
| 6b <sup>c</sup>    | 18                | 110       | 79                    | 21                      | 0                      | -                                |

<sup>a</sup>Reactions were performed with 0.25 mol% of the catalyst, Et<sub>3</sub>SiH at 110°C using dried toluene as the aromatic solvent. Initiator mol% relative to moles of PVC. Et<sub>3</sub>SiH equivalence relative to PVC. <sup>b</sup>Calculated from <sup>1</sup>H NMR spectra taken in CDCl<sub>3</sub>. <sup>c</sup>Glass transition peak in second heating curve of DSC. <sup>d</sup>Silane was added slowly throughout the reaction. <sup>e</sup>22 equiv. toluene was used.

**Table S4** Additional replicate runs using TMDS as silane source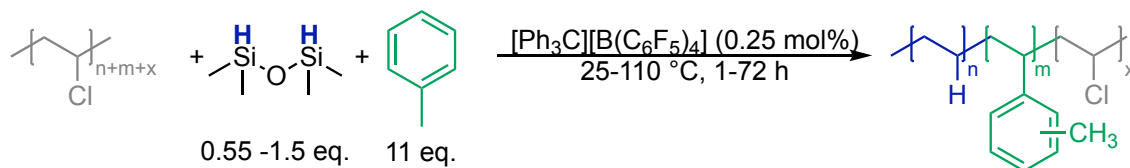

| Entry <sup>a</sup> | TMDS eq. | Reaction time (h) | Temp (°C) | PE mol% <sup>b</sup> | Aryl mol% <sup>b</sup> | PVC mol% <sup>b</sup> | T <sub>g</sub> (°C) <sup>c</sup> |
|--------------------|----------|-------------------|-----------|----------------------|------------------------|-----------------------|----------------------------------|
| 1a                 | 0.75     | 1                 | 110       | 25                   | 17                     | 58                    | -                                |
| 1b                 | 0.75     | 1                 | 110       | 49                   | 16                     | 35                    | -                                |
| 2a                 | 1        | 1                 | 110       | 74                   | 24                     | 2                     | -                                |
| 2b                 | 1        | 1                 | 110       | 79                   | 21                     | 0                     | 69                               |
| 3a                 | 1.1      | 1                 | 110       | 78                   | 22                     | 0                     | 74                               |
| 3b                 | 1.1      | 1                 | 110       | 77                   | 23                     | 0                     | -                                |
| 4a                 | 1.5      | 1                 | 110       | 77                   | 23                     | 0                     | 72                               |
| 4b                 | 1.5      | 1                 | 110       | 78                   | 22                     | 0                     | -                                |
| 4c                 | 1.5      | 1                 | 110       | 78                   | 22                     | 0                     | -                                |
| 5                  | 1.1      | 1                 | 60        | 78                   | 22                     | 0                     | 88                               |
| 6                  | 1.1      | 72                | 25        | 82                   | 18                     | 0                     | 101                              |
| 7                  | 0.55     | 22                | 110       | 44                   | 13                     | 43                    | -                                |
| 8                  | 0.55     | 1                 | 110       | 39                   | 11                     | 50                    | -                                |
| 9                  | 0.55     | 1                 | 60        | 45                   | 16                     | 41                    | -                                |
| 10                 | 0.55     | 2                 | 60        | 34                   | 11                     | 55                    | -                                |
| 11                 | 0.55     | 6                 | 60        | 43                   | 13                     | 44                    | -                                |
| 12                 | 0.55     | 18                | 60        | 39                   | 12                     | 49                    | -                                |

<sup>a</sup>Reactions were performed using low molecular weight PVC with 0.25 mol% of the catalyst and 0.55-1.5 equivalents of TMDS in benzotoluene as the aromatic solvent. <sup>b</sup>Calculated from <sup>1</sup>H NMR spectra taken in CDCl<sub>3</sub>. <sup>c</sup>Glass transition peak in second heating curve of DSC.

**Table S5** Conversion of PVC to poly(ethylene-co-o-xylene)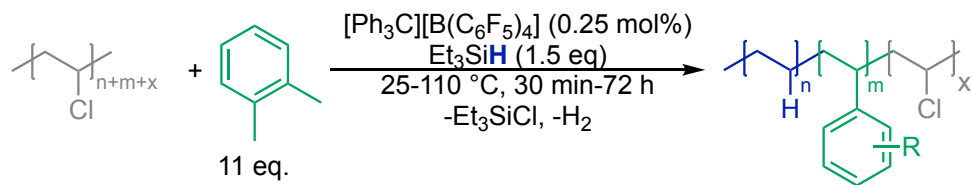

| Entry <sup>a</sup> | Reaction time | Temp (°C) | PE mol% <sup>b</sup> | Aryl mol% <sup>b</sup> | PVC mol% <sup>b</sup> | T <sub>g</sub> (°C) <sup>c</sup> |
|--------------------|---------------|-----------|----------------------|------------------------|-----------------------|----------------------------------|
| 1a                 | 30 min        | 110       | 79                   | 21                     | 0                     | 65                               |
| 1b                 | 30 min        | 110       | 80                   | 20                     | 0                     | -                                |
| 1c                 | 30 min        | 110       | 80                   | 20                     | 0                     | 79                               |
| 2a                 | 1 h           | 60        | 78                   | 22                     | 0                     | 76                               |
| 2b                 | 1 h           | 60        | 77                   | 23                     | 0                     | 80                               |
| 2c                 | 1 h           | 60        | 77                   | 23                     | 0                     | -                                |
| 3a                 | 72 h          | 25        | 79                   | 21                     | 0                     | 85                               |
| 3b                 | 72 h          | 25        | 78                   | 22                     | 0                     | -                                |
| 3c                 | 72 h          | 25        | 77                   | 23                     | 0                     | 87                               |

<sup>a</sup>Reactions were performed using low molecular weight PVC with 0.25 mol% of the catalyst and 1.5 equivalents of Et<sub>3</sub>SiH in dried ortho-xylene as the aromatic solvent. <sup>b</sup>Calculated from <sup>1</sup>H NMR spectra taken in CDCl<sub>3</sub>.

<sup>c</sup>Glass transition peak in second heating curve of DSC.

**Table S6** Conversion of PVC to poly(ethylene-co-m-xylene)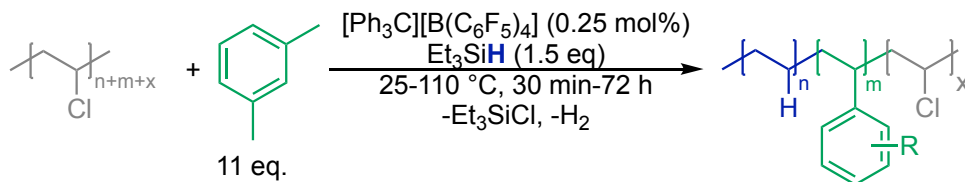

| Entry <sup>a</sup> | Reaction time | Temp (°C) | PE mol% <sup>b</sup> | Aryl mol% <sup>b</sup> | PVC mol% <sup>b</sup> | $T_g$ (°C) <sup>c</sup> |
|--------------------|---------------|-----------|----------------------|------------------------|-----------------------|-------------------------|
| 1a                 | 30 min        | 110       | 81                   | 19                     | 0                     | 69                      |
| 1b                 | 30 min        | 110       | 80                   | 20                     | 0                     | -                       |
| 1c                 | 30 min        | 110       | 80                   | 20                     | 0                     | 77                      |
| 2a                 | 1 h           | 60        | 81                   | 19                     | 0                     | 78                      |
| 2b                 | 1 h           | 60        | 79                   | 21                     | 0                     | -                       |
| 2c                 | 2 h           | 60        | 80                   | 20                     | 0                     | 75                      |
| 3a                 | 72 h          | 25        | 78                   | 22                     | 0                     | 77                      |
| 3b                 | 72 h          | 25        | 77                   | 23                     | 0                     | -                       |
| 3c                 | 72 h          | 25        | 87                   | 13                     | 0                     | 90                      |

<sup>a</sup>Reactions were performed using low molecular weight PVC with 0.25 mol% of the catalyst and 1.5 equivalents of  $\text{Et}_3\text{SiH}$  in dried meta-xylene as the aromatic solvent. <sup>b</sup>Calculated from  $^1\text{H}$  NMR spectra taken in  $\text{CDCl}_3$ . <sup>c</sup>Glass transition peak in second heating curve of DSC.

**Table S7** Conversion of PVC to poly(ethylene-co-p-ylene)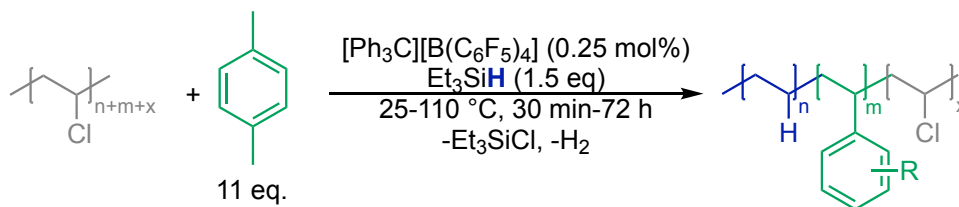

| Entry <sup>a</sup> | Reaction time | Temp (°C) | PE mol% <sup>b</sup> | Aryl mol% <sup>b</sup> | PVC mol% <sup>b</sup> | $T_g$ (°C) <sup>c</sup> |
|--------------------|---------------|-----------|----------------------|------------------------|-----------------------|-------------------------|
| 1a                 | 30 min        | 110       | 84                   | 16                     | 0                     | 60                      |
| 1b                 | 30 min        | 110       | 83                   | 17                     | 0                     | 71                      |
| 2a                 | 5 h           | 60        | 84                   | 16                     | 0                     | 80                      |
| 2b                 | 5 h           | 60        | 83                   | 17                     | 0                     | 93                      |
| 2c                 | 5 h           | 60        | 83                   | 17                     | 0                     | -                       |
| 3a                 | 72 h          | 25        | 86                   | 14                     | 0                     | 108                     |
| 3b                 | 72 h          | 25        | 90                   | 10                     | 0                     | 108                     |

<sup>a</sup>Reactions were performed using low molecular weight PVC with 0.25 mol% of the catalyst and 1.5 equivalents of  $\text{Et}_3\text{SiH}$  in dried para-xylene as the aromatic solvent. <sup>b</sup>Calculated from  $^1\text{H}$  NMR spectra taken in  $\text{CDCl}_3$ . <sup>c</sup>Glass transition peak in second heating curve of DSC.

**Table S8** Conversion of PVC to poly(ethylene-co-benzene)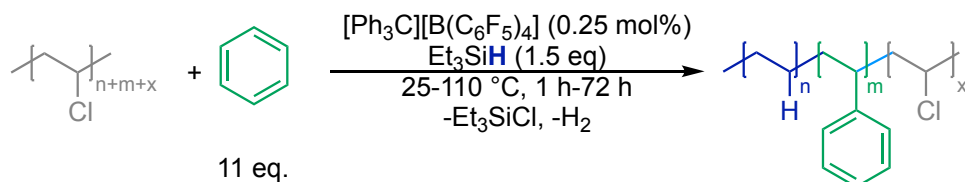

| Entry <sup>a</sup> | Reaction time (h) | Temp (°C) | PE mol% <sup>b</sup> | Aryl mol% <sup>b</sup> | PVC mol% <sup>b</sup> | <i>T<sub>g</sub></i> (°C) <sup>c</sup> |
|--------------------|-------------------|-----------|----------------------|------------------------|-----------------------|----------------------------------------|
| 1a <sup>d</sup>    | 1                 | 110       | 86                   | 14                     | 0                     | 70                                     |
| 1b <sup>d</sup>    | 1                 | 110       | 87                   | 13                     | 0                     | 79                                     |
| 2a                 | 1                 | 60        | 88                   | 12                     | 0                     | 103                                    |
| 2b                 | 1                 | 60        | 88                   | 12                     | 0                     | 91                                     |
| 3a                 | 72                | 25        | 89                   | 11                     | 0                     | 124                                    |
| 3b                 | 72                | 25        | 91                   | 9                      | 0                     | 125                                    |

<sup>a</sup>Reactions were performed using low molecular weight PVC with 0.25 mol% of the catalyst and 1.5 equivalents of Et<sub>3</sub>SiH in dried benzene as the aromatic solvent. <sup>b</sup>Calculated from <sup>1</sup>H NMR spectra taken in CDCl<sub>3</sub>. <sup>c</sup>Glass transition peak in second heating curve of DSC. <sup>d</sup>Reaction prepared in glovebox, performed in N<sub>2</sub> atmosphere. 0.5 mol% of catalyst was used instead of 0.25 mol%.

**Table S9** Conversion of PVC to poly(ethylene-co-mesitylene)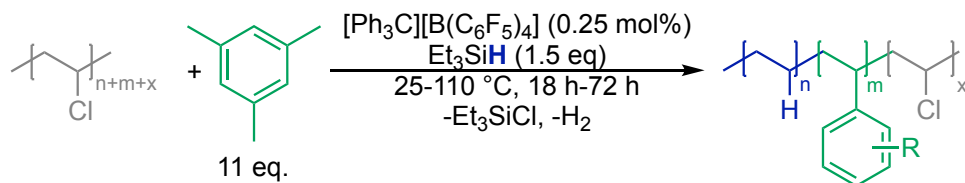

| Entry <sup>a</sup> | Reaction time (h) | Temp (°C) | PE mol% <sup>b</sup> | Aryl mol% <sup>b</sup> | PVC mol% <sup>b</sup> | <i>T<sub>g</sub></i> (°C) <sup>c</sup> |
|--------------------|-------------------|-----------|----------------------|------------------------|-----------------------|----------------------------------------|
| 1a                 | 18                | 110       | 88                   | 12                     | 0                     | 52                                     |
| 1b                 | 18                | 110       | 88                   | 12                     | 0                     | 49                                     |
| 2a                 | 18                | 60        | 86                   | 14                     | 0                     | 64                                     |
| 2b                 | 18                | 60        | 87                   | 13                     | 0                     | 63                                     |
| 3a <sup>d</sup>    | 72                | 25        | 86                   | 14                     | 0                     | 73                                     |
| 3b <sup>d</sup>    | 72                | 25        | 85                   | 15                     | 0                     | 77                                     |

<sup>a</sup>Reactions were performed using low molecular weight PVC with 0.25 mol% of the catalyst and 1.5 equivalents of Et<sub>3</sub>SiH in dried benzene as the aromatic solvent. <sup>b</sup>Calculated from <sup>1</sup>H NMR spectra taken in CDCl<sub>3</sub>. <sup>c</sup>Glass transition peak in second heating curve of DSC. <sup>d</sup>0.5 mol% of catalyst was used instead of 0.25 mol%.

**Table S10** Conversion of PVC to poly(ethylene-co-toluene) from different MW PVC substrates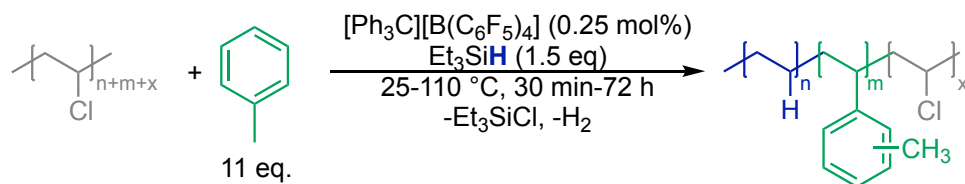

| Entry <sup>a</sup> | Reaction time | Temp (°C) | PVC substrate | PE mol% <sup>b</sup> | Aryl mol% <sup>b</sup> | PVC mol% <sup>b</sup> | <i>T<sub>g</sub></i> (°C) <sup>c</sup> |
|--------------------|---------------|-----------|---------------|----------------------|------------------------|-----------------------|----------------------------------------|
| 1a                 | 30 min        | 110       | 35 kg/mol     | 81                   | 19                     | 0                     | 81                                     |
| 1b                 | 30 min        | 110       | 35 kg/mol     | 80                   | 20                     | 0                     | 77                                     |
| 2a                 | 1 h           | 60        | 35 kg/mol     | 83                   | 17                     | 0                     | 91                                     |
| 2b                 | 1 h           | 60        | 35 kg/mol     | 79                   | 21                     | 0                     | 93                                     |
| 3a                 | 72 h          | 25        | 35 kg/mol     | 81                   | 19                     | 0                     | 102                                    |
| 3b                 | 72 h          | 25        | 35 kg/mol     | 79                   | 21                     | 0                     | 106                                    |
| 4a                 | 30 min        | 110       | 99 kg/mol     | 83                   | 17                     | 0                     | 59                                     |
| 4b                 | 30 min        | 110       | 99 kg/mol     | 80                   | 20                     | 0                     | 64                                     |
| 5a                 | 2 h           | 60        | 99 kg/mol     | 79                   | 21                     | 0                     | 102                                    |
| 5b                 | 2 h           | 60        | 99 kg/mol     | 79                   | 21                     | 0                     | 97                                     |
| 6a <sup>d</sup>    | 72 h          | 25        | 99 kg/mol     | 92                   | 8                      | 0                     | 123                                    |
| 6b <sup>d</sup>    | 72 h          | 25        | 99 kg/mol     | 92                   | 8                      | 0                     | 116                                    |

<sup>a</sup>Reactions were performed using desired PVC substrate with 0.25 mol% of the catalyst and 1.5 equivalents of Et<sub>3</sub>SiH in dried toluene as the aromatic solvent. <sup>b</sup>Calculated from <sup>1</sup>H NMR spectra taken in CDCl<sub>3</sub>. <sup>c</sup>Glass transition peak in second heating curve of DSC. <sup>d</sup>0.5 mol% of catalyst and 2.0 equiv of Et<sub>3</sub>SiH were used instead of 0.25 mol% and 1.5 equiv, respectively.

#### 4. $^1\text{H}$ NMR Data

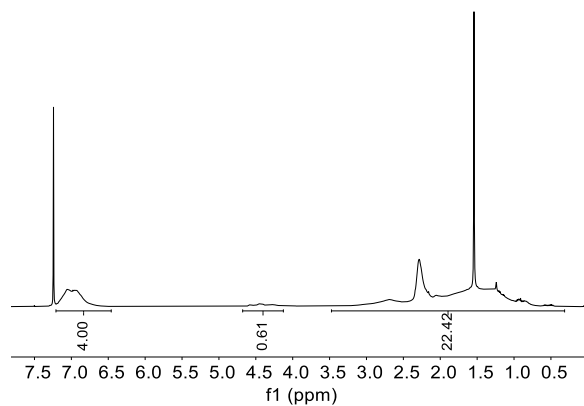

**Fig. S1**  $^1\text{H}$  NMR spectrum in  $\text{CDCl}_3$  of poly(vinyl chloride-co-ethylene-co-toluene) product in Table S1, Entry 1

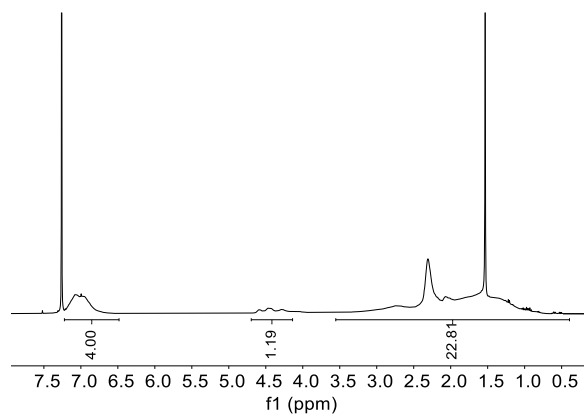

**Fig. S2**  $^1\text{H}$  NMR spectrum in  $\text{CDCl}_3$  of poly(vinyl chloride-co-ethylene-co-toluene) product in Table S1, Entry 2

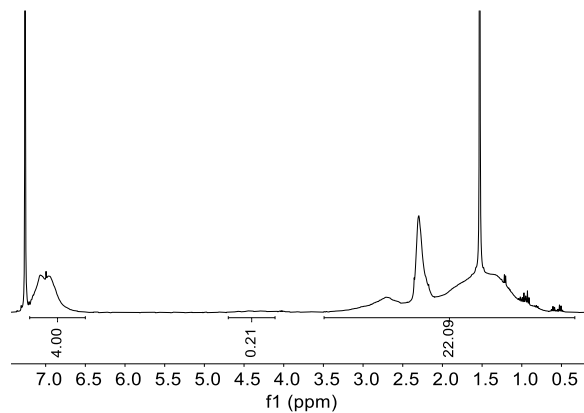

**Fig. S3**  $^1\text{H}$  NMR spectrum in  $\text{CDCl}_3$  of poly(vinyl chloride-co-ethylene-co-toluene) product in Table S1, Entry 3

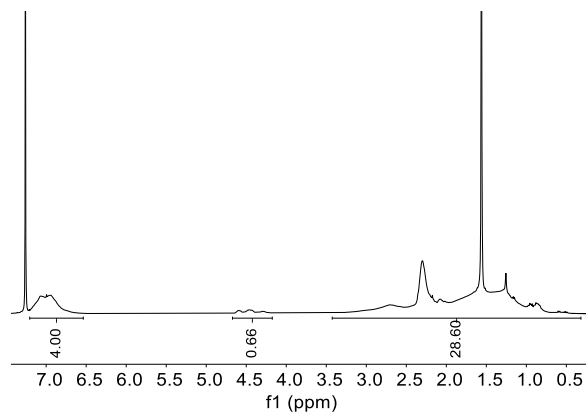

**Fig. S4**  $^1\text{H}$  NMR spectrum in  $\text{CDCl}_3$  of poly(vinyl chloride-co-ethylene-co-toluene) product in Table S1, Entry 4 and Table S3, Entry 1a

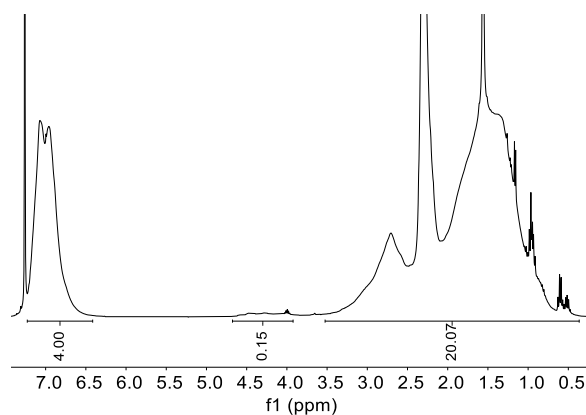

**Fig. S5**  $^1\text{H}$  NMR spectrum in  $\text{CDCl}_3$  of poly(vinyl chloride-co-ethylene-co-toluene) product in Table S1, Entry 5

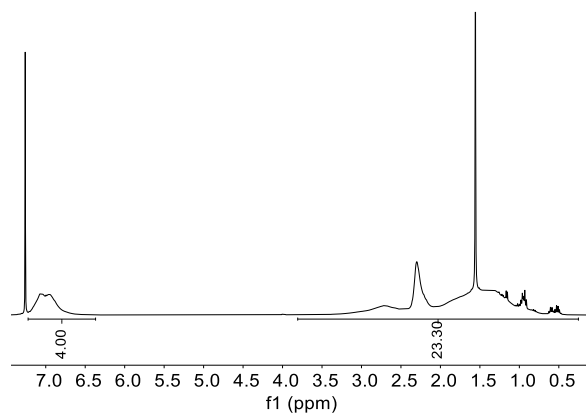

**Fig. S6**  $^1\text{H}$  NMR spectrum in  $\text{CDCl}_3$  of poly(ethylene-co-toluene) product in Table S1, Entry 6

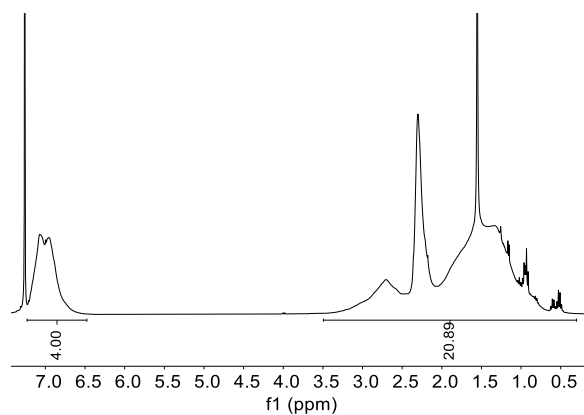

**Fig. S7** <sup>1</sup>H NMR spectrum in CDCl<sub>3</sub> of poly(ethylene-co-toluene) product in Table S1, Entry 7

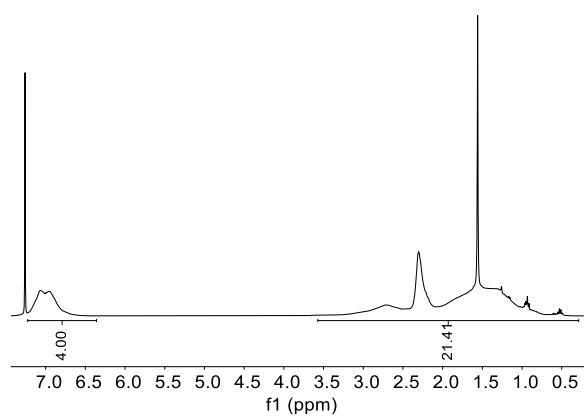

**Fig. S8** <sup>1</sup>H NMR spectrum in CDCl<sub>3</sub> of poly(ethylene-co-toluene) product in Table S2, Entry 1

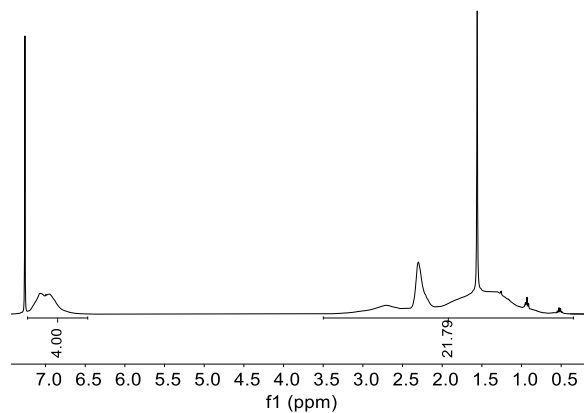

**Fig. S9** <sup>1</sup>H NMR spectrum in CDCl<sub>3</sub> of poly(ethylene-co-toluene) product in Table S2, Entry 2

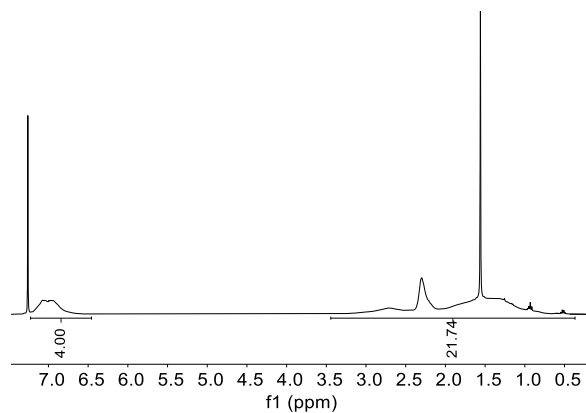

**Fig. S10**  $^1\text{H}$  NMR spectrum in  $\text{CDCl}_3$  of poly(ethylene-co-toluene) product in Table S2, Entry 3

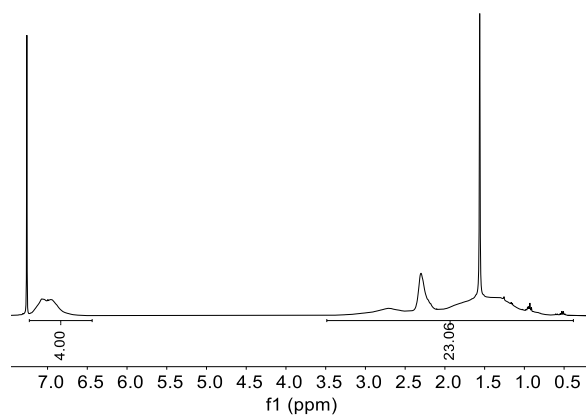

**Fig. S11**  $^1\text{H}$  NMR spectrum in  $\text{CDCl}_3$  of poly(ethylene-co-toluene) product in Table S2, Entry 4

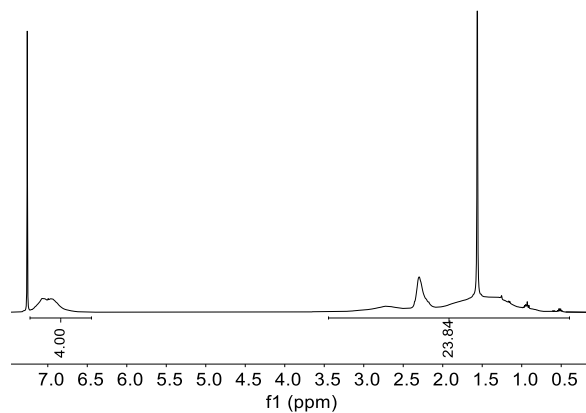

**Fig. S12**  $^1\text{H}$  NMR spectrum in  $\text{CDCl}_3$  of poly(ethylene-co-toluene) product in Table S2, Entry 5

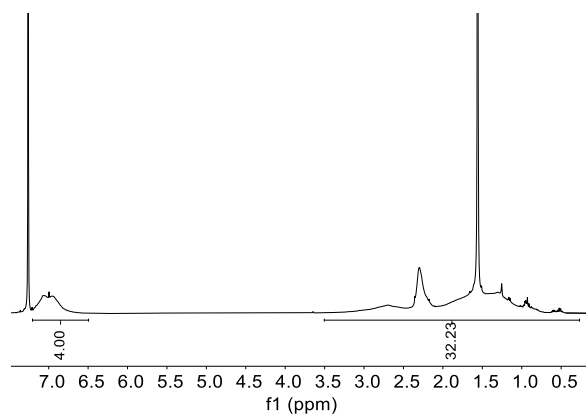

**Fig. S13**  $^1\text{H}$  NMR spectrum in  $\text{CDCl}_3$  of poly(ethylene-co-toluene) product in Table S2, Entry 6

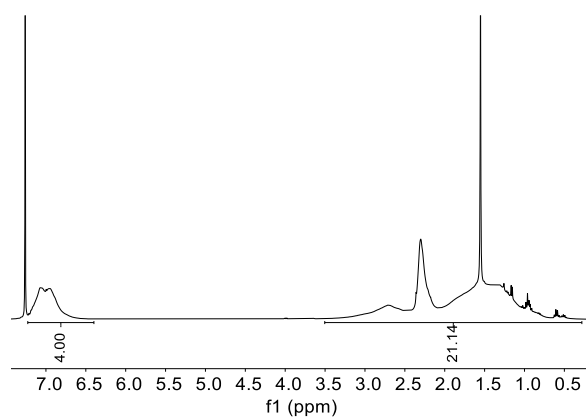

**Fig. S14**  $^1\text{H}$  NMR spectrum in  $\text{CDCl}_3$  of poly(ethylene-co-toluene) product in Table S2, Entry 7

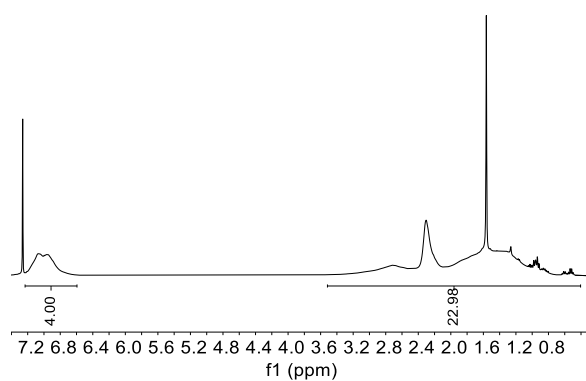

**Fig. S15**  $^1\text{H}$  NMR spectrum in  $\text{CDCl}_3$  of poly(ethylene-co-toluene) product in Table S3, Entry 1b

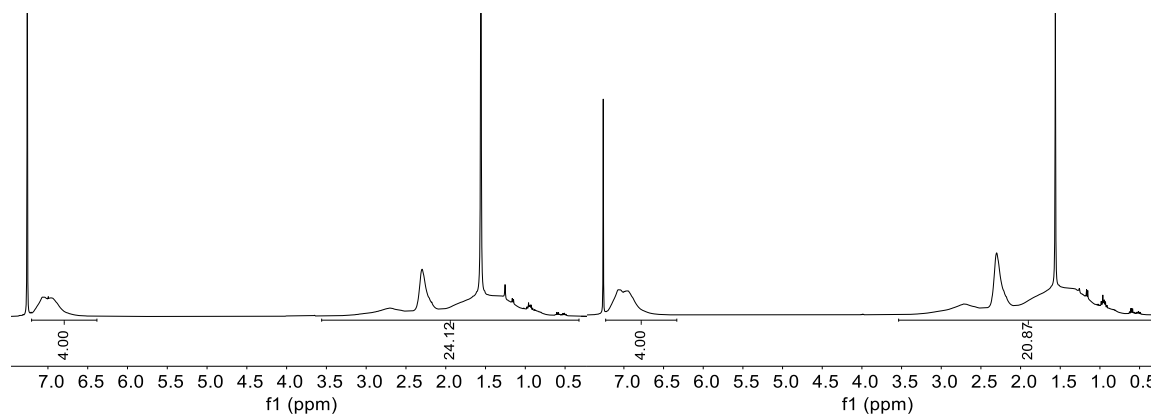

**Fig. S16**  $^1\text{H}$  NMR spectrum in  $\text{CDCl}_3$  of poly(ethylene-co-toluene) product in Table S3, Entry 2a (left) and 2b (right)

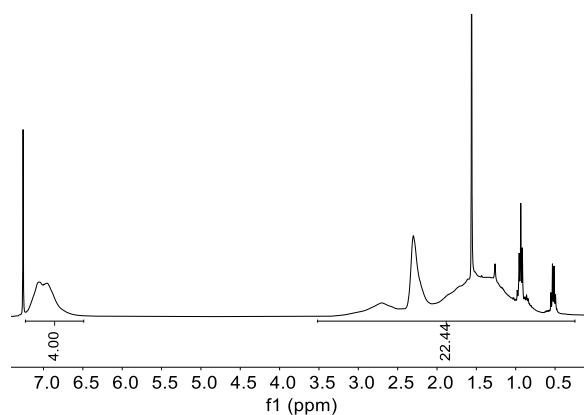

**Fig. S17**  $^1\text{H}$  NMR spectrum in  $\text{CDCl}_3$  of poly(ethylene-co-toluene) product in Table S3, Entry 2c

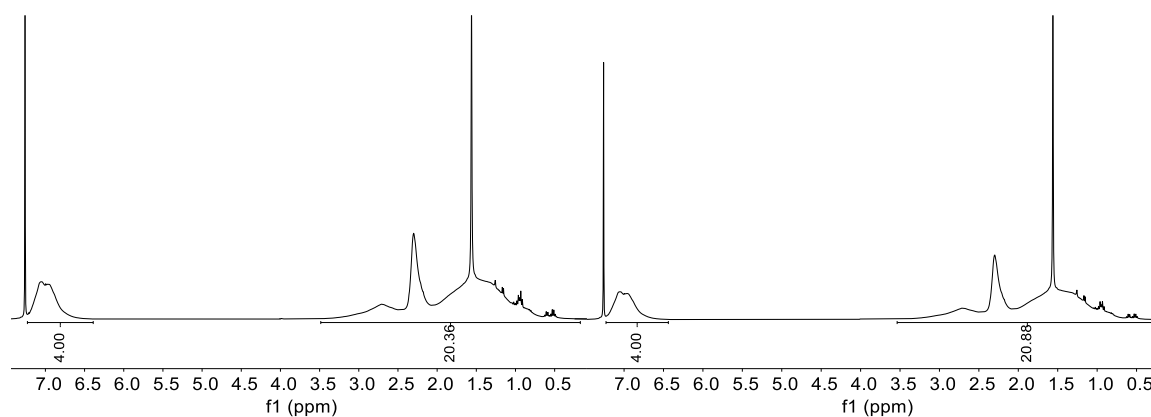

**Fig. S18**  $^1\text{H}$  NMR spectrum in  $\text{CDCl}_3$  of poly(ethylene-co-toluene) product in Table S3, Entry 3a (left) and 3b (right)

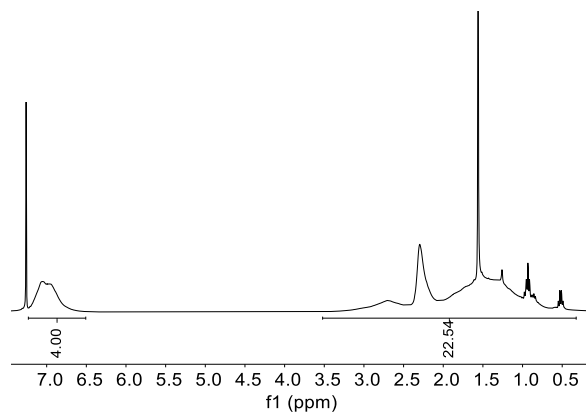

**Fig. S19**  $^1\text{H}$  NMR spectrum in  $\text{CDCl}_3$  of poly(ethylene-co-toluene) product in Table S3, Entry 3c

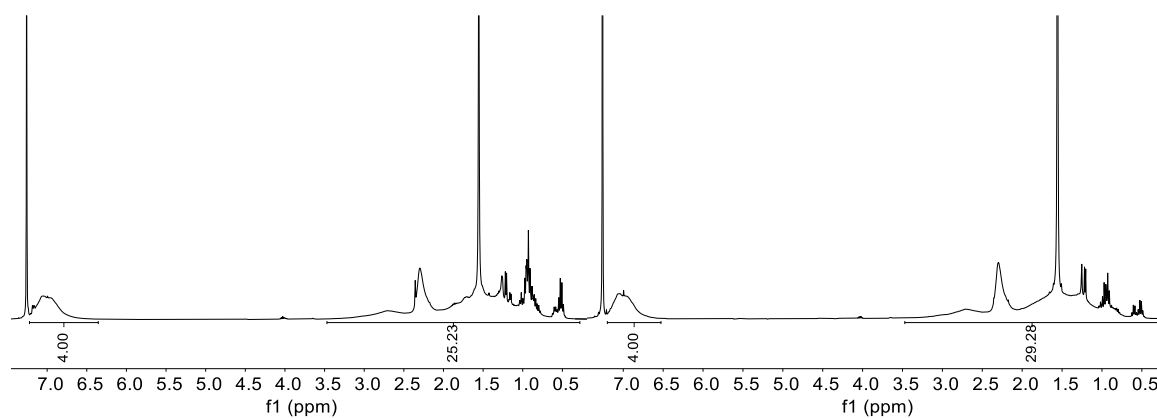

**Fig. S20**  $^1\text{H}$  NMR spectrum in  $\text{CDCl}_3$  of poly(ethylene-co-toluene) product in Table S3, Entry 4a (left) and 4b (right)

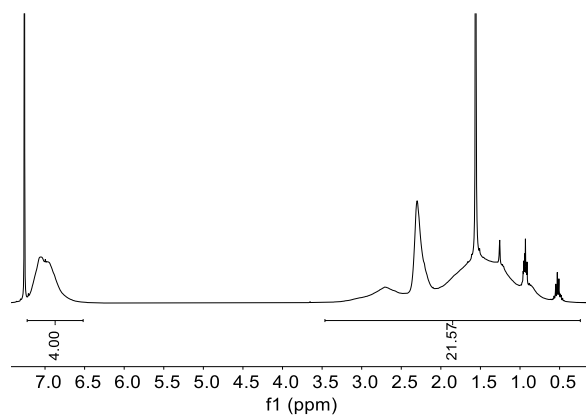

**Fig. S21**  $^1\text{H}$  NMR spectrum in  $\text{CDCl}_3$  of poly(ethylene-co-toluene) product in Table S3, Entry 4c

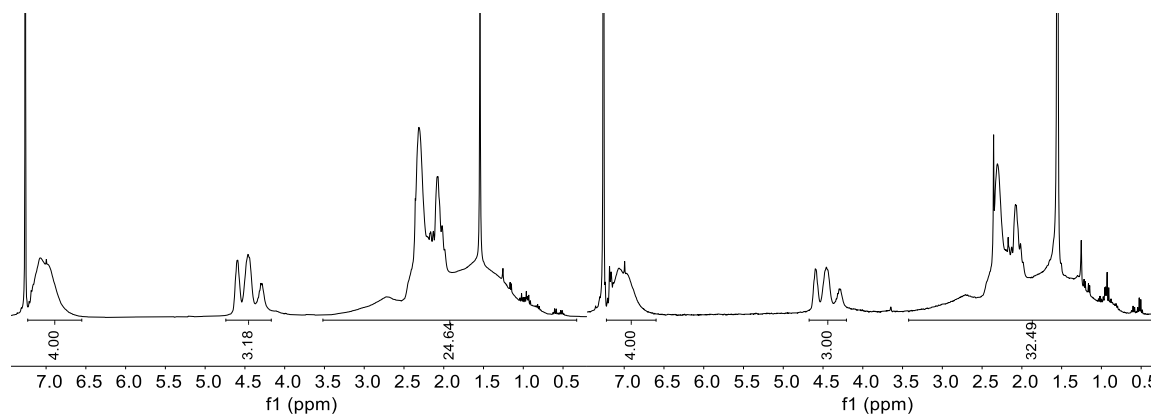

**Fig. S22** <sup>1</sup>H NMR spectrum in CDCl<sub>3</sub> of poly(vinyl chloride-co-ethylene-co-toluene) product in Table S3, Entry 5a (left) and 5b (right)

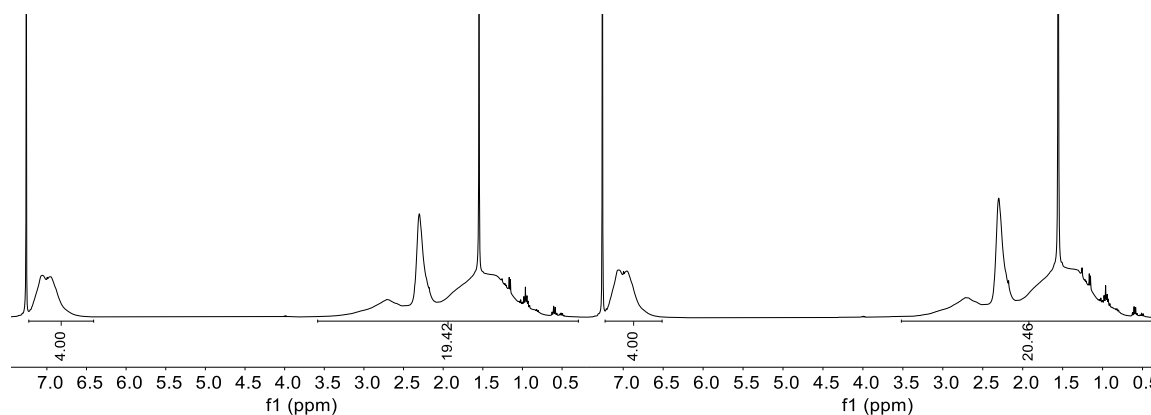

**Fig. S23** <sup>1</sup>H NMR spectrum in CDCl<sub>3</sub> of poly(ethylene-co-toluene) product in Table S3, Entry 6a (left) and 6b (right)

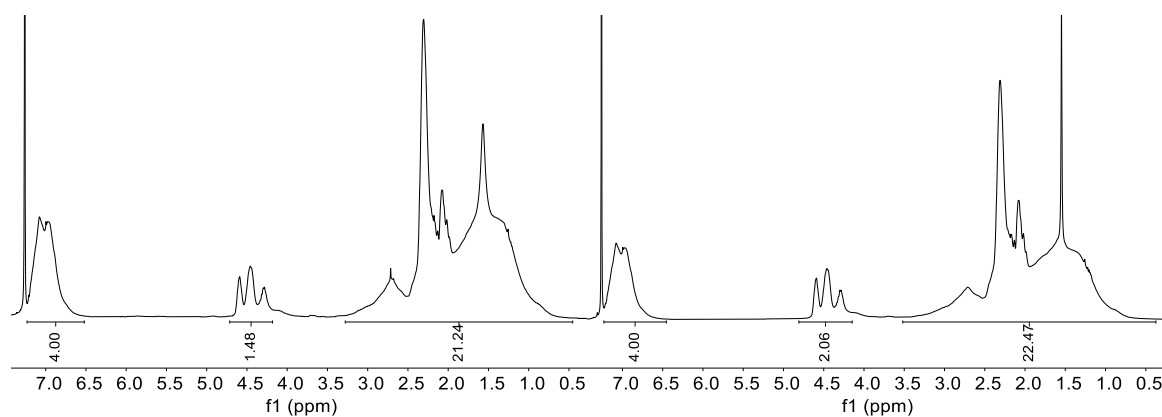

**Fig. S24** <sup>1</sup>H NMR spectrum in CDCl<sub>3</sub> of poly(vinyl chloride-co-ethylene-co-toluene) product in Table S4, Entry 1a (left) and 1b (right)

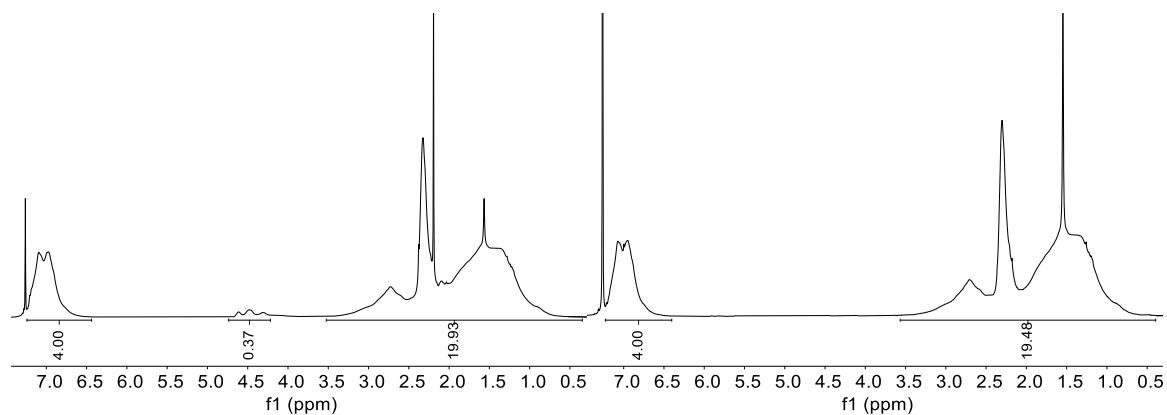

**Fig. S25**  $^1\text{H}$  NMR spectrum in  $\text{CDCl}_3$  of poly(vinyl chloride-co-ethylene-co-toluene) product in Table S4, Entry 2a (left) and 2b (right)

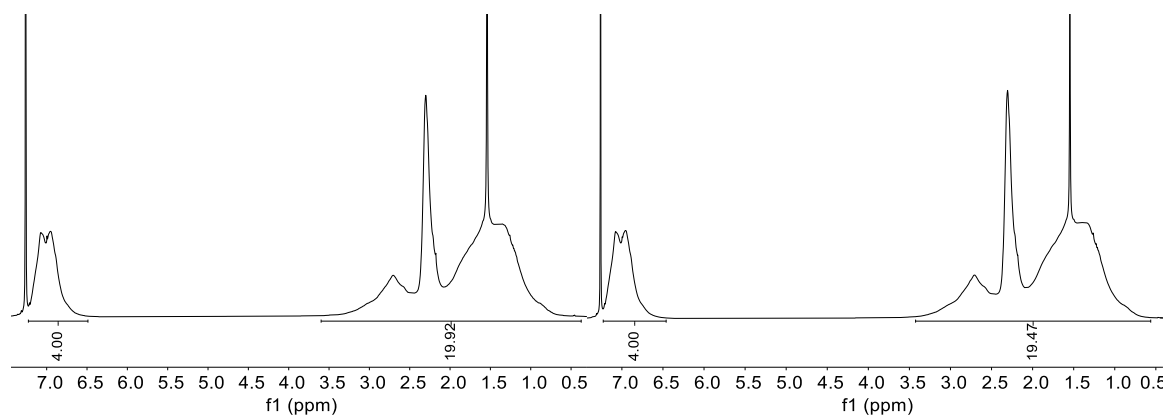

**Fig. S26**  $^1\text{H}$  NMR spectrum in  $\text{CDCl}_3$  of poly(ethylene-co-toluene) product in Table S4, Entry 3a (left) and 3b (right)

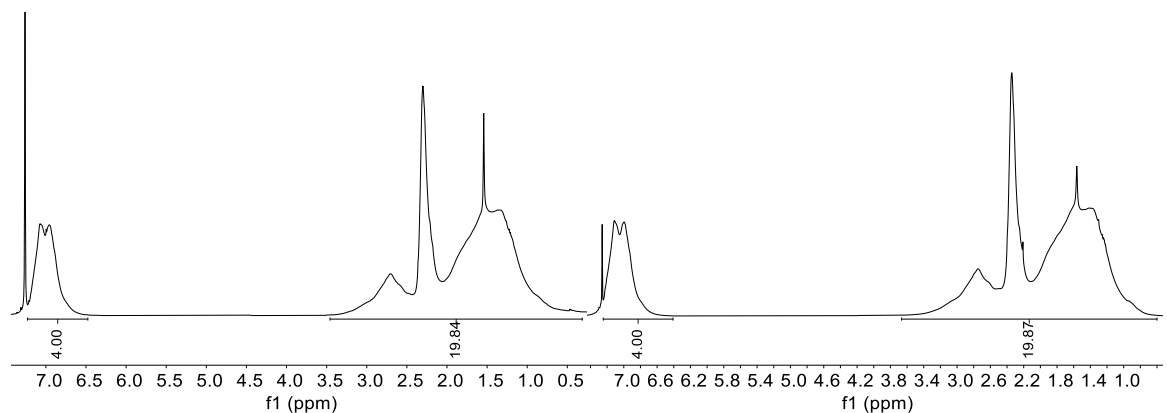

**Fig. S27**  $^1\text{H}$  NMR spectrum in  $\text{CDCl}_3$  of poly(ethylene-co-toluene) product in Table S4, Entry 4a (left) and 4b (right)

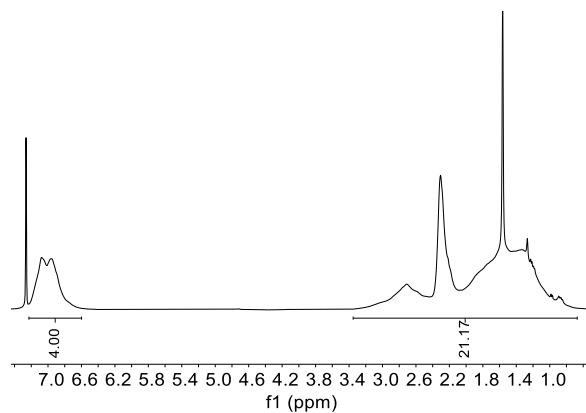

**Fig. S28**  $^1\text{H}$  NMR spectrum in  $\text{CDCl}_3$  of poly(ethylene-co-toluene) product in Table S4, Entry 4c

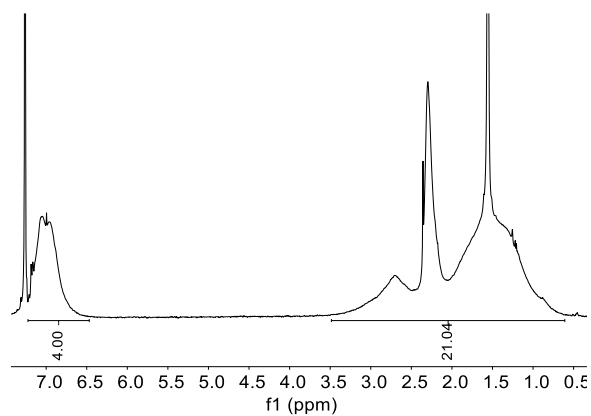

**Fig. S29**  $^1\text{H}$  NMR spectrum in  $\text{CDCl}_3$  of poly(ethylene-co-toluene) product in Table S4, Entry 5

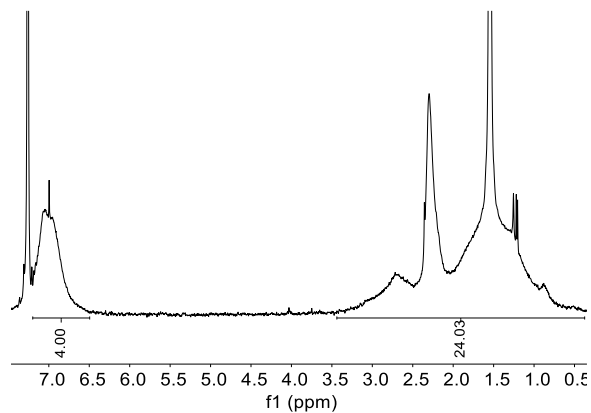

**Fig. S30**  $^1\text{H}$  NMR spectrum in  $\text{CDCl}_3$  of poly(ethylene-co-toluene) product in Table S4, Entry 6

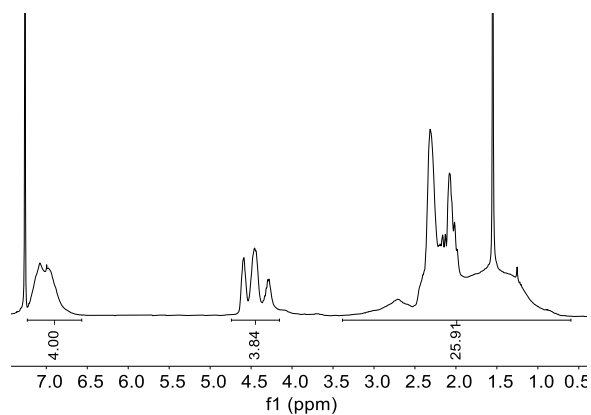

**Fig. S31**  $^1\text{H}$  NMR spectrum in  $\text{CDCl}_3$  of poly(vinyl chloride-co-ethylene-co-toluene) product in Table S4, Entry 7 and Table 2, Entry 1

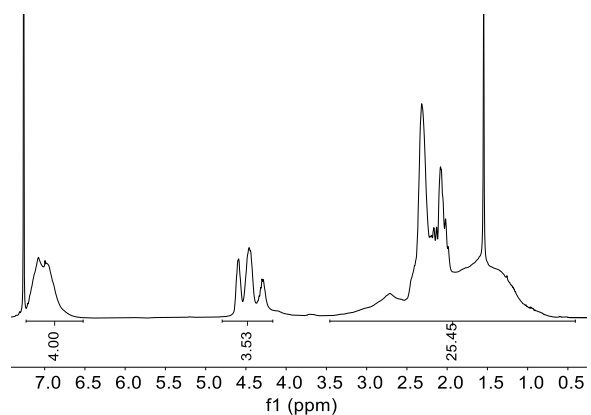

**Fig. S32**  $^1\text{H}$  NMR spectrum in  $\text{CDCl}_3$  of poly(vinyl chloride-co-ethylene-co-toluene) product in Table S4, Entry 8 and Table 2, Entry 2

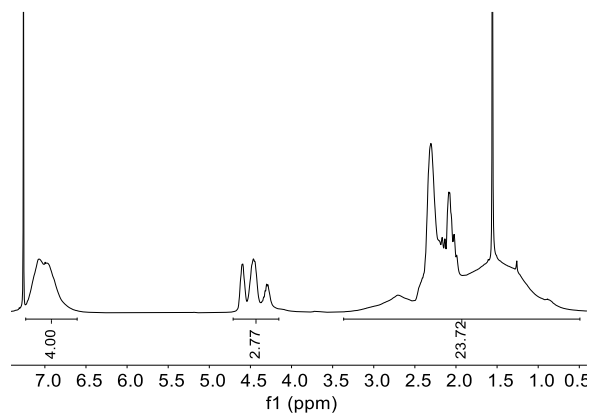

**Fig. S33**  $^1\text{H}$  NMR spectrum in  $\text{CDCl}_3$  of poly(vinyl chloride-co-ethylene-co-toluene) product in Table S4, Entry 9 and Table 2, Entry 7

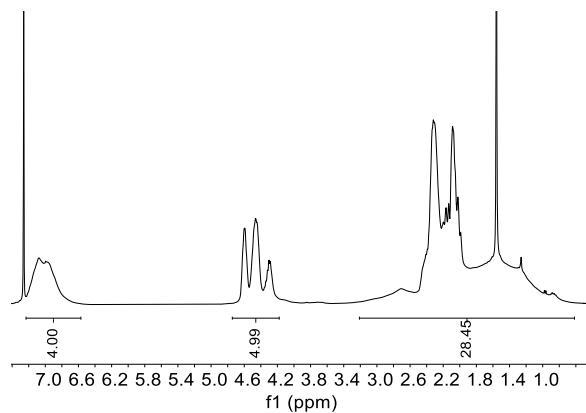

**Fig. S34** <sup>1</sup>H NMR spectrum in CDCl<sub>3</sub> of poly(vinyl chloride-co-ethylene-co-toluene) product in Table S4, Entry 10 and Table 2, Entry 8

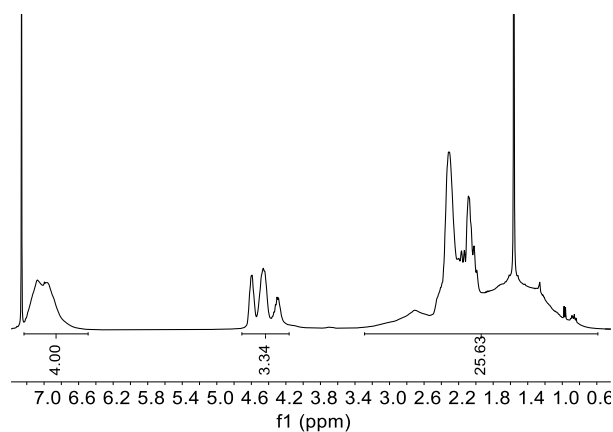

**Fig. S35** <sup>1</sup>H NMR spectrum in CDCl<sub>3</sub> of poly(vinyl chloride-co-ethylene-co-toluene) product in Table S4, Entry 11 and Table 2, Entry 9

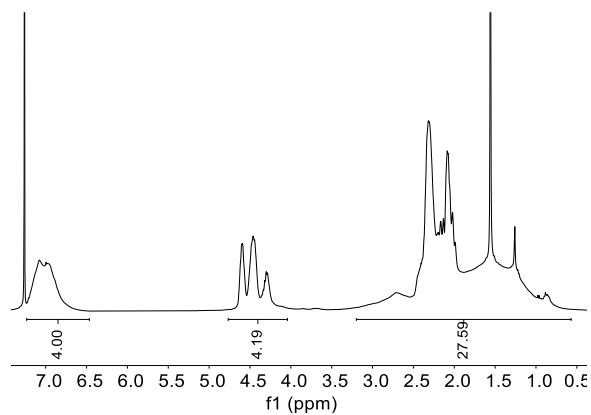

**Fig. S36** <sup>1</sup>H NMR spectrum in CDCl<sub>3</sub> of poly(vinyl chloride-co-ethylene-co-toluene) product in Table S4, Entry 12 and Table 2, Entry 10

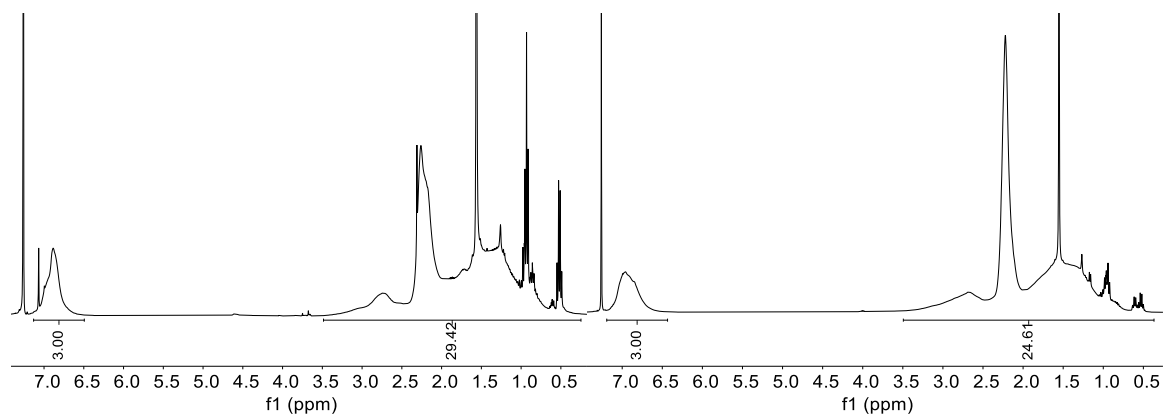

**Fig. S37**  $^1\text{H}$  NMR spectrum in  $\text{CDCl}_3$  of poly(ethylene-co-o-xylene) product in Table S5, Entry 1a (left) and 1b (right)

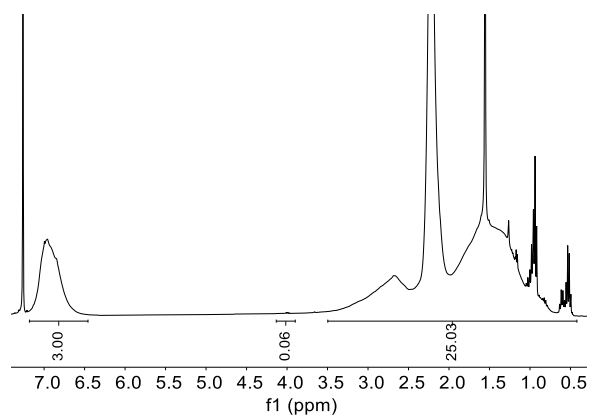

**Fig. S38**  $^1\text{H}$  NMR spectrum in  $\text{CDCl}_3$  of poly(ethylene-co-o-xylene) product in Table S5, Entry 1c

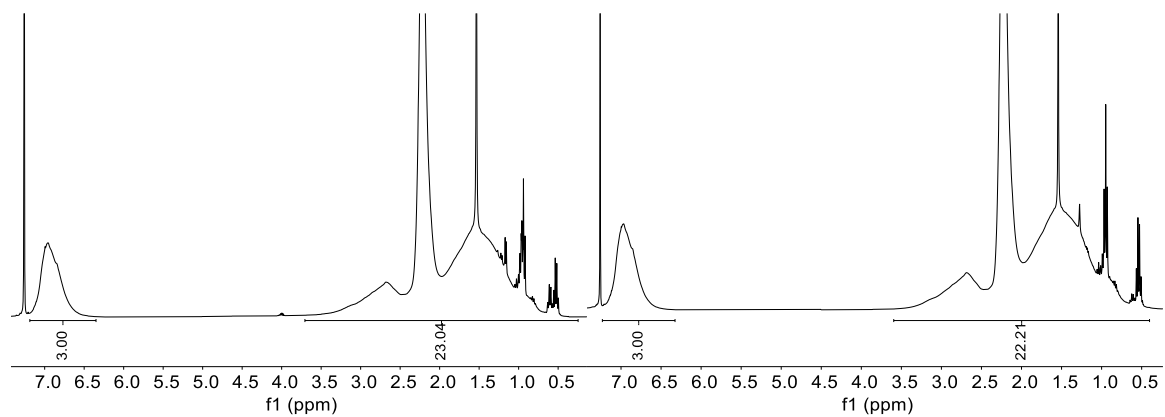

**Fig. S39**  $^1\text{H}$  NMR spectrum in  $\text{CDCl}_3$  of poly(ethylene-co-o-xylene) product in Table S5, Entry 2a (left) and 2b (right)

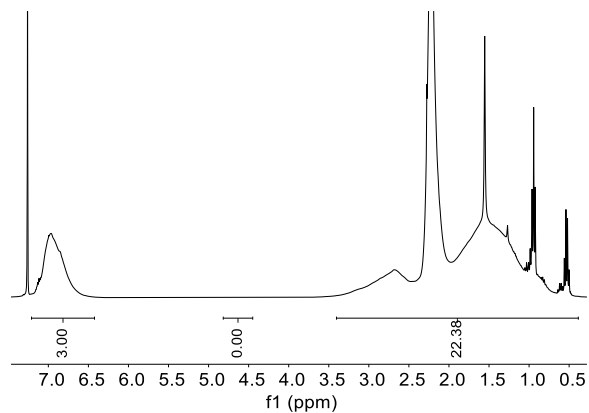

**Fig. S40** <sup>1</sup>H NMR spectrum in CDCl<sub>3</sub> of poly(ethylene-co-o-xylene) product in Table S5, Entry 2c

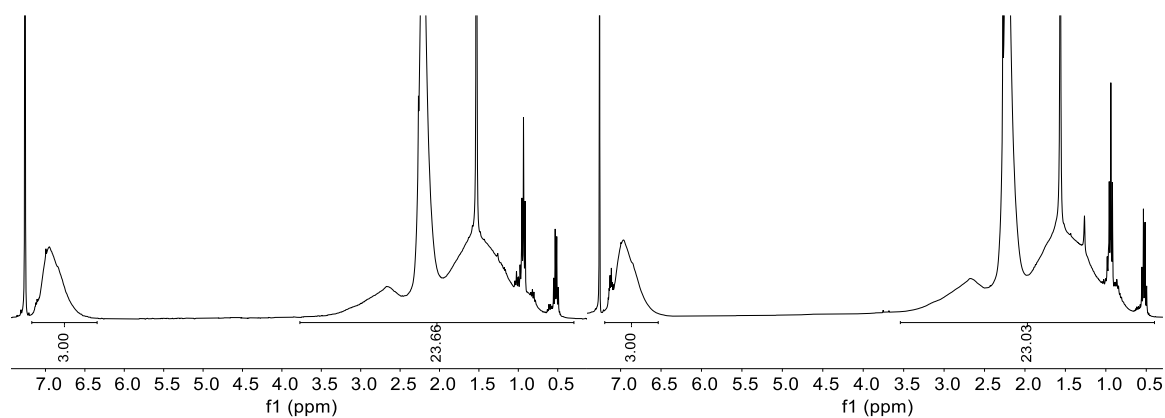

**Fig. S41** <sup>1</sup>H NMR spectrum in CDCl<sub>3</sub> of poly(ethylene-co-o-xylene) product in Table S5, Entry 3a (left) and 3b (right)

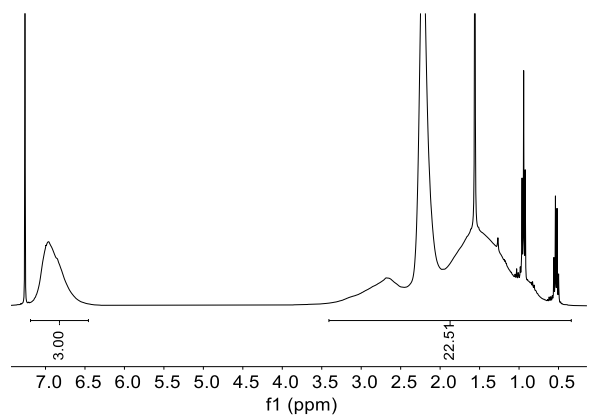

**Fig. S42** <sup>1</sup>H NMR spectrum in CDCl<sub>3</sub> of poly(ethylene-co-o-xylene) product in Table S5, Entry 3c

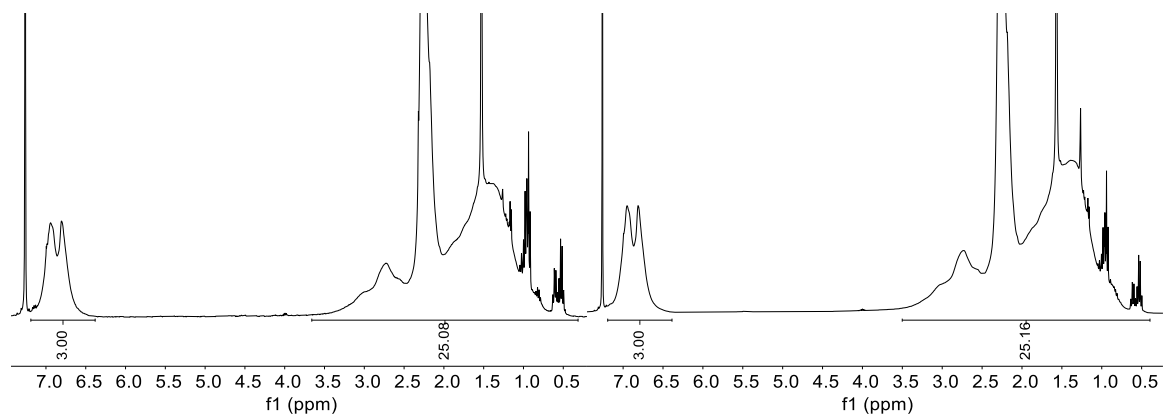

**Fig. S43**  $^1\text{H}$  NMR spectrum in  $\text{CDCl}_3$  of poly(ethylene-co-m-xylene) product in Table S6, Entry 1a (left) and 1b (right)

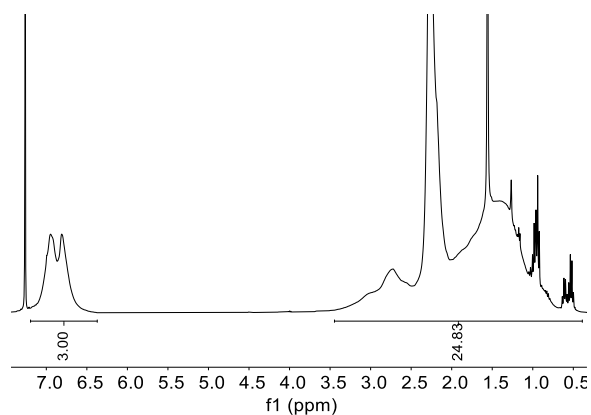

**Fig. S44**  $^1\text{H}$  NMR spectrum in  $\text{CDCl}_3$  of poly(ethylene-co-m-xylene) product in Table S6, Entry 1c

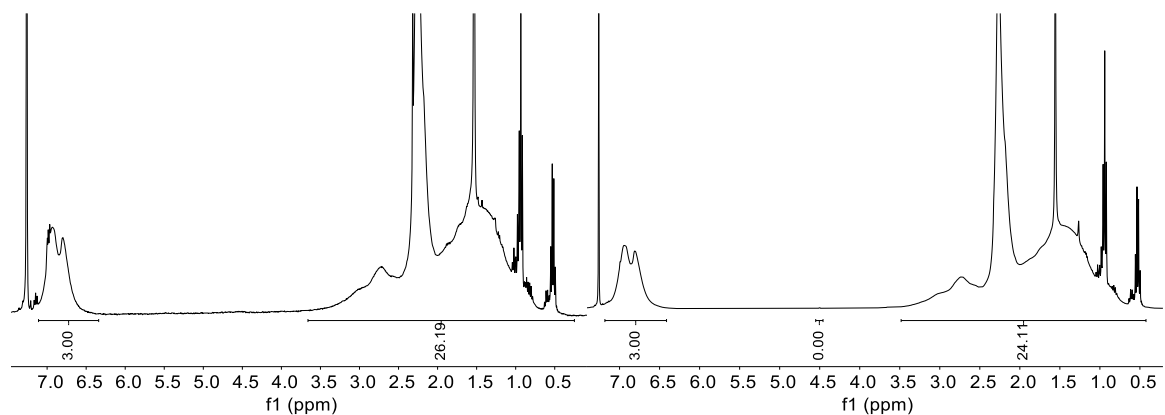

**Fig. S45**  $^1\text{H}$  NMR spectrum in  $\text{CDCl}_3$  of poly(ethylene-co-m-xylene) product in Table S6, Entry 2a (left) and 2b (right)

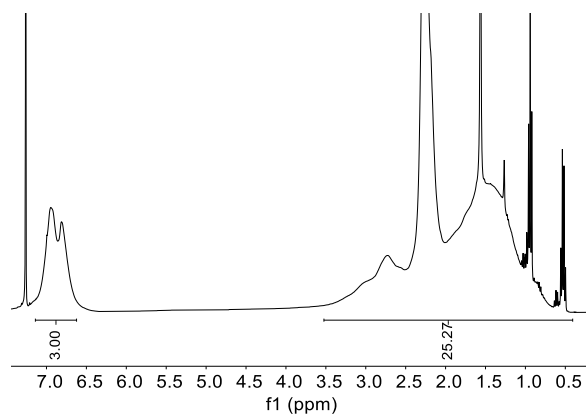

**Fig. S46**  $^1\text{H}$  NMR spectrum in  $\text{CDCl}_3$  of poly(ethylene-co-m-xylene) product in Table S6, Entry 2c

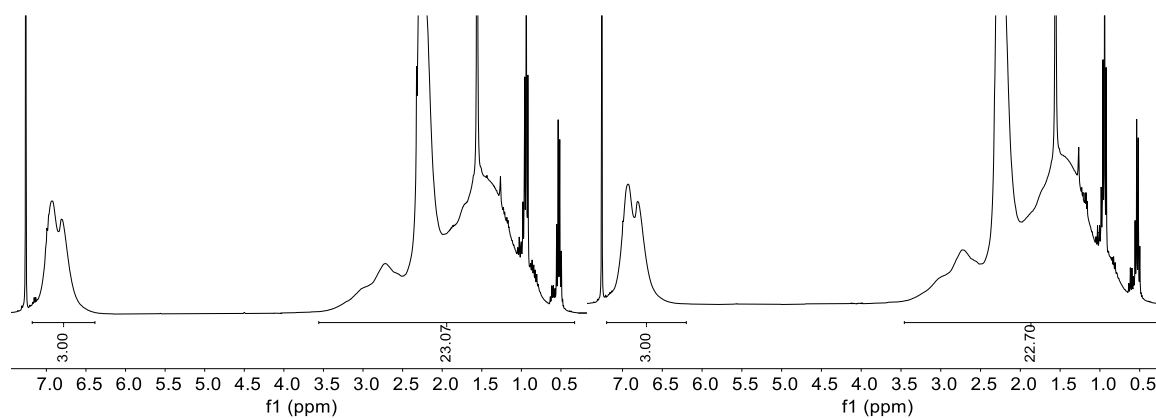

**Fig. S47**  $^1\text{H}$  NMR spectrum in  $\text{CDCl}_3$  of poly(ethylene-co-m-xylene) product in Table S6, Entry 3a (left) and 3b (right)

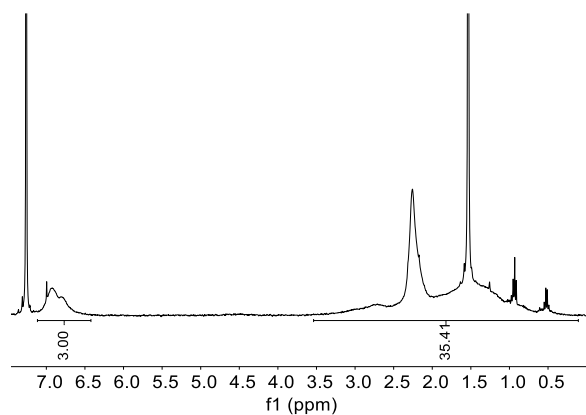

**Fig. S48**  $^1\text{H}$  NMR spectrum in  $\text{CDCl}_3$  of poly(ethylene-co-m-xylene) product in Table S6, Entry 3c

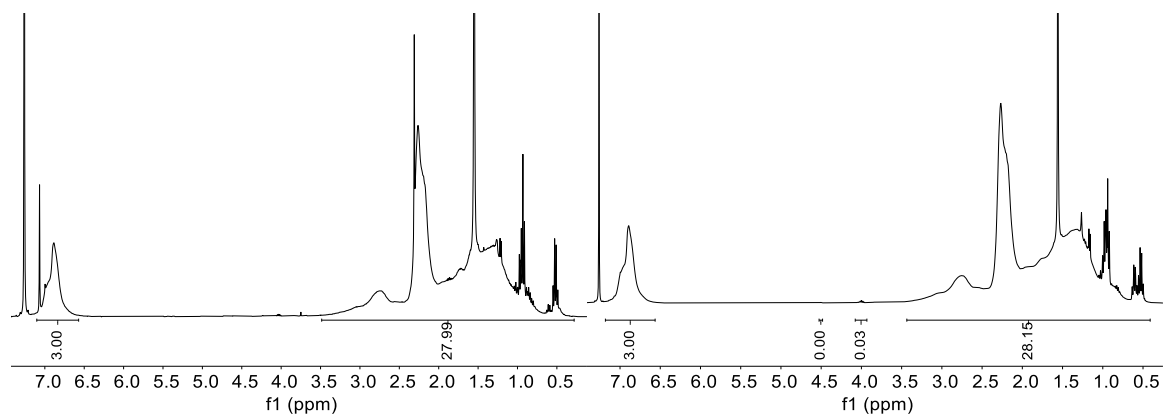

**Fig. S49**  $^1\text{H}$  NMR spectrum in  $\text{CDCl}_3$  of poly(ethylene-co-p-xylene) product in Table S7, Entry 1a (left) and 1b (right)

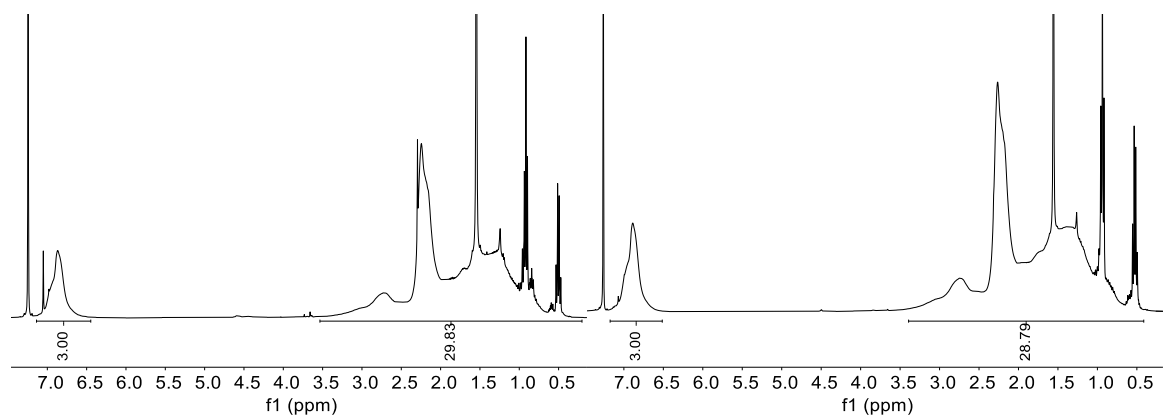

**Fig. S50**  $^1\text{H}$  NMR spectrum in  $\text{CDCl}_3$  of poly(ethylene-co-p-xylene) product in Table S7, Entry 2a (left) and 2b (right)

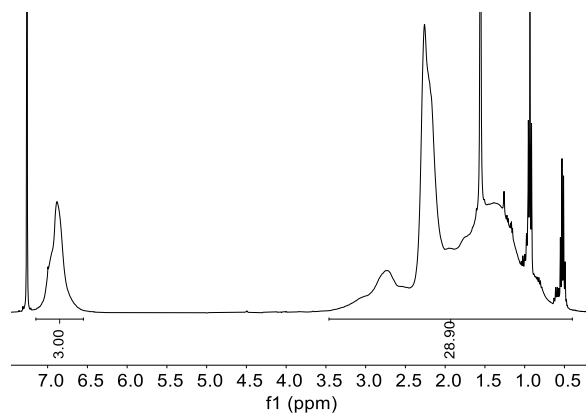

**Fig. S51**  $^1\text{H}$  NMR spectrum in  $\text{CDCl}_3$  of poly(ethylene-co-p-xylene) product in Table S7, Entry 2c

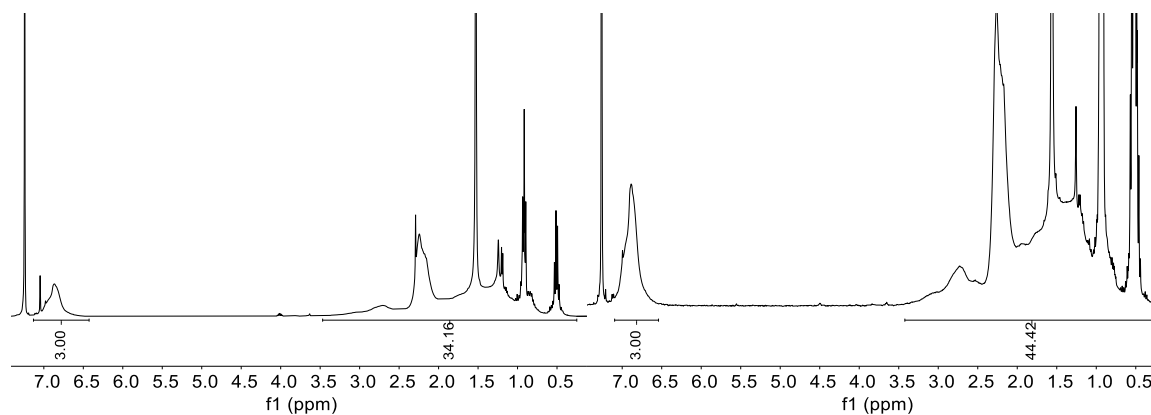

**Fig. S52**  $^1\text{H}$  NMR spectrum in  $\text{CDCl}_3$  of poly(ethylene-co-p-xylene) product in Table S7, Entry 3a (left) and 3b (right)

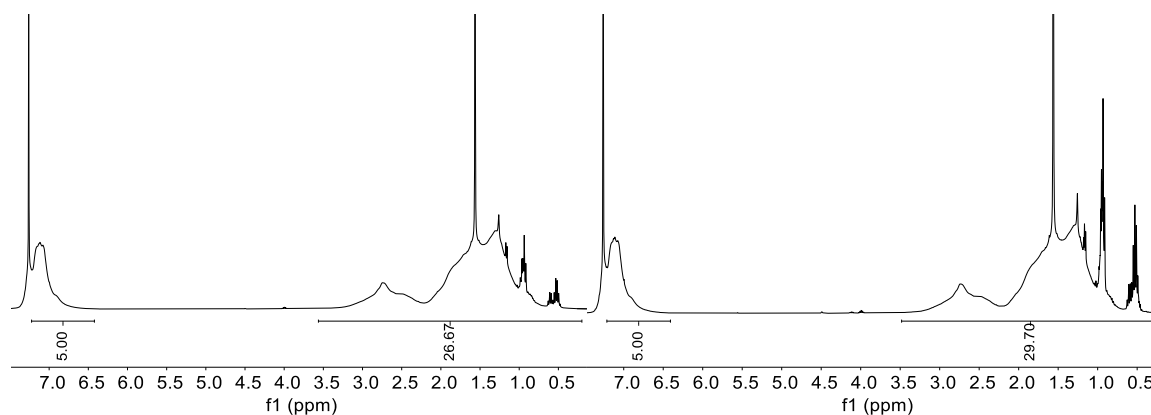

**Fig. S53**  $^1\text{H}$  NMR spectrum in  $\text{CDCl}_3$  of poly(ethylene-co-benzene) product in Table S8, Entry 1a (left) and 1b (right)

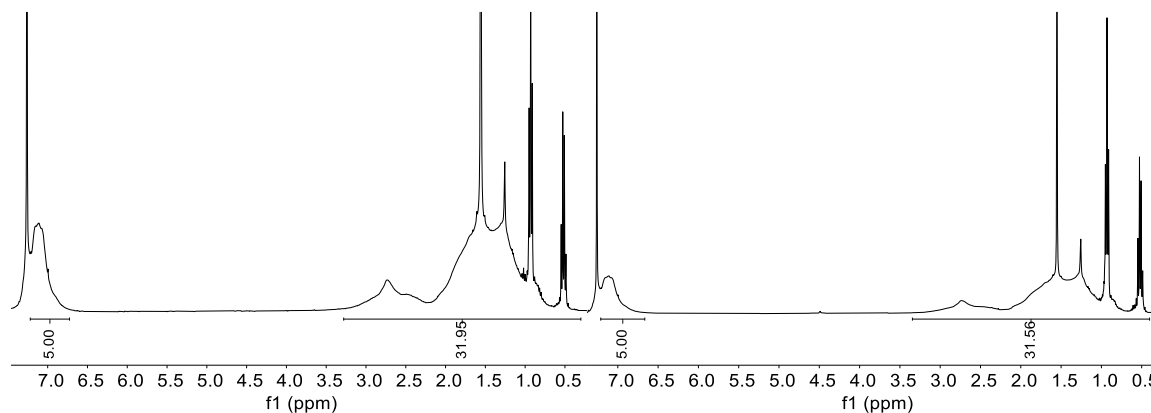

**Fig. S54**  $^1\text{H}$  NMR spectrum in  $\text{CDCl}_3$  of poly(ethylene-co-benzene) product in Table S8, Entry 2a (left) and 2b (right)

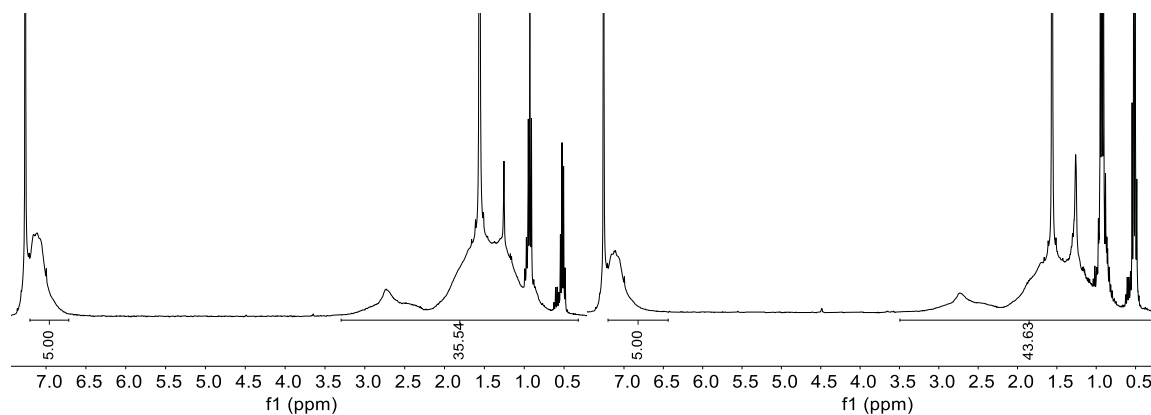

**Fig. S55**  $^1\text{H}$  NMR spectrum in  $\text{CDCl}_3$  of poly(ethylene-co-benzene) product in Table S8, Entry 3a (left) and 3b (right)

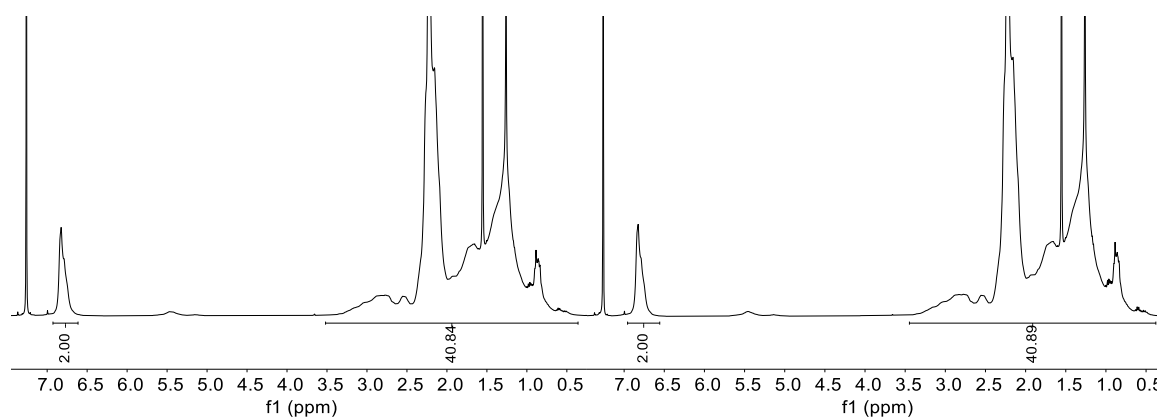

**Fig. S56**  $^1\text{H}$  NMR spectrum in  $\text{CDCl}_3$  of poly(ethylene-co-mesitylene) product in Table S9, Entry 1a (left) and 1b (right)

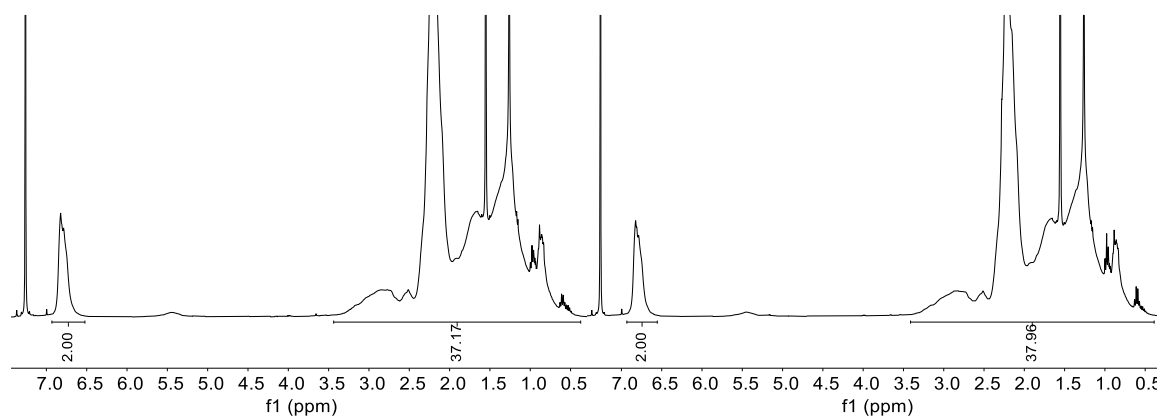

**Fig. S57**  $^1\text{H}$  NMR spectrum in  $\text{CDCl}_3$  of poly(ethylene-co-mesitylene) product in Table S9, Entry 2a (left) and 2b (right)

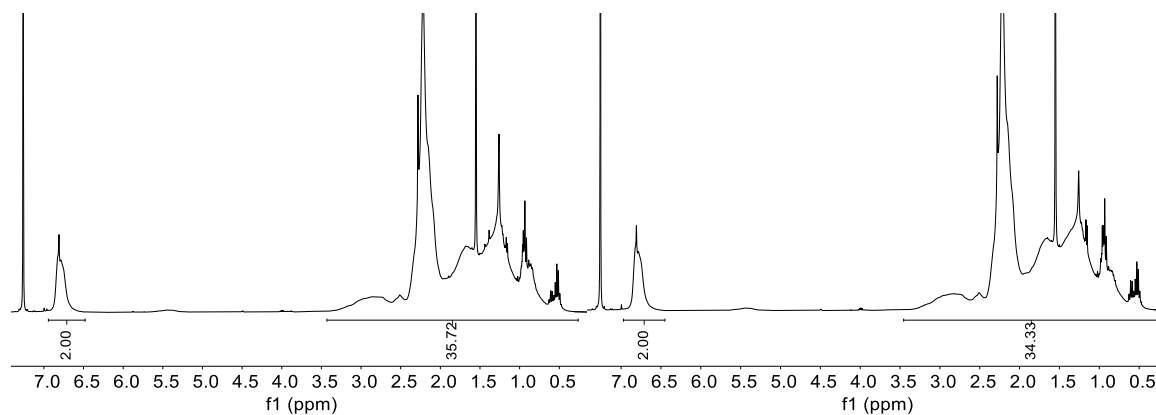

**Fig. S58**  $^1\text{H}$  NMR spectrum in  $\text{CDCl}_3$  of poly(ethylene-co-mesitylene) product in Table S9, Entry 3a (left) and 3b (right)

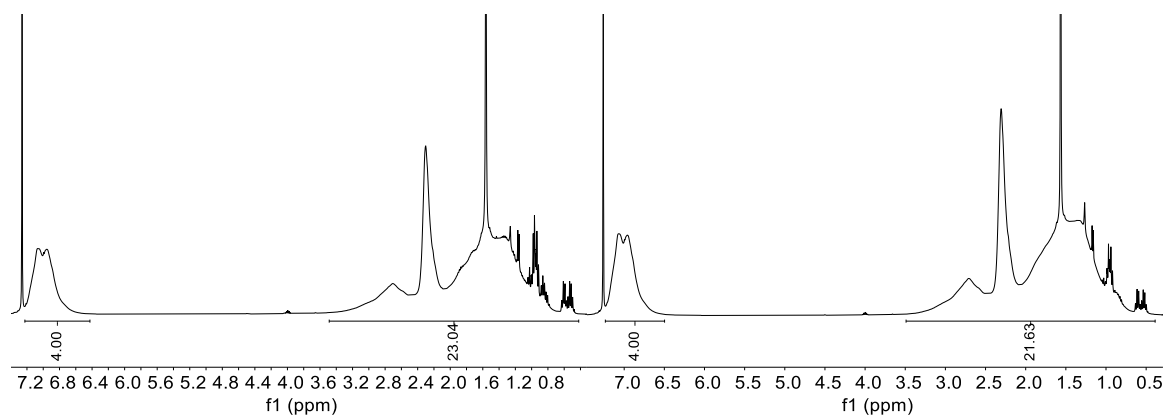

**Fig. S59**  $^1\text{H}$  NMR spectrum in  $\text{CDCl}_3$  of poly(ethylene-co-toluene) product in Table S10, Entry 1a (left) and 1b (right)

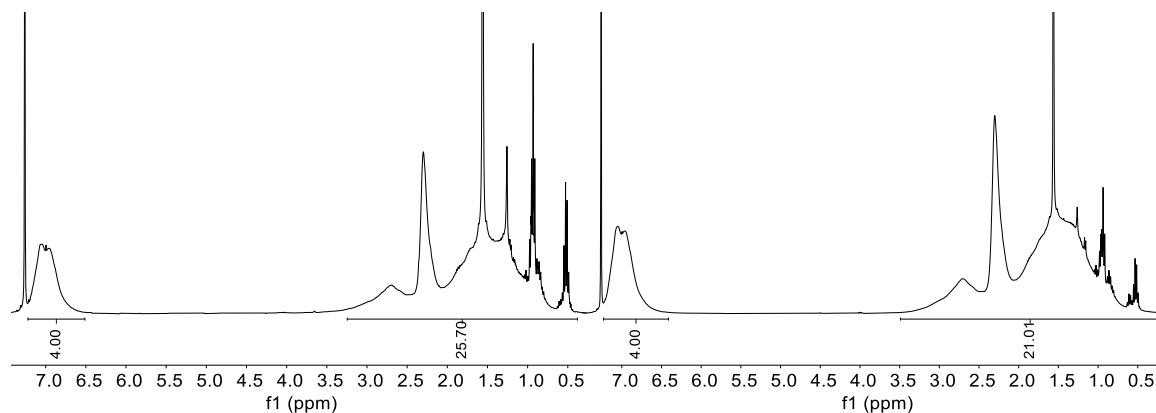

**Fig. S60**  $^1\text{H}$  NMR spectrum in  $\text{CDCl}_3$  of poly(ethylene-co-toluene) product in Table S10, Entry 2a (left) and 2b (right)

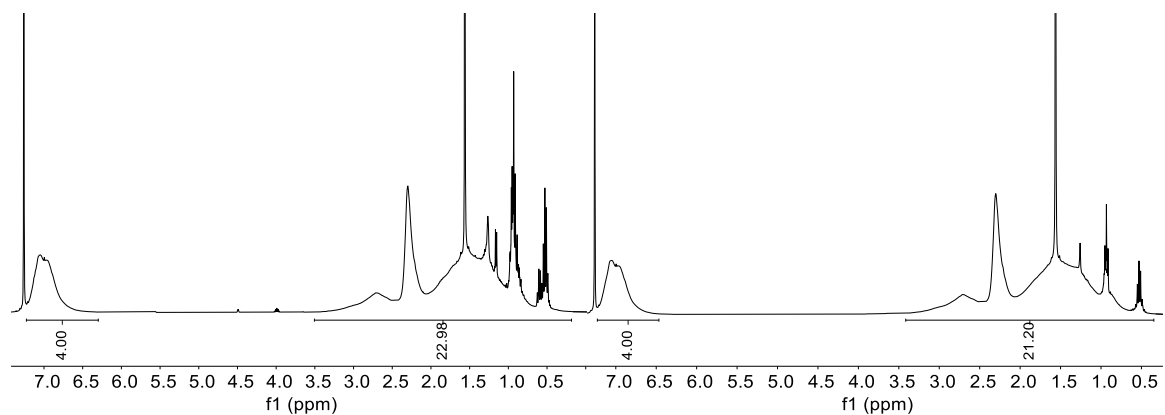

**Fig. S61** <sup>1</sup>H NMR spectrum in CDCl<sub>3</sub> of poly(ethylene-co-toluene) product in Table S10, Entry 3a (left) and 3b (right)

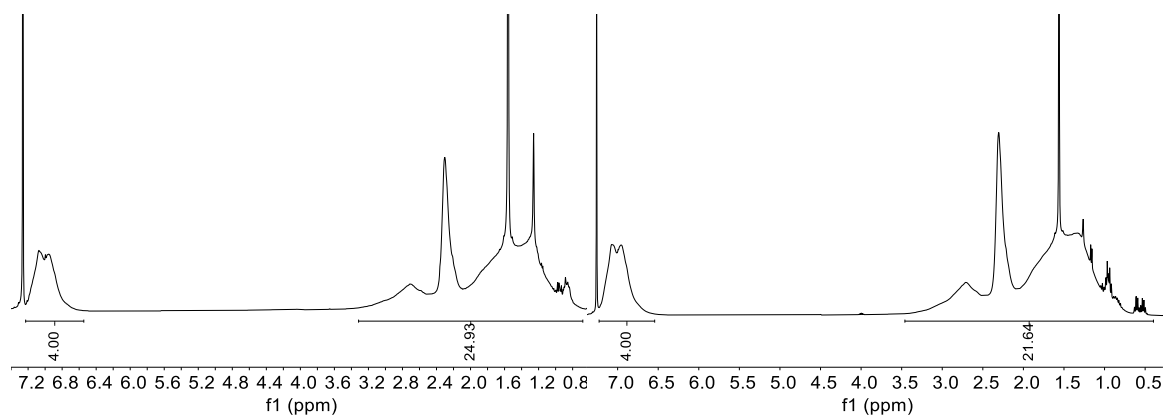

**Fig. S62** <sup>1</sup>H NMR spectrum in CDCl<sub>3</sub> of poly(ethylene-co-toluene) product in Table S10, Entry 4a (left) and 4b (right)

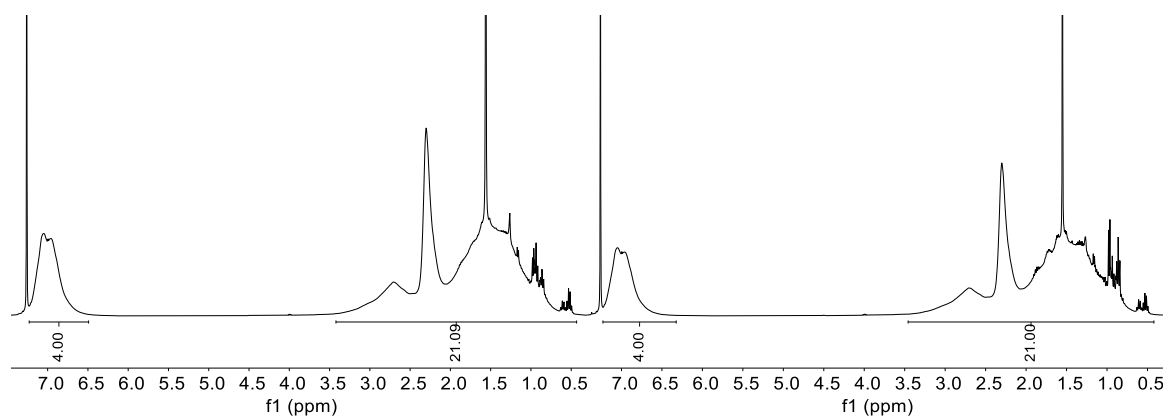

**Fig. S63** <sup>1</sup>H NMR spectrum in CDCl<sub>3</sub> of poly(ethylene-co-toluene) product in Table S10, Entry 5a (left) and 5b (right)

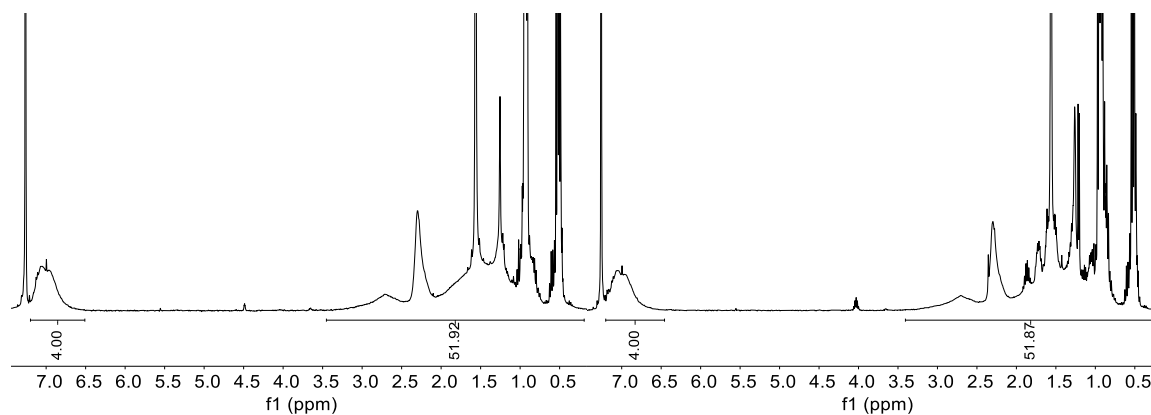

**Fig. S64**  $^1\text{H}$  NMR spectrum in  $\text{CDCl}_3$  of poly(ethylene-co-toluene) product in Table S10, Entry 6a (left) and 6b (right)

## 5. FT-IR Spectroscopy

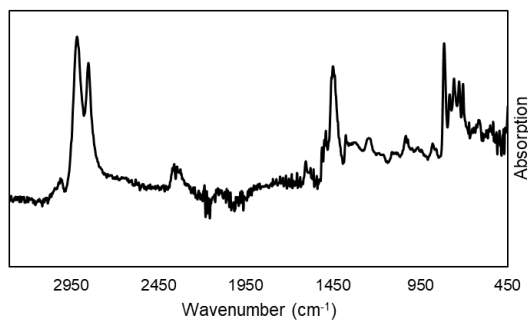

**Fig. S65** FT-IR spectrum of Table S1, Entry 1

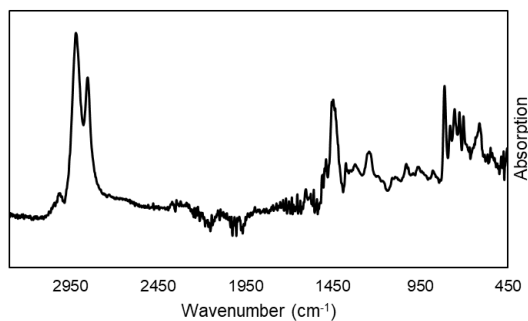

**Fig. S66** FT-IR spectrum of Table S1, Entry 2

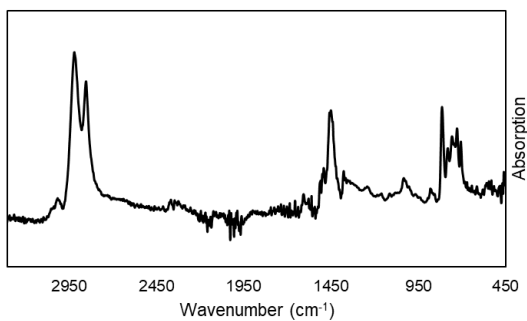

**Fig. S67** FT-IR spectrum of Table S1, Entry 3

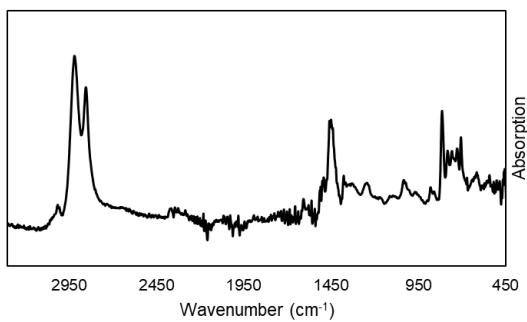

**Fig. S68** FT-IR spectrum of Table S1, Entry 4

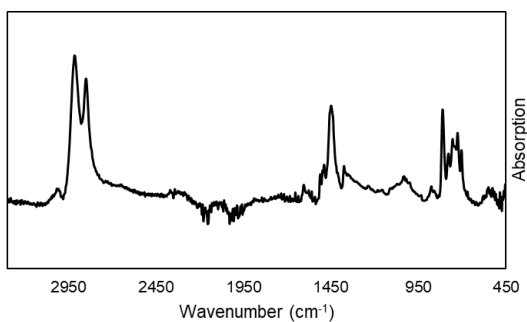

**Fig. S69** FT-IR spectrum of Table S1, Entry 7

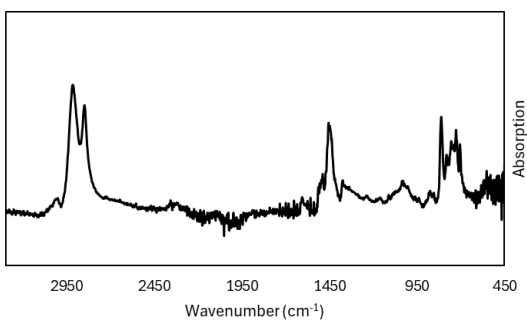

**Fig. S70** FT-IR spectrum of Table S2, Entry 1

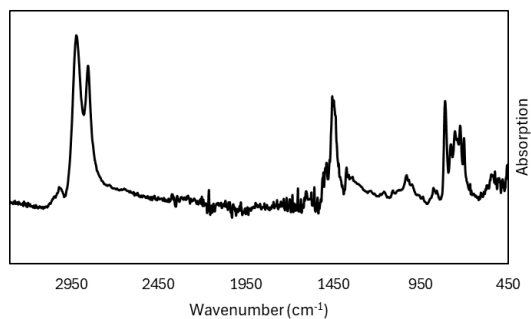

**Fig. S71** FT-IR spectrum of Table S2, Entry 2

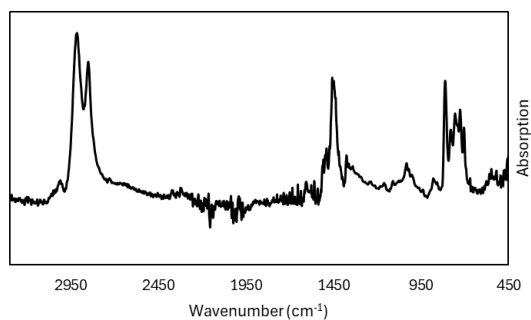

**Fig. S72** FT-IR spectrum of Table S2, Entry 3

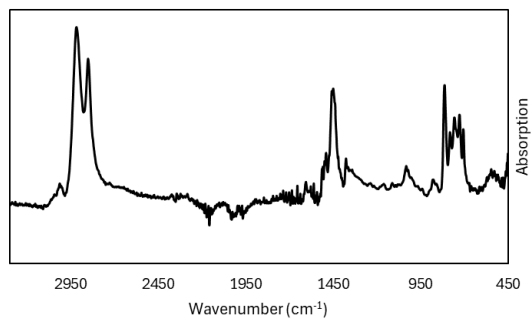

**Fig. S73** FT-IR spectrum of Table S2, Entry 4

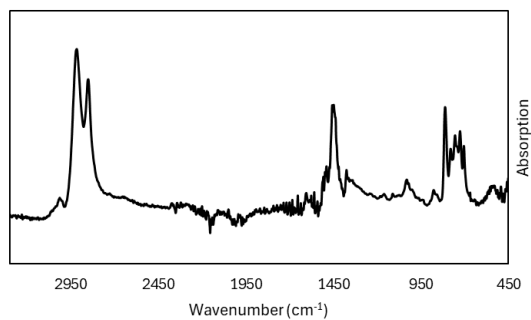

**Fig. S74** FT-IR spectrum of Table S2, Entry 5

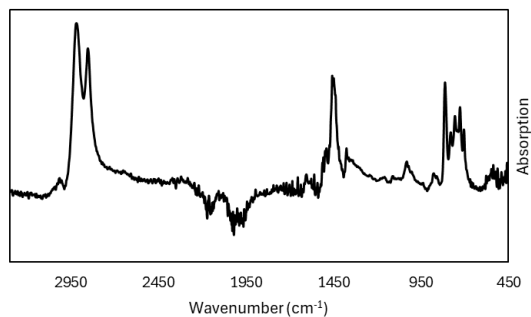

**Fig. S75** FT-IR spectrum of Table S2, Entry 6

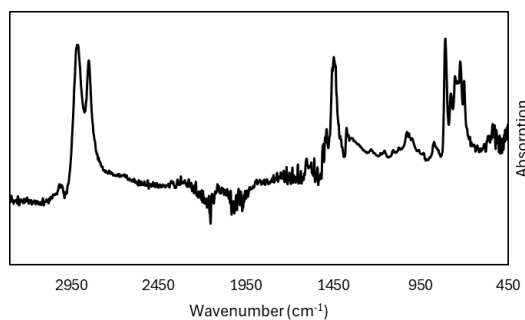

**Fig. S76** FT-IR spectrum of Table S3, Entry 1b

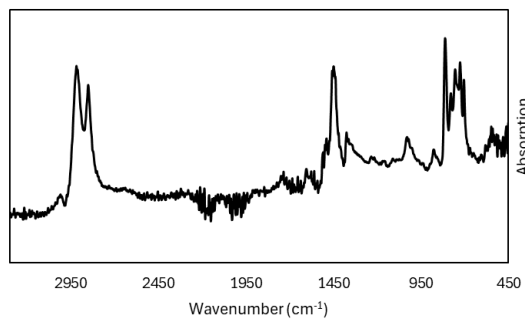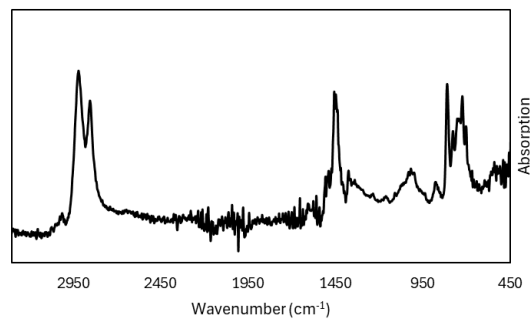

**Fig. S77** FT-IR spectrum of Table S3, Entry 2a (left) and 2c (right)

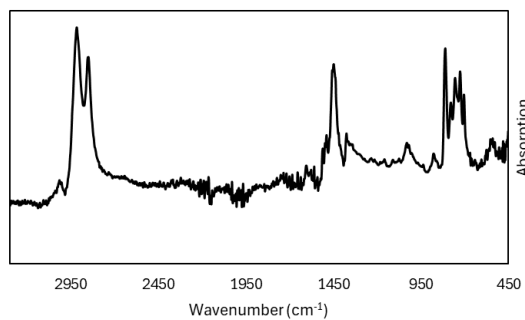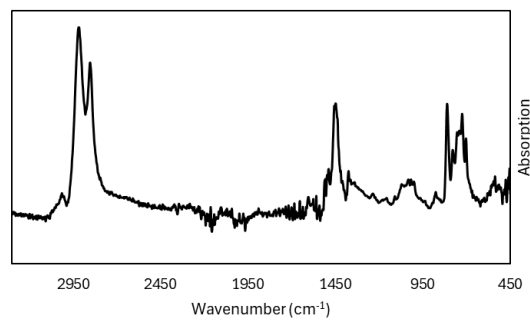

**Fig. S78** FT-IR spectrum of Table S3, Entry 3a (left) and 3c (right)

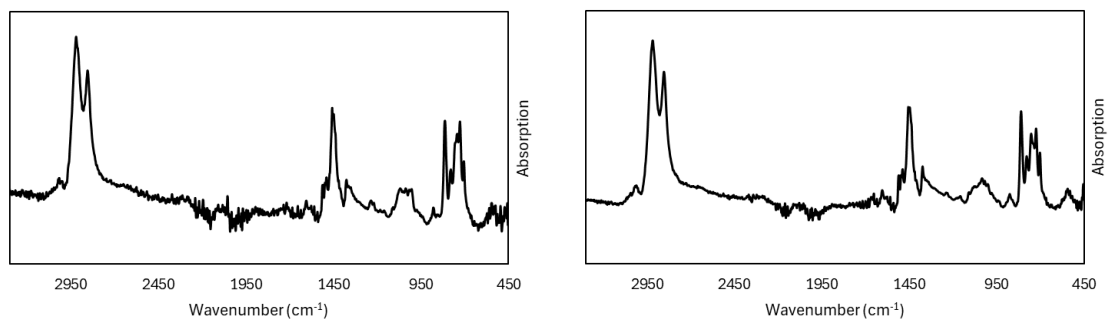

**Fig. S79** FT-IR spectrum of Table S3, Entry 4a (left) and 4c (right)

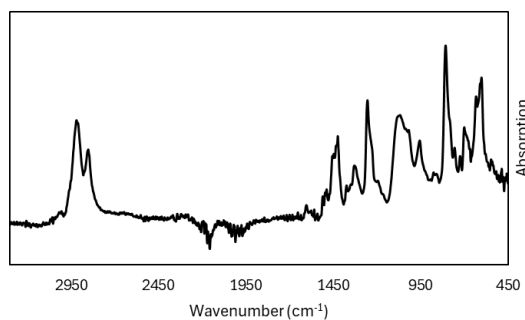

**Fig. S80** FT-IR spectrum of Table 2, Entry 9

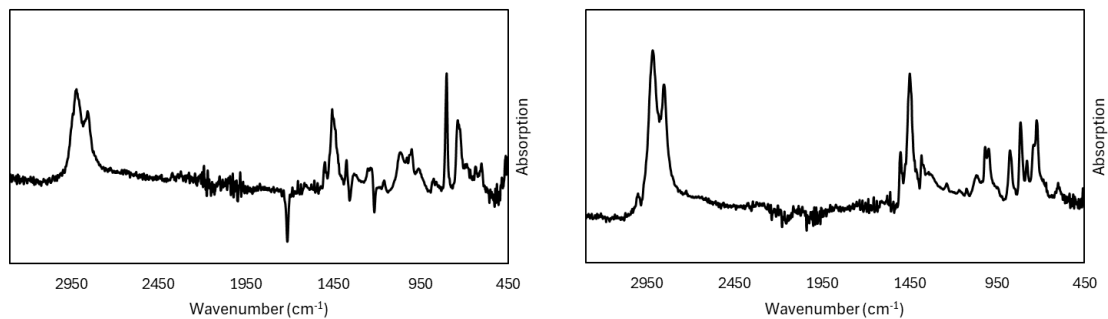

**Fig. S81** FT-IR spectrum of Table S5, Entry 1b (left) and 1c (right)

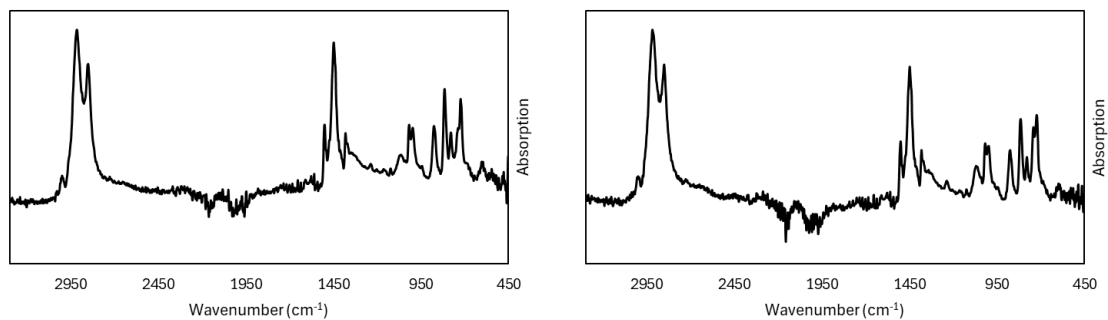

**Fig. S82** FT-IR spectrum of Table S5, Entry 2b (left) and 2c (right)

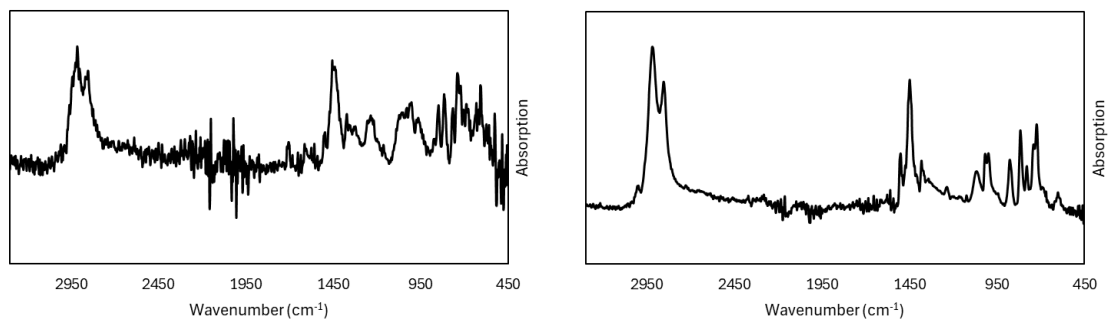

**Fig. S83** FT-IR spectrum of Table S5, Entry 3b (left) and 3c (right)

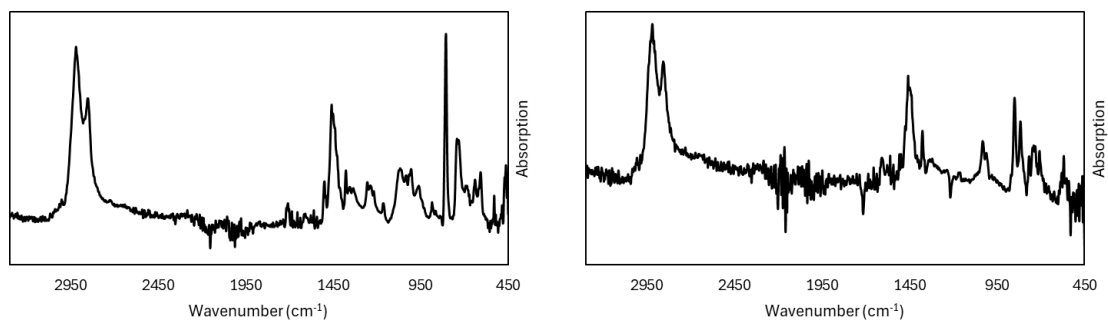

**Fig. S84** FT-IR spectrum of Table S6, Entry 1b (left) and 1c (right)

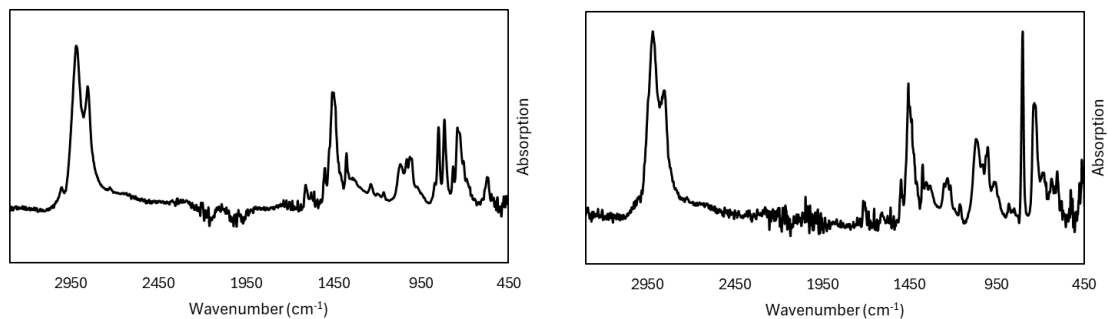

**Fig. S85** FT-IR spectrum of Table S6, Entry 2b (left) and 2c (right)

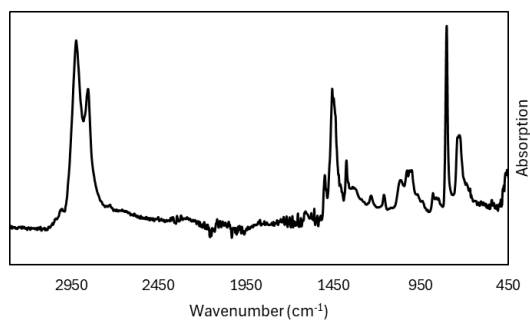

**Fig. S86** FT-IR spectrum of Table S7, Entry 1b

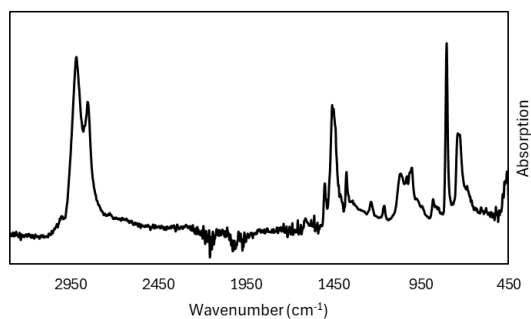

**Fig. S87** FT-IR spectrum of Table S7, Entry 2b

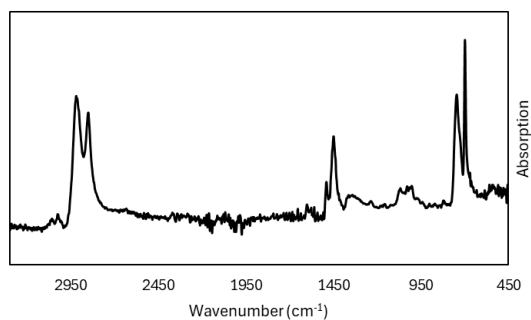

**Fig. S88** FT-IR spectrum of Table S8, Entry 1b

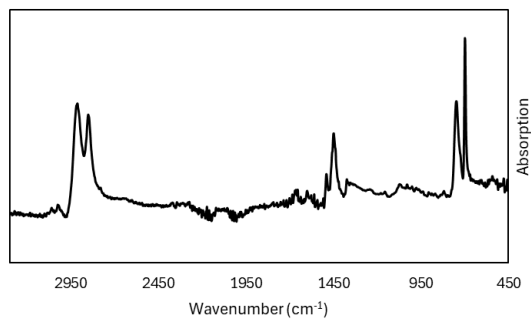

**Fig. S89** FT-IR spectrum of Table S8, Entry 2a

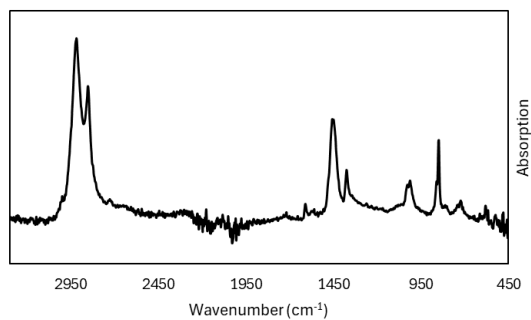

**Fig. S90** FT-IR spectrum of Table S9, Entry 1a

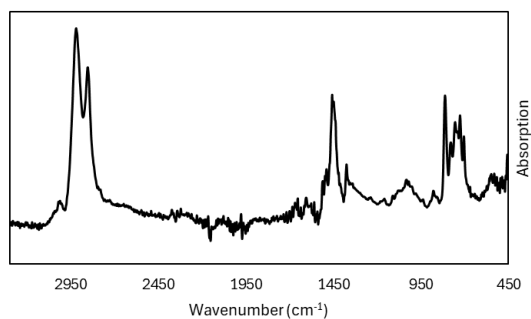

**Fig. S91** FT-IR spectrum of Table S10, Entry 2b

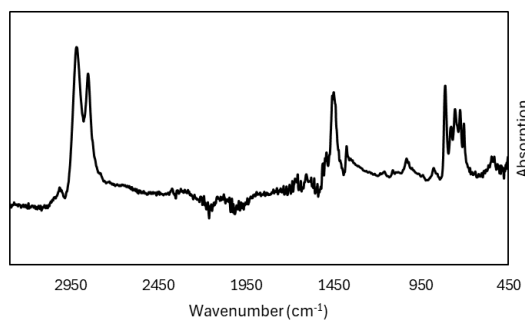

**Fig. S92** FT-IR spectrum of Table S10, Entry 5a

## 6. Differential Scanning Calorimetry (DSC)

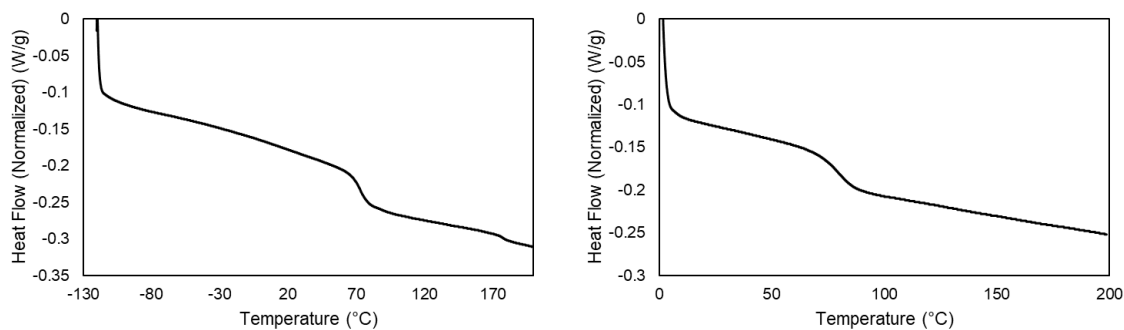

**Fig. S93** DSC (2<sup>nd</sup> heating curve) of Table S3, Entry 1a (left) and 1b (right)

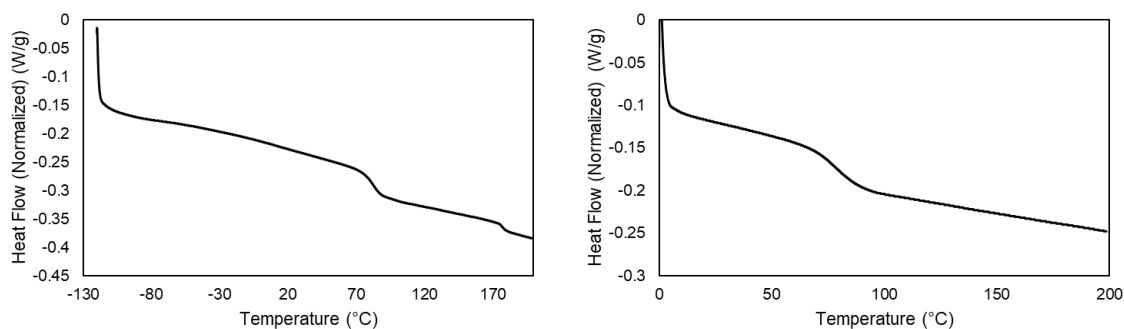

**Fig. S94** DSC (2<sup>nd</sup> heating curve) of Table S3, Entry 2a (left) and 2c (right)

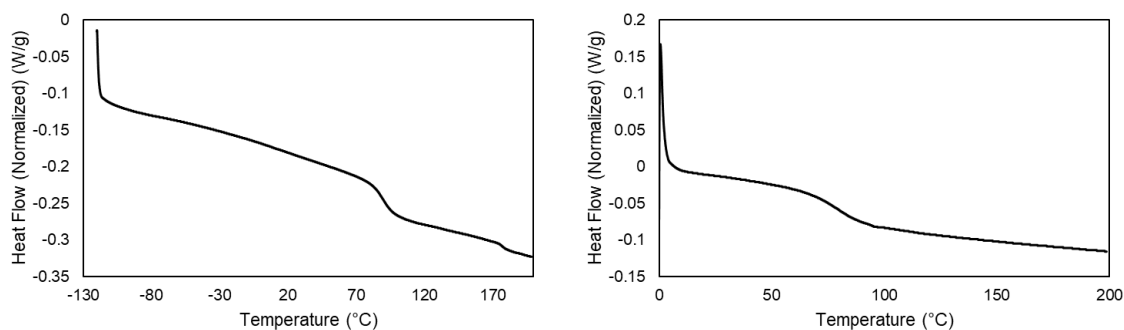

**Fig. S95** DSC (2<sup>nd</sup> heating curve) of Table S3, Entry 3a (left) and 3c (right)

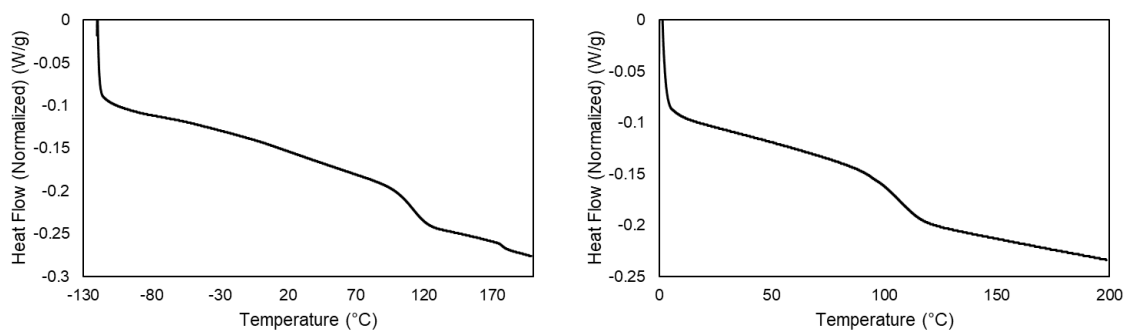

**Fig. S96** DSC (2<sup>nd</sup> heating curve) of Table S3, Entry 4a (left) and 4c (right)

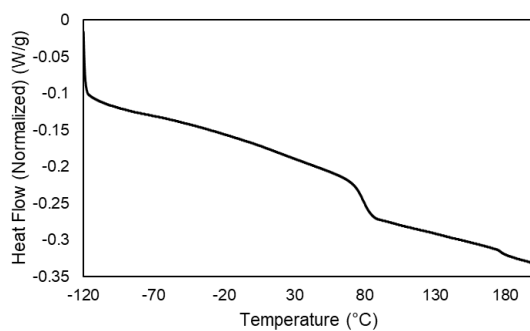

**Fig. S97** DSC (2<sup>nd</sup> heating curve) of Table S3, Entry 6a

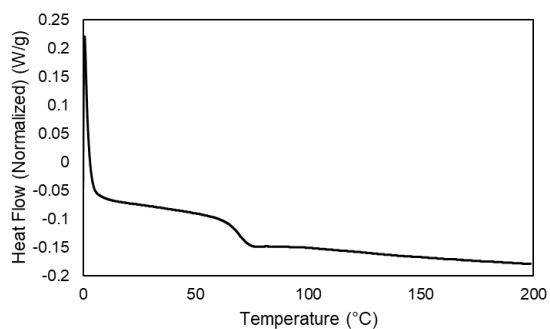

**Fig. S98** DSC (2<sup>nd</sup> heating curve) of Table S4, Entry 2b

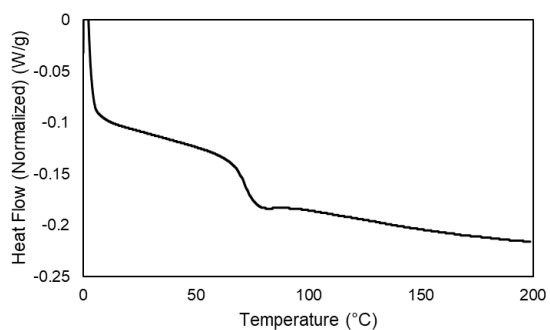

**Fig. S99** DSC (2<sup>nd</sup> heating curve) of Table S4, Entry 4a

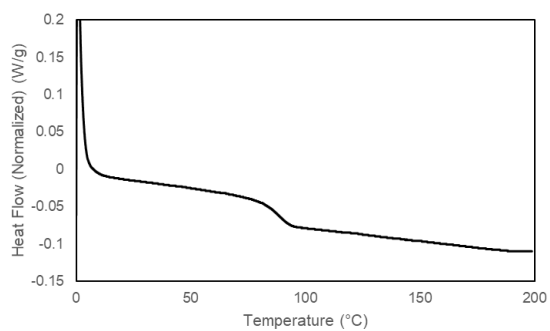

**Fig. S100** DSC (2<sup>nd</sup> heating curve) of Table S4, Entry 5

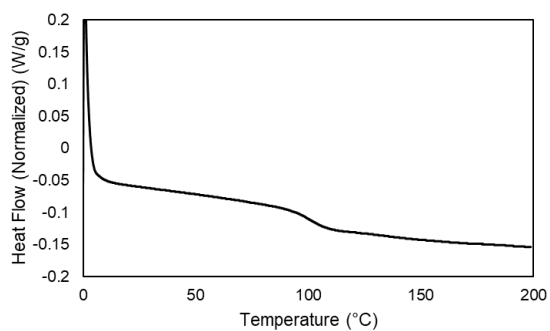

**Fig. S101** DSC (2<sup>nd</sup> heating curve) of Table S4, Entry 6

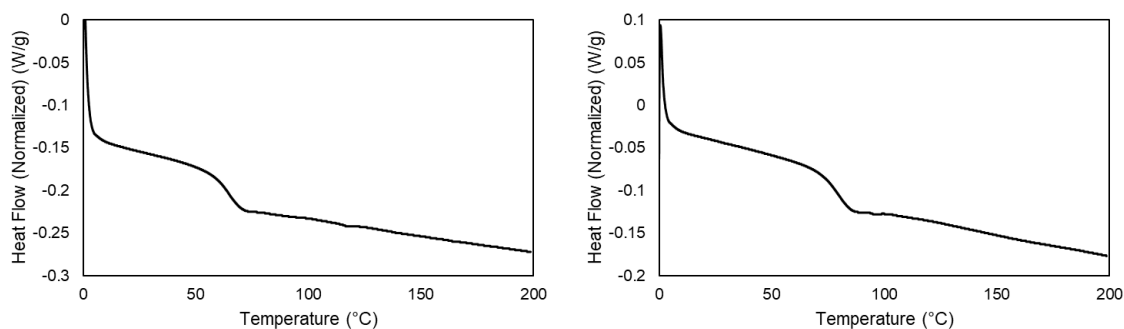

**Fig. S102** DSC (2<sup>nd</sup> heating curve) of Table S5, Entry 1a (left) and 1c (right)

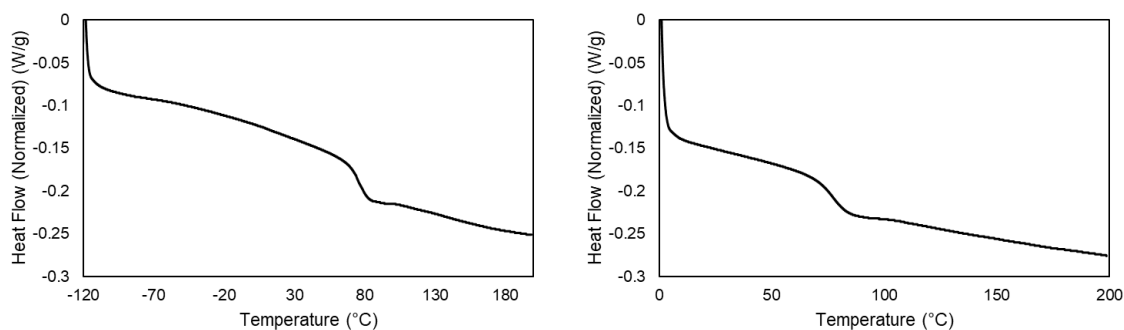

**Fig. S103** DSC (2<sup>nd</sup> heating curve) of Table S5, Entry 2a (left) and 2b (right)

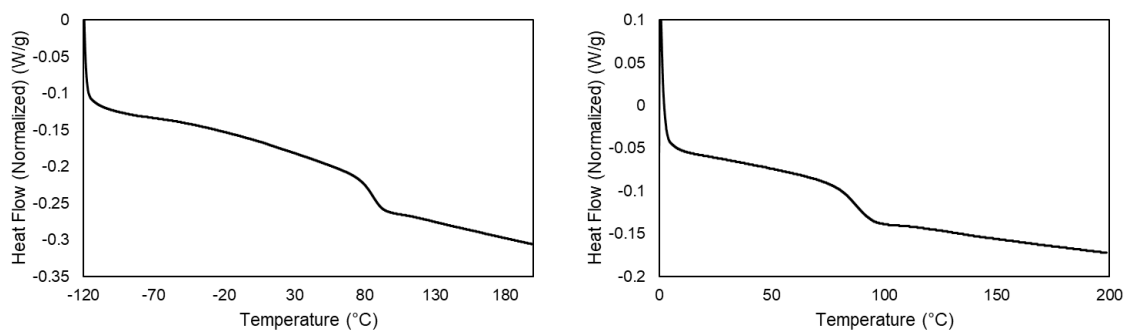

**Fig. S104** DSC (2<sup>nd</sup> heating curve) of Table S5, Entry 3a (left) and 3c (right)

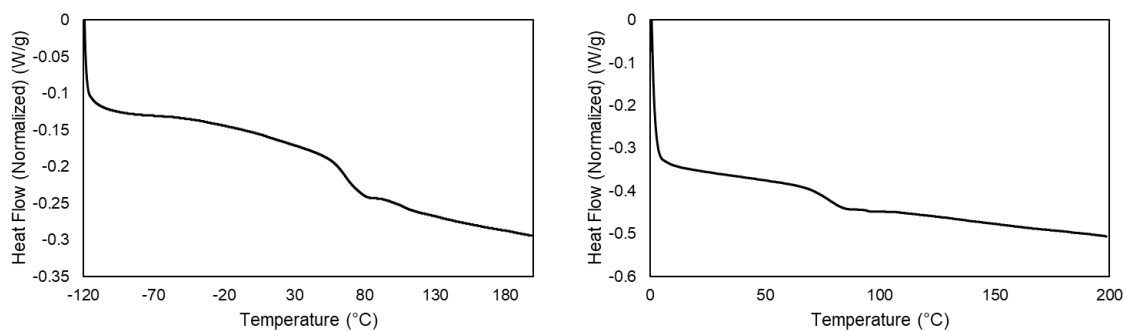

**Fig. S105** DSC (2<sup>nd</sup> heating curve) of Table S6, Entry 1a (left) and 1c (right)

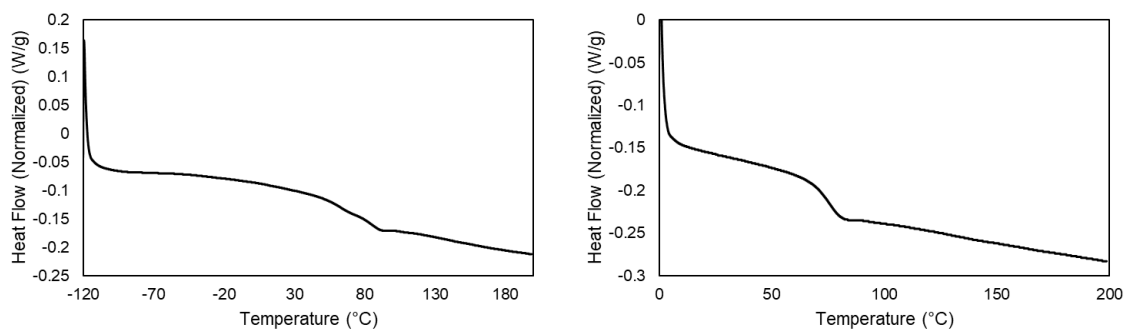

**Fig. S106** DSC (2<sup>nd</sup> heating curve) of Table S6, Entry 2a (left) and 2c (right)

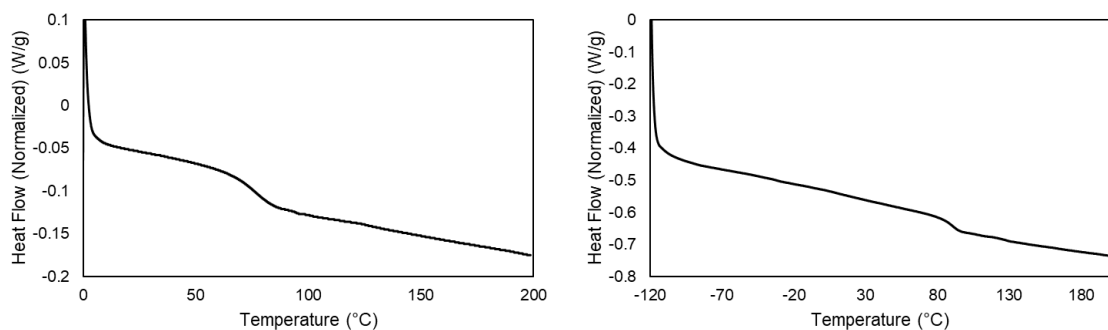

**Fig. S107** DSC (2<sup>nd</sup> heating curve) of Table S6, Entry 3a (left) and 3c (right)

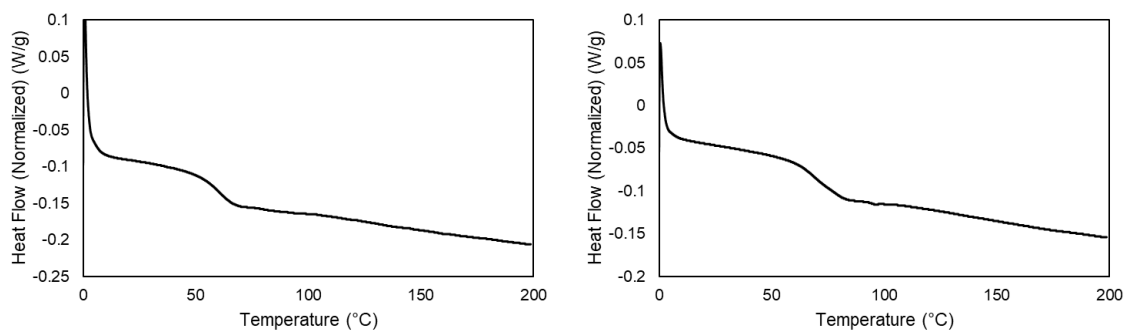

**Fig. S108** DSC (2<sup>nd</sup> heating curve) of Table S7, Entry 1a (left) and 1b (right)

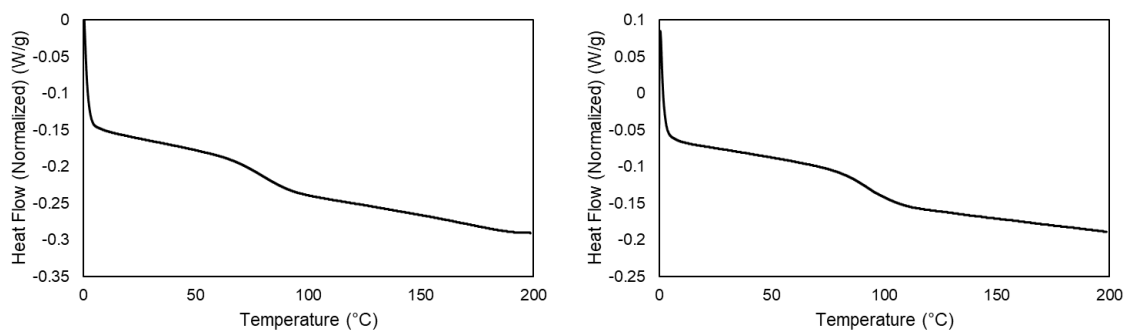

**Fig. S109** DSC (2<sup>nd</sup> heating curve) of Table S7, Entry 2a (left) and 2b (right)

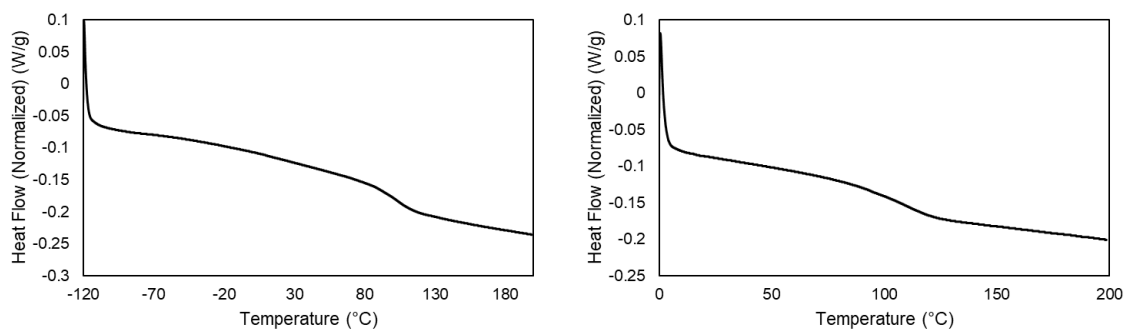

**Fig. S110** DSC (2<sup>nd</sup> heating curve) of Table S7, Entry 3a (left) and 3b (right)

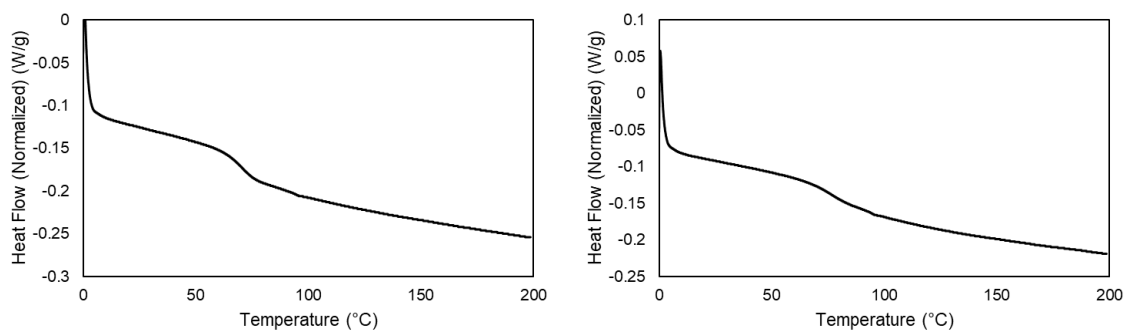

**Fig. S111** DSC (2<sup>nd</sup> heating curve) of Table S8, Entry 1a (left) and 1b (right)

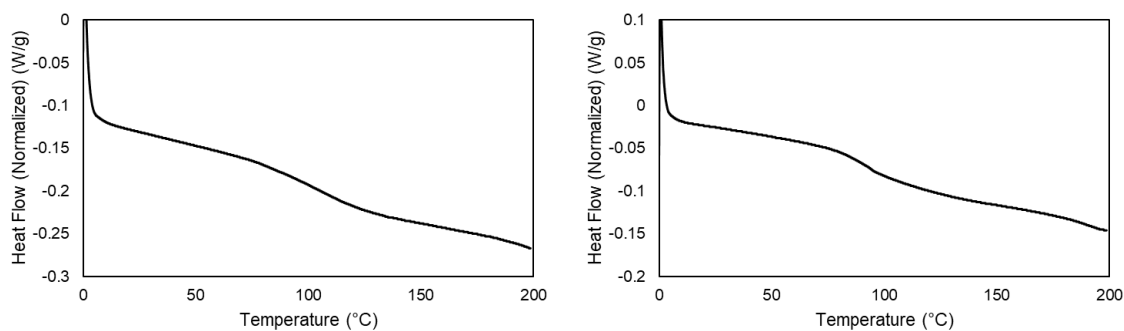

**Fig. S112** DSC (2<sup>nd</sup> heating curve) of Table S8, Entry 2a (left) and 2b (right)

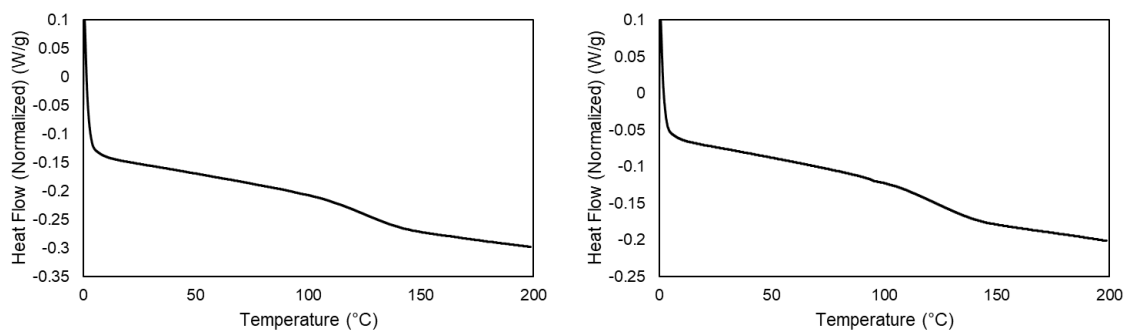

**Fig. S113** DSC (2<sup>nd</sup> heating curve) of Table S8, Entry 3a (left) and 3b (right)

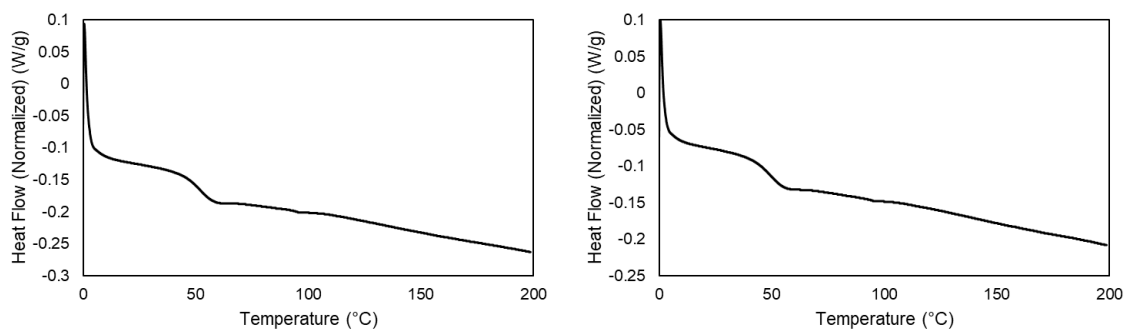

**Fig. S114** DSC (2<sup>nd</sup> heating curve) of Table S9, Entry 1a (left) and 1b (right)

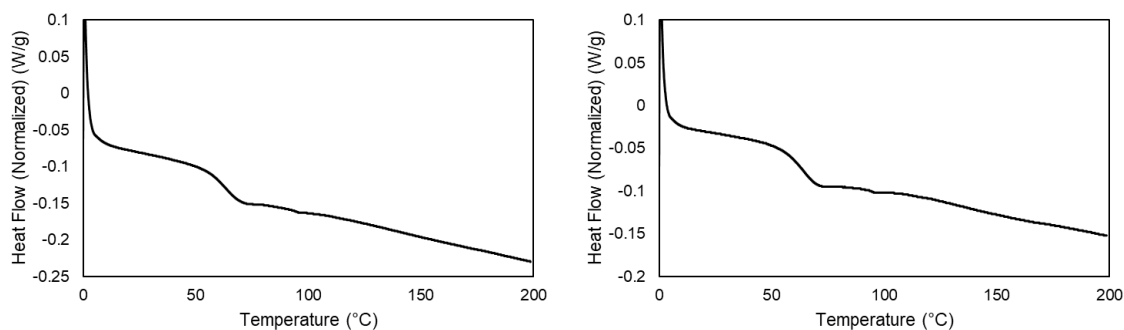

**Fig. S115** DSC (2<sup>nd</sup> heating curve) of Table S9, Entry 2a (left) and 2b (right)

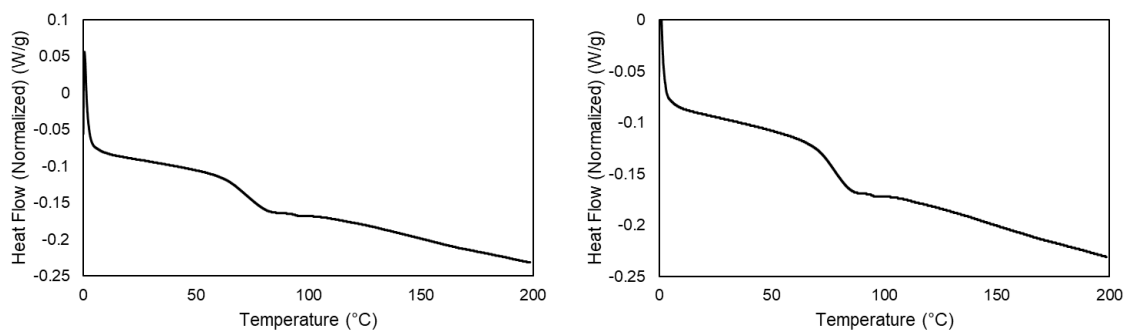

**Fig. S116** DSC (2<sup>nd</sup> heating curve) of Table S9, Entry 3a (left) and 3b (right)

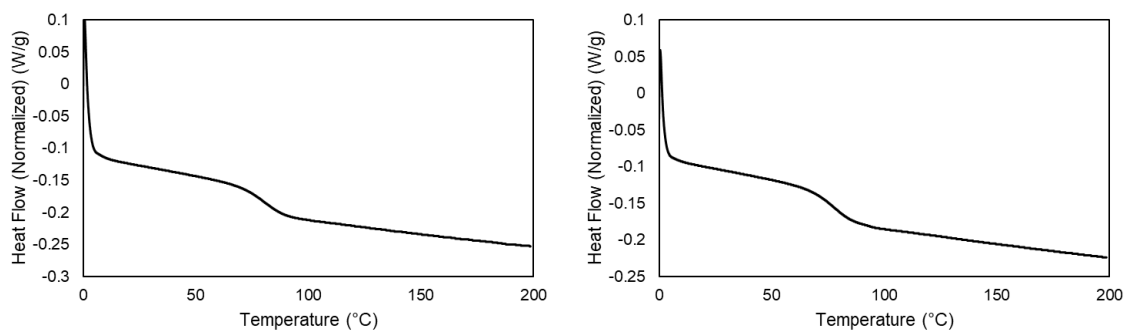

**Fig. S117** DSC (2<sup>nd</sup> heating curve) of Table S10, Entry 1a (left) and 1b (right)

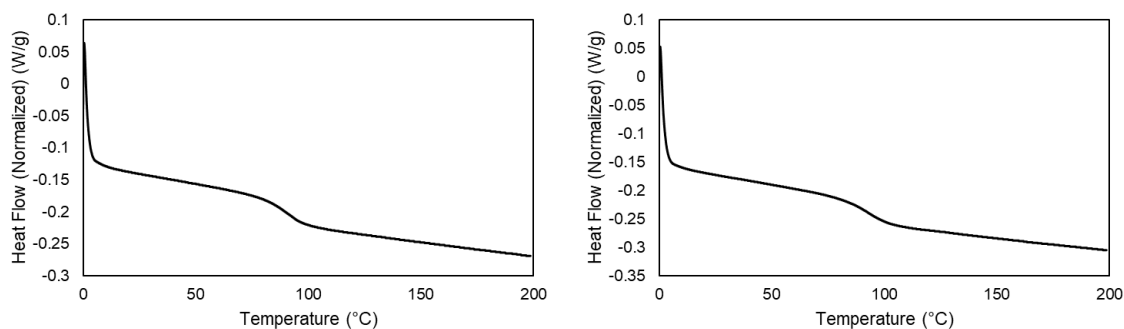

**Fig. S118** DSC (2<sup>nd</sup> heating curve) of Table S10, Entry 2a (left) and 2b (right)

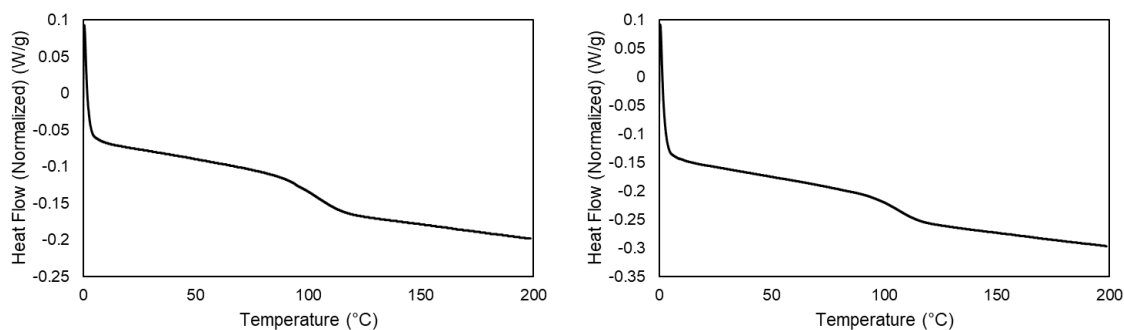

**Fig. S119** DSC (2<sup>nd</sup> heating curve) of Table S10, Entry 3a (left) and 3b (right)

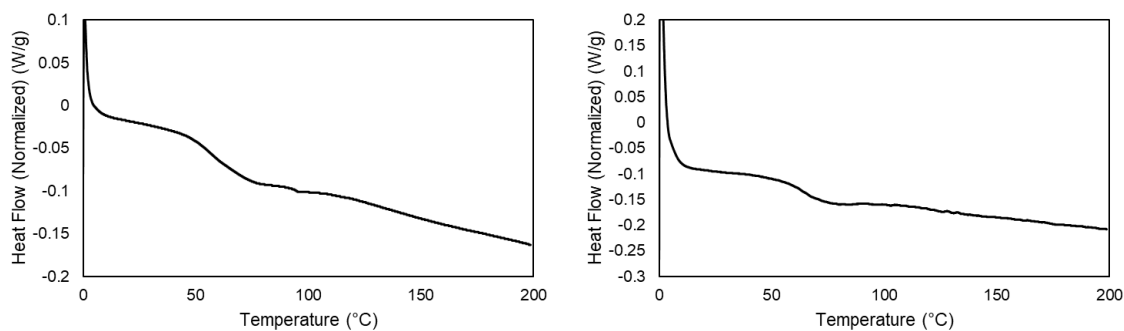

**Fig. S120** DSC (2<sup>nd</sup> heating curve) of Table S10, Entry 4a (left) and 4b (right)

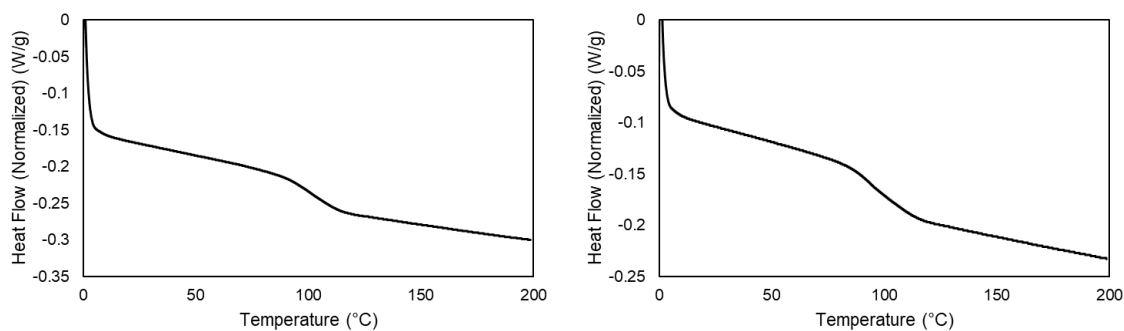

**Fig. S121** DSC (2<sup>nd</sup> heating curve) of Table S10, Entry 5a (left) and 5b (right)

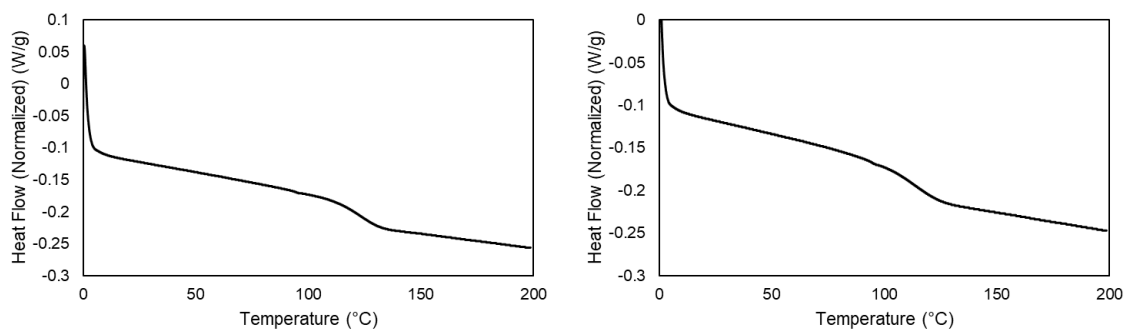

**Fig. S122** DSC (2<sup>nd</sup> heating curve) of Table S10, Entry 6a (left) and 6b (right)

## 7. Thermogravimetric Analysis (TGA)

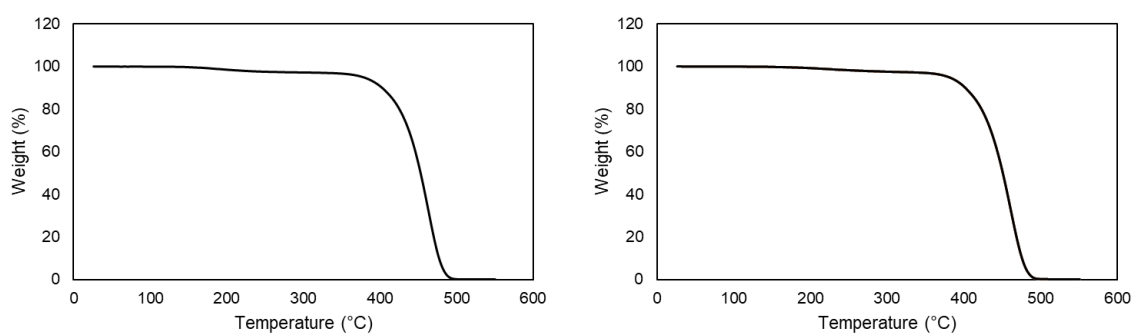

**Fig. S123** TGA heating curve of Table S3, Entry 1b (left) and 2c (right)

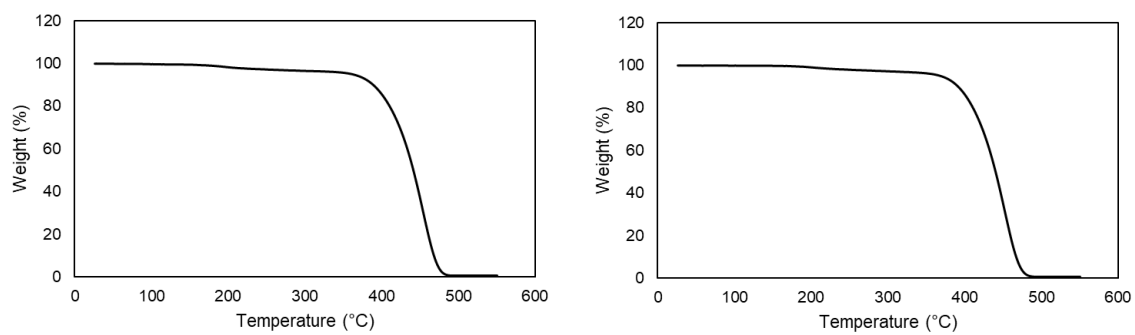

**Fig. S124** TGA heating curve of Table S5, Entry 1b (left) and 2b (right)

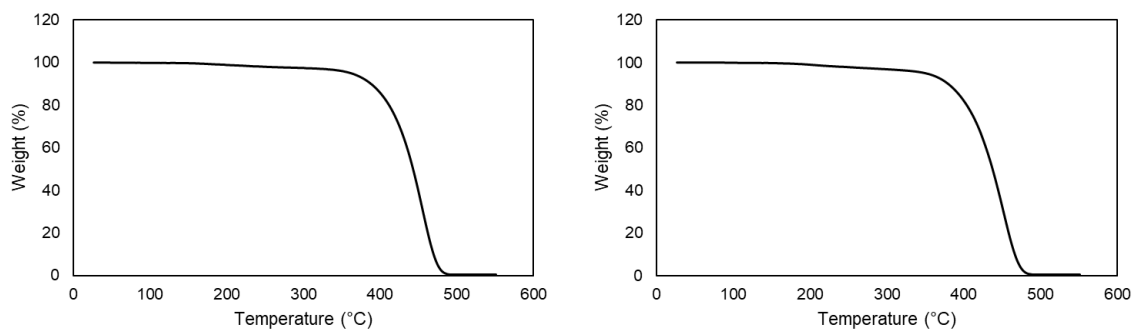

**Fig. S125** TGA heating curve of Table S6, Entry 1b (left) and 2c (right)

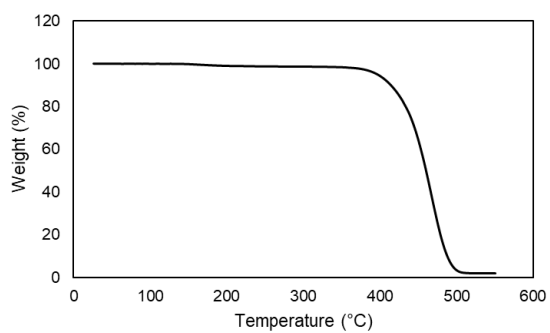

**Fig. S126** TGA heating curve of Table S8, Entry 3a

## 8. Computational Details

### Identifying if TMDS could contribute two hydrides

Replacement of the first hydride in TMDS with a chloride from PVC substrate (2-chloropropane) occurs from State 1 to 4. Although, the net energy change from 1 to 4 is negative suggesting thermodynamic feasibility of this replacement, the energy change from 3 to 4 is slightly uphill. States 5 to 8 represent the replacement of second hydride within the same TMDS with a chloride from another PVC molecule. As in case of the first hydride replacement, the net energy change for second replacement is negative with the final step of chloride abstraction (7 to 8) being slightly uphill. Thus, it may be energetically feasible for TMDS to donate both of its hydrides and dechlorinate two C-Cl bonds in PVC.

state 1

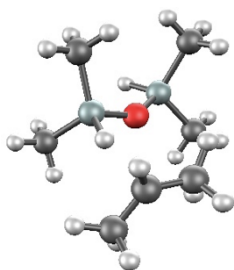

state 2

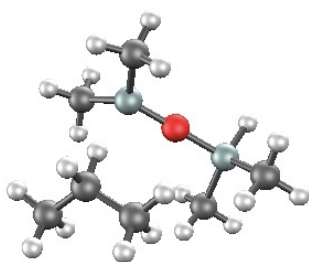

state 3

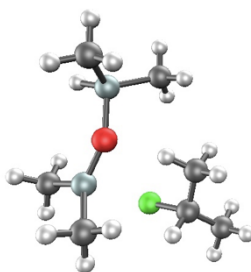

state 4

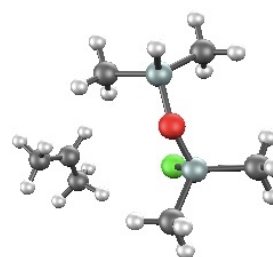

state 8

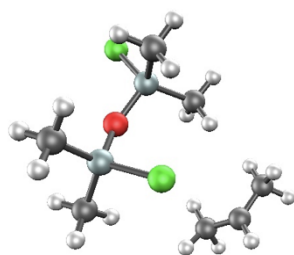

state 7

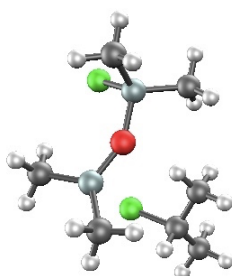

state 6

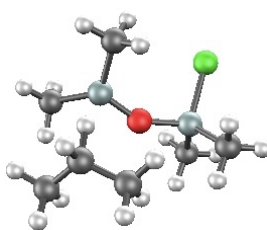

state 5

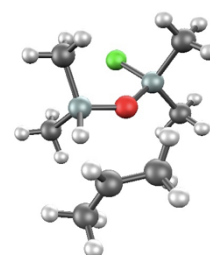

**Table S11** Relative free energies of states representing hydride transfer from TMDS to the model propyl cation/2-chloropropane (2CP) and their diagrammatic representations. TMDS\_x\_x is TMDS where x represents the bond to Si either H or Cl, TMDS\_cation represents a Si<sup>+</sup> formed in the TMDS.

| States | Constituent species                          | ΔG (kJ/mol) |
|--------|----------------------------------------------|-------------|
| 1      | Isopropyl cation + TMDS_H_H + 2*2CP          | 0.00        |
| 2      | propane + TMDS_cation + 2*2CP                | -85.40      |
| 3      | TMDS_cation + 2*2CP + propane                | -119.07     |
| 4      | Isopropyl cation + TMDS_H_Cl + propane + 2CP | -113.29     |
| 5      | Isopropyl cation + TMDS_H_Cl + propane + 2CP | -161.15     |
| 6      | TMDS_cation + 2*propane + 2CP                | -234.80     |
| 7      | TMDS_cation + 2CP + 2*propane                | -264.24     |
| 8      | TMDS_Cl_Cl + isopropyl cation + 2*propane    | -261.91     |

### Comparing Hydrodechlorination with Inter- and Intramolecular Friedel Crafts Alkylation

**Table S12** Free energy changes associated with hydride addition, FC alkylation, and polyindene formation upon dechlorination of model PVC compounds.

| States | Constituent species                                                                        | ΔG (kJ/mol) |
|--------|--------------------------------------------------------------------------------------------|-------------|
| REF    | REF + 2*benzene + 2*(HSiEt <sub>3</sub> )                                                  | 0.00        |
| Ph     | Ph + HSiEt <sub>3</sub> + Et <sub>3</sub> Si <sup>+</sup> + benzene + H <sub>2</sub>       | -103.69     |
| H      | H + HSiEt <sub>3</sub> + Et <sub>3</sub> Si <sup>+</sup> + 2*benzene                       | -153.6      |
| Ph,Ph  | Ph,Ph + ClSiEt <sub>3</sub> + 2*H <sub>2</sub> + Et <sub>3</sub> Si <sup>+</sup>           | -222.22     |
| POLY   | POLY + 2* H <sub>2</sub> + Et <sub>3</sub> Si <sup>+</sup> + ClSiEt <sub>3</sub> + Benzene | -231.11     |
| H,Ph   | H,Ph + ClSiEt <sub>3</sub> + Et <sub>3</sub> Si <sup>+</sup> + benzene + H <sub>2</sub>    | -267.19     |
| Ph,H   | Ph,H + ClSiEt <sub>3</sub> + Et <sub>3</sub> Si <sup>+</sup> + benzene + H <sub>2</sub>    | -273.48     |
| H,H    | H,H + ClSiEt <sub>3</sub> + Et <sub>3</sub> Si <sup>+</sup> + 2*benzene                    | -313.83     |

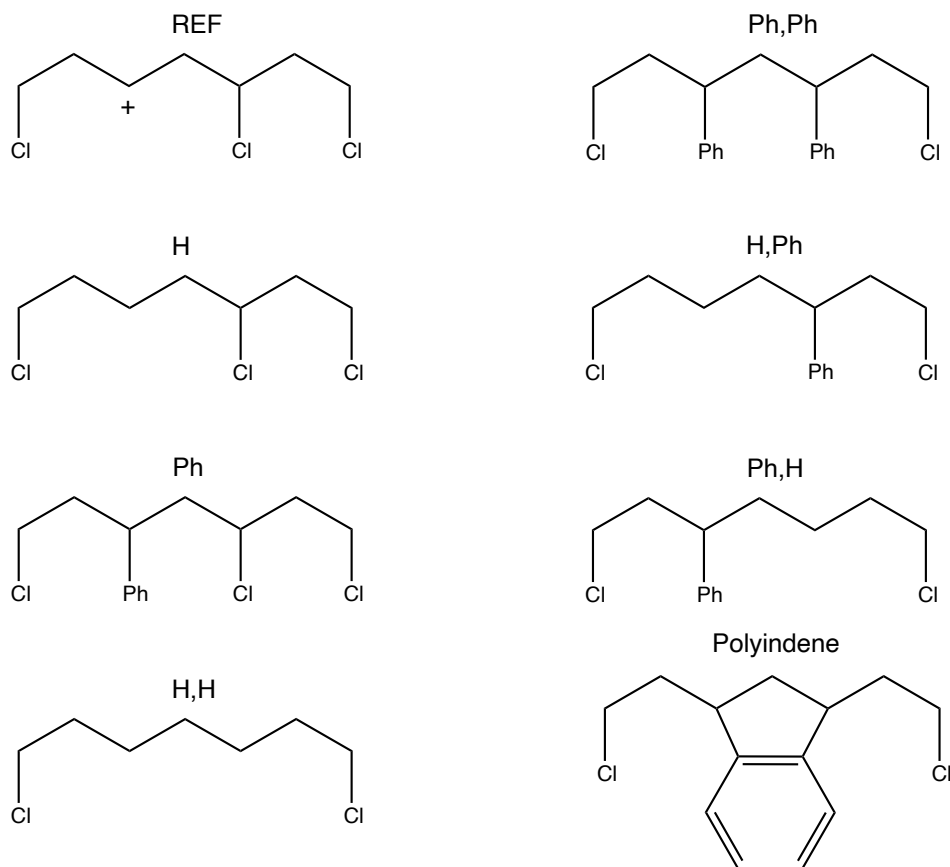

**Fig. S127** Structures constituting states described on Fig. 4 of the paper and Table S12 of the SI.

## 9. References

- <sup>1</sup> E. Epifanovsky, A. T. B. Gilbert, X. Feng, J. Lee, Y. Mao, N. Mardirossian, P. Pokhilko, A. F. White, M. P. Coons, A. L. Dempwolff, Z. Gan, D. Hait, P. R. Horn, L. D. Jacobson, I. Kaliman, J. Kussmann, A. W. Lange, K. U. Lao, D. S. Levine, J. Liu, S. C. McKenzie, A. F. Morrison, K. D. Nanda, F. Plasser, D. R. Rehn, M. L. Vidal, Z.-Q. You, Y. Zhu, B. Alam, B. J. Albrecht, A. Aldossary, E. Alguire, J. H. Andersen, V. Athavale, D. Barton, K. Begam, A. Behn, N. Bellonzi, Y. A. Bernard, E. J. Berquist, H. G. A. Burton, A. Carreras, K. Carter-Fenk, R. Chakraborty, A. D. Chien, K. D. Closser, V. Cofer-Shabica, S. Dasgupta, M. de Wergifosse, J. Deng, M. Diedenhofen, H. Do, S. Ehlert, P.-T. Fang, S. Fatehi, Q. Feng, T. Friedhoff, J. Gayvert, Q. Ge, G. Gidofalvi, M. Goldey, J. Gomes, C. E. González-Espinoza, S. Gulania, A. O. Gunina, M. W. D. Hanson-Heine, P. H. P. Harbach, A. Hauser, M. F. Herbst, M. Hernández Vera, M. Hodecker, Z. C. Holden, S. Houck, X. Huang, K. Hui, B. C. Huynh, M. Ivanov, Á. Jász, H. Ji, H. Jiang, B. Kaduk, S. Kähler, K. Khistyayev, J. Kim, G. Kis, P. Klunzinger, Z. Koczor-Benda, J. H. Koh, D. Kosenkov, L. Koulias, T. Kowalczyk, C. M. Krauter, K. Kue, A. Kunitsa, T. Kus, I. Ladjánszki, A. Landau, K. V. Lawler, D. Lefrancois, S. Lehtola, R. R. Li, Y.-P. Li, J. Liang, M. Liebenthal, H.-H. Lin, Y.-S. Lin, F. Liu, K.-Y. Liu, M. Loipersberger, A. Luenser, A. Manjanath, P. Manohar, E. Mansoor, S. F. Manzer, S.-P. Mao, A. V. Marenich, T. Markovich, S. Mason, S. A. Maurer, P. F. McLaughlin, M. F. S. J. Menger, J.-M. Mewes, S. A. Mewes, P. Morgante, J. W. Mullinax, K. J. Oosterbaan, G. Paran, A. C. Paul, S. K. Paul, F. Pavošević, Z. Pei, S. Prager, E. I. Proynov, Á. Rák, E. Ramos-Cordoba, B. Rana, A. E. Rask, A. Rettig, R. M. Richard, F. Rob, E. Rossomme, T. Scheele, M. Scheurer, M. Schneider, N. Sergueev, S. M. Sharada, W. Skomorowski, D. W. Small, C. J. Stein, Y.-C. Su, E. J.

- 
- Sundstrom, Z. Tao, J. Thirman, G. J. Tornai, T. Tsuchimochi, N. M. Tubman, S. P. Veccham, O. Vydrov, J. Wenzel, J. Witte, A. Yamada, K. Yao, S. Yeganeh, S. R. Yost, A. Zech, I. Y. Zhang, X. Zhang, Y. Zhang, D. Zuev, A. Aspuru-Guzik, A. T. Bell, N. A. Besley, K. B. Bravaya, B. R. Brooks, D. Casanova, J.-D. Chai, S. Coriani, C. J. Cramer, G. Cserey, A. E. DePrince, R. A. DiStasio, A. Dreuw, B. D. Dunietz, T. R. Furlani, W. A. Goddard, S. Hammes-Schiffer, T. Head-Gordon, W. J. Hehre, C.-P. Hsu, T.-C. Jagau, Y. Jung, A. Klamt, J. Kong, D. S. Lambrecht, W. Liang, N. J. Mayhall, C. W. McCurdy, J. B. Neaton, C. Ochsenfeld, J. A. Parkhill, R. Peverati, V. A. Rassolov, Y. Shao, L. V. Slipchenko, T. Stauch, R. P. Steele, J. E. Subotnik, A. J. W. Thom, A. Tkatchenko, D. G. Truhlar, T. Van Voorhis, T. A. Wesolowski, K. B. Whaley, H. L. Woodcock, P. M. Zimmerman, S. Faraji, P. M. W. Gill, M. Head-Gordon, J. M. Herbert and A. I. Krylov, *J. Chem. Phys.*, 2021, **155**, 084801.
- <sup>2</sup> J.-D. Chai and M. Head-Gordon, *Phys. Chem. Chem. Phys.* 2008, **10**, 6615-6620.
- <sup>3</sup> J.-D. Chai and M. Head-Gordon, *J. Chem. Phys.* 2008, **128**, 084106.
- <sup>4</sup> T. N. Truong and E. V. Stefanovich, *Chem. Phys. Lett.* 1995, **240**, 253-260.
- <sup>5</sup> V. Barone and M. Cossi, *J. Phys. Chem. A* 1998, **102**, 1995-2001.
- <sup>6</sup> M. Cossi, N. Rega, G. Scalmani and V. Barone, *J. Comput. Chem.* 2003, **24**, 669-681.
- <sup>7</sup> McQuarrie, D. A. Ideal polyatomic gas, In *Statistical Mechanics*, University Science Books, pp. 129-141.
